# Supplementary material for: Covalent-coordination driven hierarchical assembly of tubular frameworks
Source: Research Square preprint supplement (doi:10.21203/rs.3.rs-3333308/v1), 2023-10-20
Supplement: Supplementary file 1 [file 2d431a20839ba7066386a201.docx]

Supplementary Materials for

**Covalent-coordination driven hierarchical assembly of tubular frameworks**

Hai-Sen Xu,1,2† Yi Luo,3† Lin Liang,4 Runlai Li,5 Hongfei Wang,1 Ting Chen,1 Wen-Na Jiao,1 Si Huang,1 Wei-De Zhu,1 Mathias Nero,3 Fangzheng Chen,2 Qiang Gao,6 Xing Li,2 Mei Pan,1 Willhammar Tom,3* Kian Ping Loh,2* Cheng-Yong Su1*

†These authors contributed equally to this work.

*Correspondence to: cesscy@mail.sysu.edu.cn (C.-Y.S.); chmlohkp@nus.edu.sg (K.P.L.); tom.willhammar@mmk.su.se (W.T.).

**The PDF file includes:**

Materials and Methods

Supplementary Text

Supplementary Figures 1-72

Supplementary Tables 1-4

Supplementary References

**Other Supplementary Materials for this manuscript include the following:**

Structural Models (CIF Files)

**Materials and Methods**

Reagent

All commercially available starting compounds and solvents were purchased from commercial sources and used without further purification. Compounds 4-bromopyridine-2,6-dicarbaldehyde (**S1**)1 and 1,4-dibromo-2,5-bis(hexyloxy)benzene (**S3**)2 were synthesized according to reported procedures.

Instrumentation and characterization

Liquid 1H and 13C NMR spectra were recorded on Bruker AVANCE I 300 MHz, Bruker AVANCE III 400 MHz, and Bruker AVANCE I 500 MHz spectrometers.

Solid-state NMR experiments were performed on a Bruker Avance II 400 MHz wide-bore spectrometer at a 13C resonance frequency of 100.6 MHz with a 4-mm double-resonance MAS probe.

High-resolution mass spectrometry (HRMS) data were obtained on a Bruker maXis 4G ESI-Q-TOF with Tunningmix as calibrating agent.

Fourier-transform infrared spectroscopy (FT-IR) was carried out on a Frontier FT-IR spectrometer in transmission mode.

Thermogravimetric analysis (TGA) was carried out on a Netzsch TG 209F3 equipment within the temperature range of 30 °C to 700 °C under nitrogen (N2) atmosphere with a heating rate of 10 °C/min.

The metal contents were determined *via* inductively coupled plasma mass spectrometry (ICP-MS) on an iCAP RQ (Thermo Fisher Scientific) analyzer.

Powder X-ray diffraction (PXRD) data were collected on a Rigaku SmartLab X-ray diffractometer using Cu K*α* radiation (40 kV, 40 mA) at room temperature.

Nitrogen (N2) adsorption-desorption isotherms at 77 K were obtained using a Quantachrome Autosorb-iQ2-MP gas adsorption analyzer. Surface areas were calculated using the Brunauer−Emmett−Teller (BET) method. Pore size distributions were calculated from adsorption isotherms using quenched solid density functional theory (QSDFT). The carbon dioxide (CO2) adsorption-desorption isotherm was performed at 195 K with a Micromeritics ASAP 2020 system.

Scanning electron microscopy (SEM) images were obtained with JEOL JSM-6701F and JSM-6330F microscopes.

Structural modeling and theoretical simulations were conducted using BIOVIA Materials Studio modeling version 2016 (Dassault Systèmes).

Scanning transmission electron microscopy (STEM) images were obtained using a ThermoFisher Themis Z double aberration-corrected TEM. Sample preparation for STEM imaging of SNF-LIFM1 was performed by embedding a small amount of the sample in a resin (LR White) inside a gelatin capsule (size 00). The resin was then hardened at 60 °C for 24 h. Ultra-thin sectioning, with an estimated section thickness of 50 nm, was later carried out using a Leica Ultracut UCT with a 45° diamond knife from Diatome. The sections were then transferred to carbon-coated copper grids (EMS-CF150-Cu-UL). The CNF-LIFMs were directly dispersed on a carbon-coated copper grid for imaging. The microscope was operated at an accelerating voltage of 300 kV. The images were acquired using a beam current of ~10 pA, a convergence angle of 16 mrad and a dwell time of 5 µs. Integrated differential phase contrast (iDPC) and annular dark field (ADF) images were obtained simultaneously. The ADF detector was set at a collection angle of 25-153 mrad. The iDPC images were formed using a segmented ADF detector. A high-pass filter was applied to the iDPC images to reduce low-frequency contrast. The lattice-averaged projected potential maps were obtained by crystallographic image processing using the software CRISP3.

3D electron diffraction (3D ED) data were collected using the cRED method implemented in the software Instamatic4, on a JEOL JEM-2100 transmission electron microscope (TEM) operating at 200 kV, equipped with a Timepix hybrid pixel detector (Amsterdam Scientific Instruments). The reciprocal space reconstruction and unit cell determination was carried out using the RED software5,6.

**Supplementary Text**

Synthesis of building unit **A1**


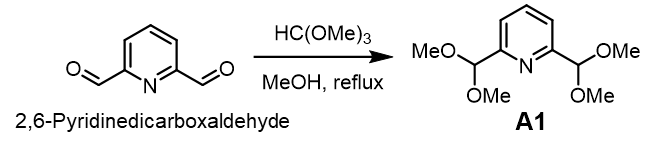


**Building unit A1**. 2,6-Pyridinedicarboxaldehyde (676 mg, 5.0 mmol), trimethyl orthoformate (5.306 g, 50.0 mmol), *p*-toluenesulfonic acid monohydrate (380 mg, 2.0 mmol) were dissolved in 70 mL MeOH in a round bottom flask. The resulting mixture was heated at 70 °C for 18 h and then concentrated to remove the solvent. The crude product was purified by column chromatography using petroleum ether/ethyl acetate = 5/1 as the eluent to give the building unit **A1** (818 mg, 72% yield).  1H NMR (400 MHz, CDCl3): *δ* = 7.75 (dd, *J* = 8.0, 7.5 Hz, 1H), 7.50 (d, *J* = 7.7 Hz, 2H), 5.36 (s, 2H), 3.37 (s, 12H). 13C NMR (100 MHz, CDCl3): *δ* = 156.66, 137.13, 120.88, 104.25, 53.75. HRMS: m/z calcd for C11H17NNaO4 [M + Na]+: 250.1050, found: 250.1051.

Synthesis of building unit **E1**


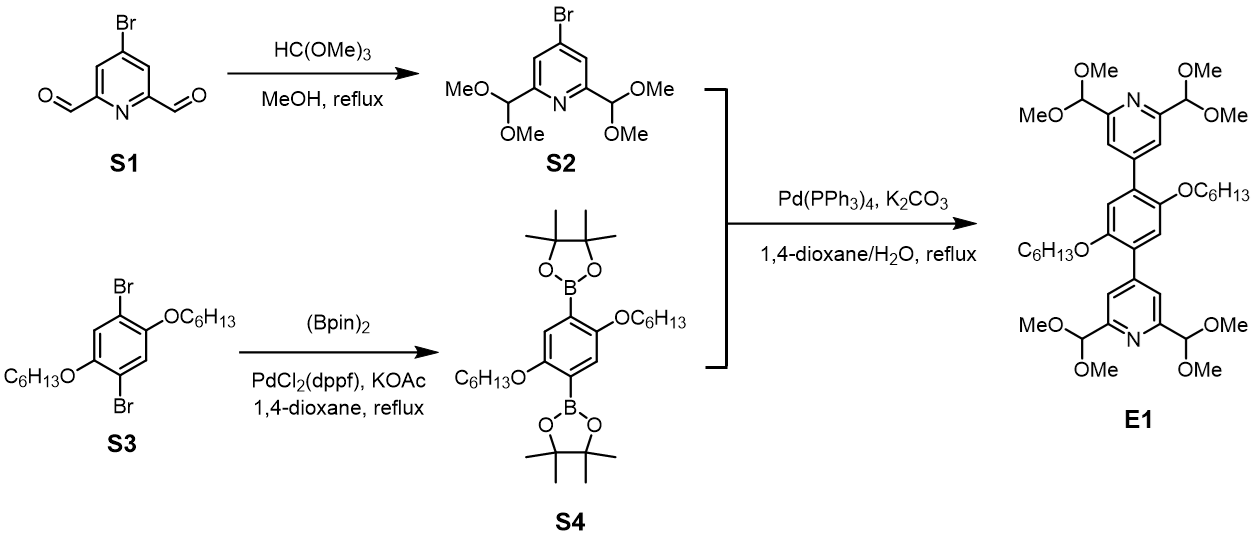


**Compound S2.** Compound **S1** (1.498 g, 7.0 mmol), trimethyl orthoformate (7.428 g, 70.0 mmol), *p*-toluenesulfonic acid monohydrate (533 mg, 2.8 mmol) were dissolved in 100 mL MeOH in a round bottom flask. The resulting mixture was heated at 70 °C for 18 h and then concentrated to remove the solvent. The crude product was purified by column chromatography using petroleum ether/ethyl acetate = 5/1 as the eluent to give the product **S2** (1.464 g, 68% yield).  1H NMR (400 MHz, CDCl3): *δ* = 7.71 (s, 2H), 5.34 (s, 2H), 3.39 (s, 12H). 13C NMR (100 MHz, CDCl3): *δ* = 158.19, 134.20, 124.52, 103.51, 53.87.

**Compound S4.** Compound **S3** (872 mg, 2.0 mmol), bis(pinacolato)diboron (1.117 g, 4.4 mmol), potassium acetate (1.18 g, 12.0 mmol), PdCl2(dppf) (146 mg, 0.2 mmol), and dry 1,4-dioxane (20 mL) were added to a round bottom flask. The mixture was degassed by the freeze-pump-thaw method, and then heated to reflux at 100 °C for 24 h under N2. After cooling to room temperature, the solvent was removed under reduced pressure. The residue was treated with H2O and extracted with petroleum ether. The organic phase was washed with brine, dried over Na2SO4, and concentrated under reduced pressure. The residue was thoroughly washed with n-hexane, and then filtered through Celite. After concentrating under vacuum, the solid was washed with a small amount of methanol to remove impurities, filtered, and dried to afford **S4** as a white solid (796 mg, 75% yield). 1H NMR (500 MHz, CDCl3): *δ* = 7.08 (s, 2H), 3.94 (t, *J* = 6.3 Hz, 4H), 1.75 (ddt, *J* = 9.3, 7.9, 6.3 Hz, 4H), 1.57–1.45 (m, 6H), 1.34 (s, 24H), 1.33–1.31 (m, 6H), 0.95–0.85 (m, 6H).

**Building unit E1**. Compound **S4** (530 mg, 1.0 mmol), compound **S2** (674 mg, 2.2 mmol), K2CO3 (828 mg, 6.0 mmol), Pd(PPh3)4 (116 mg, 0.1 mmol), 1,4-dioxane (40 mL), and H2O (10 mL) were added to a round-bottomed flask. The mixture was degassed by the freeze-pump-thaw method, and then heated to reflux for 24 h under N2. After cooling to room temperature, the solvent was removed under reduced pressure. The residue was treated with water and extracted with ethyl acetate. The organic phase was washed with brine, dried over Na2SO4, and concentrated under reduced pressure. The crude product was purified by silica gel column chromatography using petroleum ether/ethyl acetate = 4/1~3/1 as the eluent to give the building unit **E1** (678 mg, 93% yield). 1H NMR (400 MHz, CD2Cl2): *δ =* 7.75 (s, 4H), 7.04 (s, 2H), 5.39 (s, 4H), 3.97 (t, *J* = 6.4 Hz, 4H), 3.41 (s, 24H), 1.70 (p, *J* = 6.6 Hz, 4H), 1.45–1.34 (m, 4H), 1.28 (q, *J* = 3.6 Hz, 8H), 0.95–0.80 (m, 6H). 13C NMR (100 MHz, CD2Cl2): *δ* = 156.96, 150.92, 147.42, 129.57, 121.85, 115.70, 104.73, 70.09, 31.97, 29.67, 26.12, 22.93, 14.20. HRMS: m/z calcd for C40H60N2NaO10 [M + Na]+: 751.4140, found: 751.4142.

Synthesis of building unit **E2**

**Compound S5.** Compound **S2** (1.464 g, 4.8 mmol), bis(pinacolato)diboron (1.341 g, 5.3 mmol), potassium acetate (1.413 g, 14.4 mmol), PdCl2(dppf) (70 mg, 0.096 mmol), and 25 mL dry dioxane were added to a round bottom flask. The mixture was degassed by the freeze-pump-thaw method, and then heated at 80 °C for 16 h under N2. After cooling to room temperature, the solvent was removed under reduced pressure. The residue was treated with H2O and extracted with petroleum ether. The organic phase was washed with brine, dried over Na2SO4, and concentrated. The resulting solid was thoroughly washed with n-pentane, and then filtered through Celite. The crude product was obtained by concentrating the filtrate under vacuum. Afterrecrystallization from a small amount of n-pentane at -20 ℃, **S5** was obtained as white crystals (1.390 g, 82% yield). 1H NMR (400 MHz, CDCl3): *δ* = 7.88 (s, 2H), 5.40 (s, 2H), 3.39 (s, 12H), 1.33 (s, 12H). 13C NMR (150 MHz, CDCl3): *δ* = 155.97, 126.11, 104.32, 84.48, 53.71, 24.83.

**Compound S6.** Compound **S5** (1.060 g, 3.0 mmol), compound **S3** (3.926 g, 9.0 mmol), 2 M aqueous K2CO3 (24 mL), PdCl2(dppf) (110 mg, 0.15 mmol), and 60 mL toluene were added to a round bottom flask. The mixture was degassed by the freeze-pump-thaw method, and then heated at 90 °C for 20 h under N2. After cooling to room temperature, the solvent was removed under reduced pressure. The crude product was purified by column chromatography using petroleum ether/ethyl acetate = 5/1 as the eluent to give the product **S6** (1.223 g, 70% yield). 1H NMR (400 MHz, CDCl3): *δ =* 7.71 (s, 2H), 7.16 (s, 1H), 6.93 (s, 1H), 5.43 (s, 2H), 3.99 (t, *J* = 6.5 Hz, 2H), 3.89 (t, *J* = 6.4 Hz, 2H), 3.42 (s, 12H), 1.87–1.77 (m, 2H), 1.72–1.62 (m, 2H), 1.56–1.44 (m, 2H), 1.35 (q, *J* = 3.9 Hz, 6H), 1.30–1.18 (m, 4H), 0.88 (dt, *J* = 18.4, 6.9 Hz, 6H). 13C NMR (150 MHz, CDCl3): *δ* = 156.50, 150.53, 149.92, 146.95, 127.54, 121.40, 117.87, 115.94, 113.36, 104.42, 70.51, 69.40, 53.85, 31.50, 31.48, 29.22, 29.06, 25.63, 22.56, 22.46, 13.99.

**Building unit E2**. 1,4-Benzenediboronate bis(pineol)ester (165 mg, 0.5 mmol), **S6** (583 mg, 1.0 mmol), K2CO3 (415 mg, 3.0 mmol), Pd(PPh3)4 (58 mg, 0.05 mmol), 1,4-dioxane (20 mL), and H2O (5 mL) were added to a round-bottomed flask. The mixture was degassed by the freeze-pump-thaw method, and then heated to reflux for 24 h under N2. After cooling to room temperature, the solvent was removed under reduced pressure. The residue was treated with water and extracted with ethyl acetate. The organic phase was washed with brine, dried over Na2SO4, and concentrated under reduced pressure. The crude product was purified by silica gel column chromatography using petroleum ether/ethyl acetate = 4/1~3/1 as the eluent to give the building unit **E2** (384 mg, 71% yield). 1H NMR (400 MHz, CDCl3): *δ* = 7.83 (s, 4H), 7.67 (s, 4H), 7.05 (d, *J* = 3.3 Hz, 4H), 5.47 (s, 4H), 3.96 (q, *J* = 6.5 Hz, 8H), 3.45 (s, 24H), 1.72 (p, *J* = 6.8 Hz, 8H), 1.48–1.35 (m, 8H), 1.28 (dq, *J* = 9.0, 5.0, 4.3 Hz, 16H), 0.95–0.79 (m, 12H). 13C NMR (150 MHz, CDCl3): *δ* = 156.39, 150.52, 150.37, 147.44, 136.95, 132.20, 129.06, 127.31, 121.58, 115.83, 115.56, 104.49, 69.83, 69.31, 53.83, 31.55, 31.45, 29.26, 25.72, 22.56, 22.50, 14.02, 13.99. HRMS: m/z calcd for C64H93N2O12 [M + H]+: 1081.6723, found: 1081.6676.

Synthesis of building unit **E3**

**Compound S7.** Compound **S4** (530 mg, 1.0 mmol), 1,4-dibromobenzene (1.180 g, 5.0 mmol), CsF (911 mg, 6.0 mmol), PdCl2(dppf) (73 mg, 0.10 mmol), 1,4-dioxane (10 mL), and H2O (5 mL) were added to a round-bottomed flask. The mixture was degassed by the freeze-pump-thaw method, and then heated to reflux for 24 h under N2. After cooling to room temperature, the solvent was removed under reduced pressure. The residue was thoroughly washed with petroleum ether. The filtrate was concentrated under vacuum to obtain the crude product. It was purified by silica gel column chromatography using petroleum ether/ethyl acetate = 100/1 as the eluent to give the product **S7** (212 mg, 36% yield). 1H NMR (600 MHz, CDCl3): *δ* = 7.53 (d, *J* = 8.5 Hz, 4H), 7.46 (d, *J* = 8.5 Hz, 4H), 6.92 (s, 2H), 3.90 (t, *J* = 6.5 Hz, 4H), 1.67 (p, *J* = 6.8 Hz, 4H), 1.40–1.31 (m, 4H), 1.27 (dtt, *J* = 13.0, 6.7, 3.4 Hz, 8H), 0.92–0.83 (m, 6H). 13C NMR (150 MHz, CDCl3): *δ* = 150.17, 137.17, 131.15, 131.07, 129.90, 121.16, 115.89, 69.65, 31.43, 29.26, 25.74, 22.58, 13.98.

**Compound S8.** Compound **S7** (588 mg, 1.0 mmol),bis(pinacolato)diboron (533 mg, 2.1 mmol), potassium acetate (589 mg, 6.0 mmol), PdCl2(dppf) (73 mg, 0.10 mmol), and dry 1,4-dioxane (20 mL) were added to a round-bottomed flask. The mixture was degassed by the freeze-pump-thaw method, and then heated at 90 °C for 24 h under N2. After cooling to room temperature, the solvent was removed under reduced pressure. The residue was treated with water and extracted with diethyl ether. The organic phase was washed with brine, dried over Na2SO4, and concentrated under reduced pressure. The crude product was washed with a small amount of diethyl ether to remove impurities, filtered, and dried to afford the product **S8** (375 mg, 55% yield). 1H NMR (400 MHz, CDCl3): *δ* = 7.86 (d, *J* = 8.1 Hz, 4H), 7.61 (d, *J* = 8.1 Hz, 4H), 6.98 (s, 2H), 3.89 (t, *J* = 6.5 Hz, 4H), 1.73–1.60 (m, 4H), 1.37 (s, 24H), 1.25 (td, *J* = 8.4, 7.1, 5.0 Hz, 12H), 0.86 (t, *J* = 6.8 Hz, 6H). 13C NMR (100 MHz, CDCl3): *δ* = 150.38, 141.34, 134.40, 130.97, 128.86, 116.38, 83.75, 69.71, 31.45, 29.30, 25.73, 24.90, 22.59, 14.01.

**Building unit E3.** Compound **S8** (273 mg, 0.4 mmol), **S6** (489 mg, 0.84 mmol), K2CO3 (331 mg, 2.4 mmol), Pd(PPh3)4 (46 mg, 0.04 mmol), 1,4-dioxane (24 mL), and H2O (6 mL) were added to a round-bottomed flask. The mixture was degassed by the freeze-pump-thaw method, and then heated to reflux for 24 h under N2. After cooling to room temperature, the solvent was removed under reduced pressure. The residue was treated with water and extracted with ethyl acetate. The organic phase was washed with brine, dried over Na2SO4, and concentrated under reduced pressure. The crude product was purified by silica gel column chromatography using petroleum ether/ethyl acetate = 3/1 as the eluent to give the building unit **E3** (344 mg, 60% yield). 1H NMR (400 MHz, CDCl3): *δ* = 7.83 (s, 4H), 7.74–7.65 (m, 8H), 7.07 (d, *J* = 9.3 Hz, 6H), 5.47 (s, 4H), 4.03–3.92 (m, 12H), 3.45 (s, 24H), 1.73 (qd, *J* = 8.7, 7.9, 5.9 Hz, 12H), 1.42 (dt, *J* = 13.6, 7.1 Hz, 12H), 1.35–1.25 (m, 24H), 0.88 (td, *J* = 5.2, 2.9 Hz, 18H).13C NMR (150 MHz, CDCl3): *δ* = 156.38, 150.53, 150.39, 147.46, 137.26, 136.66, 132.31, 130.44, 129.09, 129.02, 127.22, 121.58, 116.21, 115.84, 115.57, 104.49, 69.83, 69.58, 69.31, 53.82, 31.55, 31.46, 29.31, 29.27, 25.76, 25.73, 22.57, 22.51, 14.02, 14.00. HRMS: m/z calcd for C88H126N2O14 [M + 2H]2+: 717.4599, found: 717.4588.

Synthesis of model compound **M1**

**Model compound** **M1.** 2,6-Pyridinedicarboxaldehyde (135 mg, 1.0 mmol), *p*-anisidine (271 mg, 2.2 mmol), *p*-toluenesulfonic acid monohydrate (19 mg, 0.1 mmol), and 25 mL toluene were added into a round bottom flask. The resulting mixture was heated at reflux for 2 h and then concentrated to remove the solvent. The crude product was recrystallized in CH3CN to give the model compound **M1** (241 mg, 70% yield). 1H NMR (500 MHz, CDCl3): *δ* = 8.71 (s, 2H), 8.24 (d, *J* = 7.8 Hz, 2H), 7.92 (s, 1H), 7.37 (d, *J* = 8.9 Hz, 4H), 6.96 (d, *J* = 8.9 Hz, 4H), 3.85 (s, 6H). 13C NMR (125 MHz, CDCl3): *δ* = 159.07, 157.66, 154.79, 143.48, 137.22, 122.80, 122.78, 114.47, 55.48.

Synthesis of model compound **M2**

**Model compound** **M2.** **M1** (69 mg, 0.2 mmol) and Zn(NO3)2•6H2O (59 mg, 0.2 mmol) were dissolved in 10 mL CH3CN. The resulting solution was stirred at room temperature for 3 h and model compound **M2** was precipitated as a pale-yellow solid by addition of Et2O. 1H NMR (500 MHz, CD3CN): *δ* = 9.01 (s, 2H), 8.49 (t, *J* = 7.8 Hz, 1H), 8.17 (d, *J* = 7.8 Hz, 2H), 7.74 (d, *J* = 9.0 Hz, 4H), 7.11 (d, *J* = 9.1 Hz, 4H), 3.88 (s, 6H). 13C NMR (125 MHz, CD3CN): *δ* = 154.08, 145.27, 130.39, 125.48, 118.31, 116.07, 56.44.

Synthesis of **SNF-LIFM1**


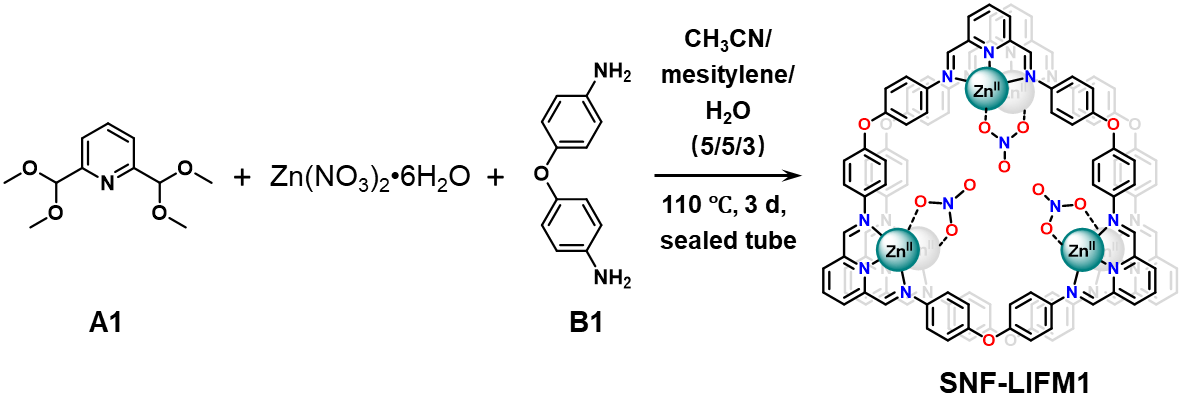


A solution of building unit **A1** (9.1 mg, 0.04 mmol) and Zn(NO3)2•6H2O (19.0 mg, 0.064 mmol) in CH3CN (0.5 mL) was added into a 10 mL ampoule. To the mixture, building unit **B1** (8.0 mg, 0.04 mmol), mesitylene (0.5 mL), and deionized water (0.3 mL) were added. The ampoule was then flash frozen in a liquid N2 bath, vacuumed, and flame sealed. After warming to room temperature, the ampoule was placed into an oven and heated at 110 °C for 2 days, resulting in the formation of an orange solid. While the mixture was still warm, the ampoule was opened and the solid was transferred into a centrifugal tube. The solid was then separated by centrifugation and thoroughly washed with DMSO, THF, CH3CN, and Et2O. Further purification of SNF-LIFM1 was carried out by Soxhlet extraction in THF for 24 h. After drying at room temperature, the solid was further dried under vacuum at 100 °C for 12 h, yielding SNF-LIFM1 as an orange solid (14.8 mg, 76% yield).

Synthesis of **CNF-LIFM1**


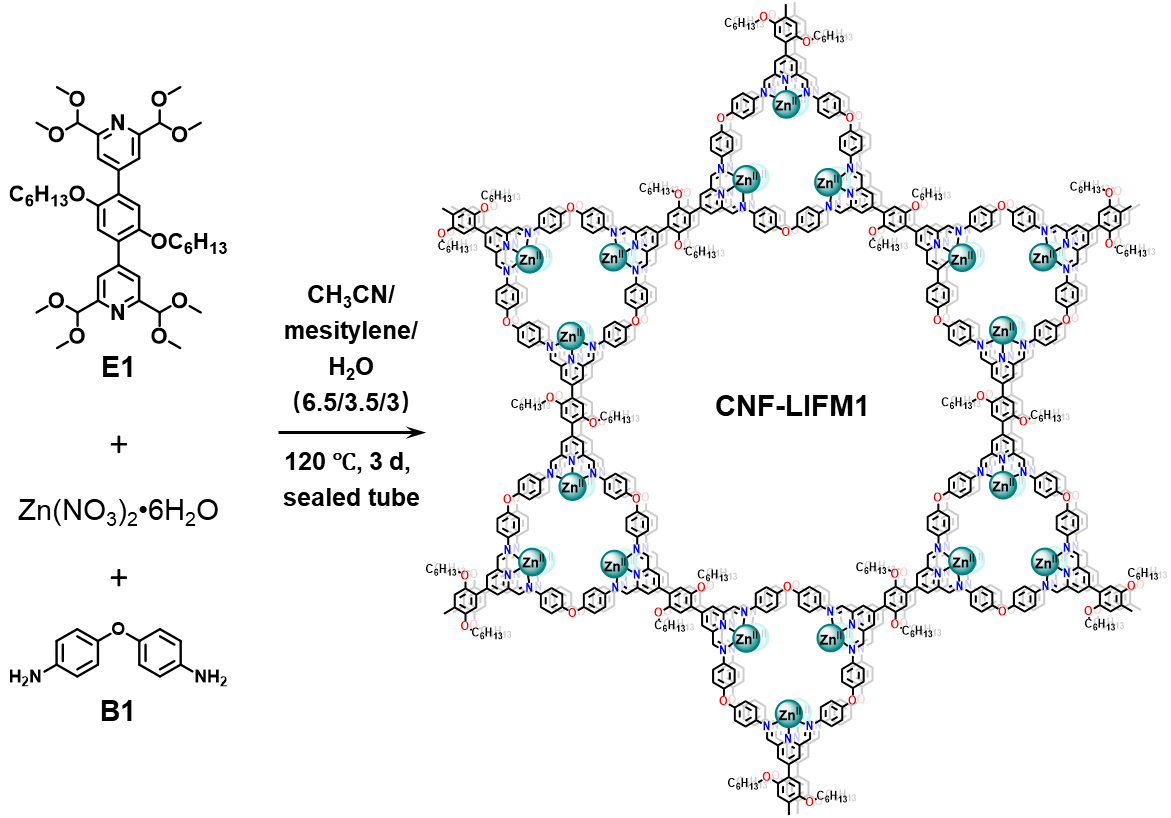


Building unit **E1** (11.7 mg, 0.016 mmol) was weighed into a 10 mL ampoule. Zn(NO3)2•6H2O (17.1 mg, 0.0576 mmol) in CH3CN (0.65 mL) was added affording a clear solution. To the mixture, building unit **B1** (6.4 mg, 0.032 mmol), mesitylene (0.35 mL), and deionized water (0.3 mL) were added. The ampoule was then flash frozen in a liquid N2 bath, vacuumed, and flame sealed. After warming to room temperature, the ampoule was placed into an oven and heated at 120 °C for 3 days, resulting in the formation of an orange solid. While the mixture was still warm, the ampoule was opened and the solid was transferred into a centrifugal tube. The solid was then separated by centrifugation and thoroughly washed with DMSO, THF, CH3CN, and Et2O. Further purification of CNF-LIFM1 was carried out by Soxhlet extraction in THF for 24 h. After drying at room temperature, the solid was further dried under vacuum at 100 °C for 12 h, yielding CNF-LIFM1 as an orange solid (17.5 mg, 88% yield).

Synthesis of **CNF-LIFM2**


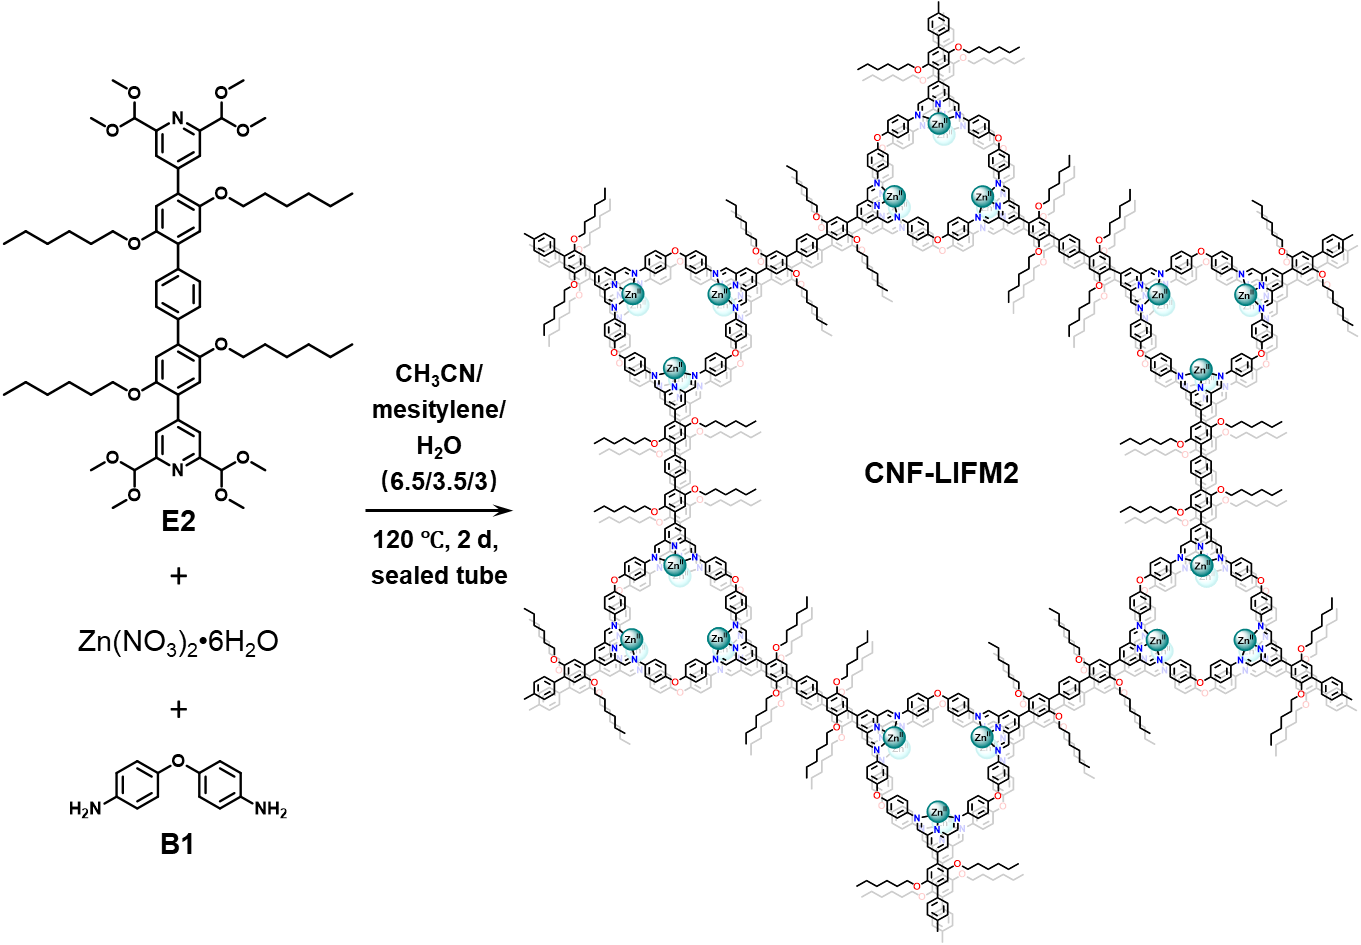


Building unit **E2** (17.3 mg, 0.016 mmol) was weighed into a 10 mL ampoule. Zn(NO3)2•6H2O (17.1 mg, 0.0576 mmol) in CH3CN (0.65 mL) was added. To the mixture, building unit **B1** (6.4 mg, 0.032 mmol), mesitylene (0.35 mL), and deionized water (0.3 mL) were added. The ampoule was then flash frozen in a liquid N2 bath, vacuumed, and flame sealed. After warming to room temperature, the ampoule was placed into an oven and heated at 120 °C for 2 days, resulting in the formation of a brick red solid. While the mixture was still warm, the ampoule was opened and the solid was transferred into a centrifugal tube. The solid was then separated by centrifugation and thoroughly washed with DMSO, THF, CH3CN, and Et2O. Further purification of CNF-LIFM2 was carried out by Soxhlet extraction in THF for 24 h. After drying at room temperature, the solid was further dried under vacuum at 100 °C for 12 h, yielding CNF-LIFM2 as a brick red solid (21.6 mg, 84% yield).

Synthesis of **CNF-LIFM3**


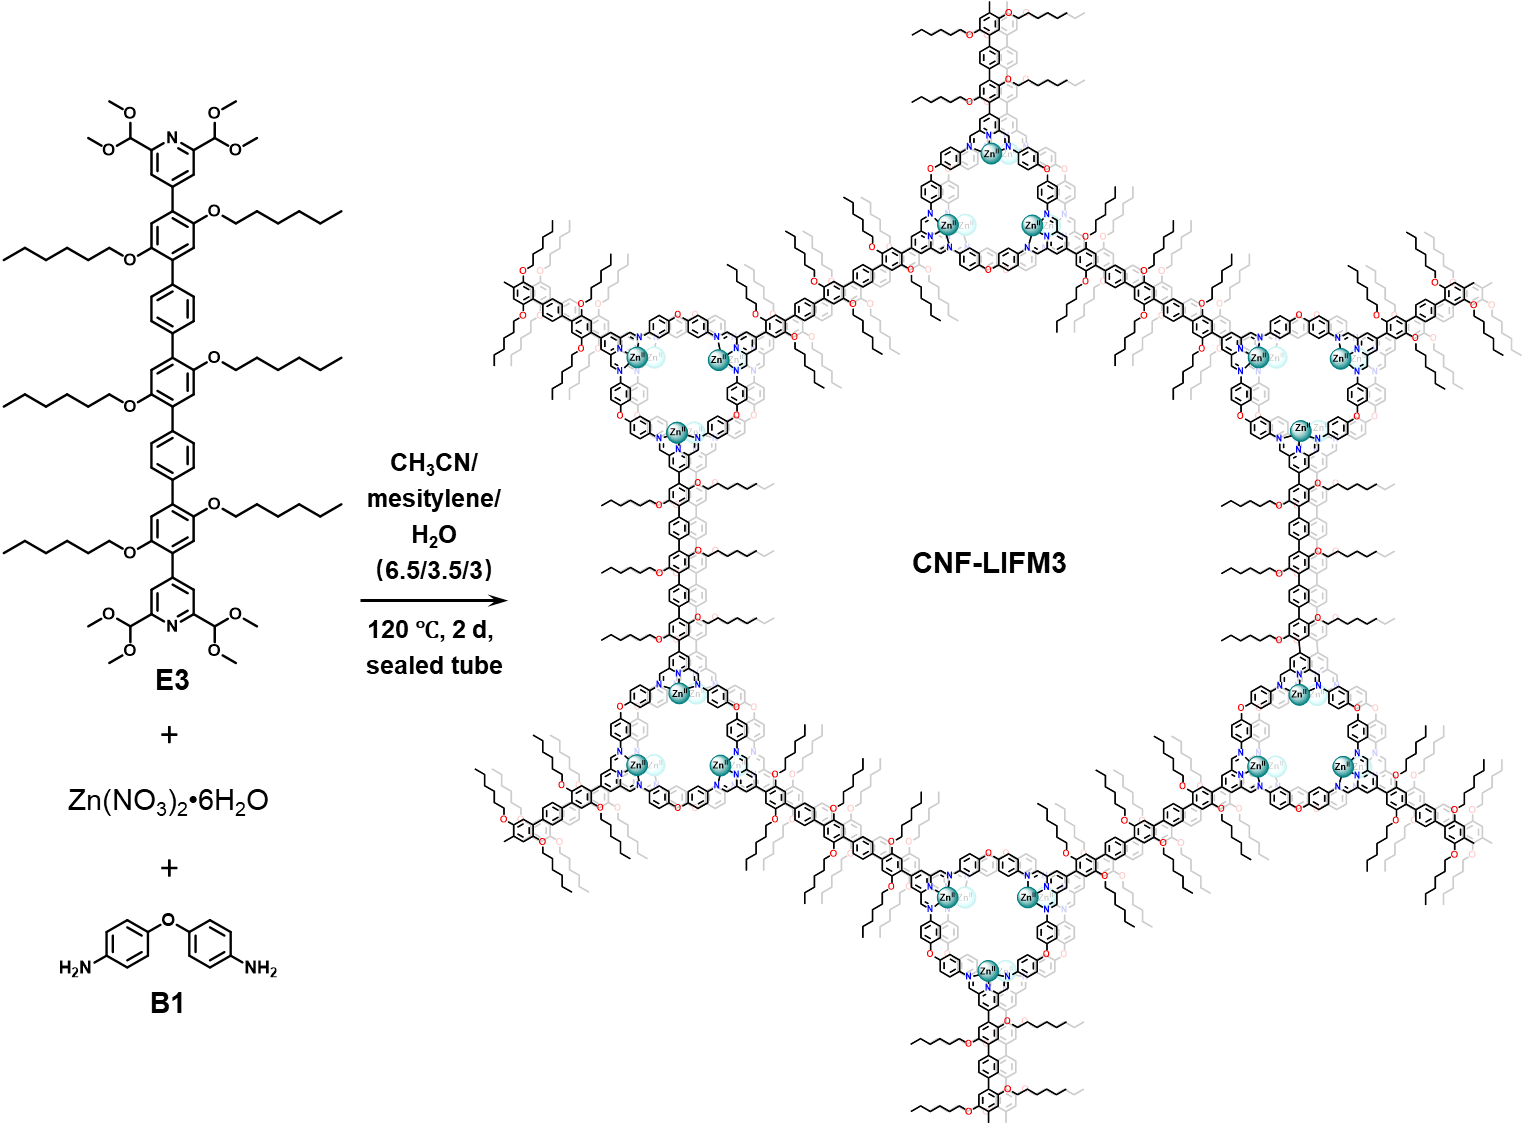


Building unit **E3** (22.9 mg, 0.016 mmol) was weighed into a 10 mL ampoule. Zn(NO3)2•6H2O (17.1 mg, 0.0576 mmol) in CH3CN (0.65 mL) was added. To the mixture, building unit **B1** (6.4 mg, 0.032 mmol), mesitylene (0.35 mL), and deionized water (0.3 mL) were added. The ampoule was then flash frozen in a liquid N2 bath, vacuumed, and flame sealed. After warming to room temperature, the ampoule was placed into an oven and heated at 120 °C for 2 days, resulting in the formation of a brick red solid. While the mixture was still warm, the ampoule was opened and the solid was transferred into a centrifugal tube. The solid was then separated by centrifugation and thoroughly washed with DMSO, THF, CH3CN, and Et2O. Further purification of CNF-LIFM3 was carried out by Soxhlet extraction in THF for 24 h. After drying at room temperature, the solid was further dried under vacuum at 100 °C for 12 h, yielding CNF-LIFM3 as a brick red solid (24.7 mg, 79% yield).

Synthetic procedures for demetalation and remetalation

**Demetalation:** The sample powder (20 mg) and 2.0 mL EtOH were placed into a 10 mL vial. After a brief sonication, 2.0 mL ammonia was added into the mixture. A remarkable change in color was observed immediately, indicating the removal of Zn2+. Allow the reaction to stand for a duration of 0.5-2 h to ensure that Zn2+ ions were fully removed. Subsequently, the material was thoroughly washed with DI H2O. After drying at 100 °C for 6 h, the demetalated material was obtained as a pale-yellow solid.


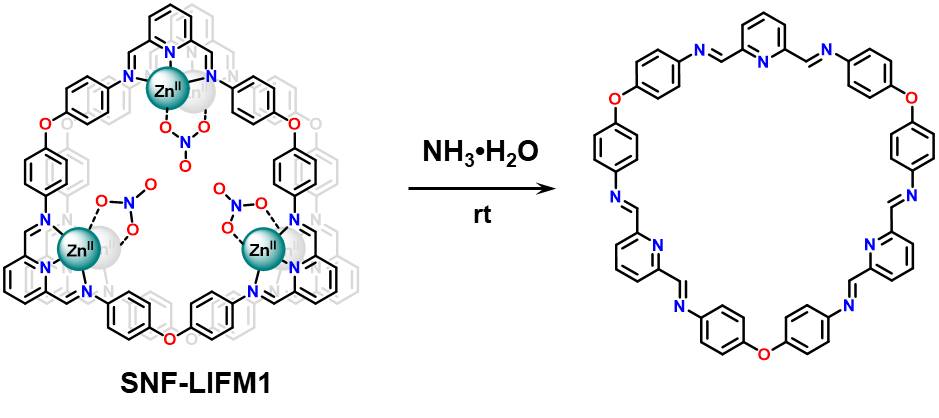


In the case of SNF-LIFM1, the demetalated material lost its crystallinity. However, the demetalated materials of CNF-LIFMs exhibited good crystallinities, and these materials were named COF-LIFMs.

**Remetalation:** The demetalated materials (COF-LIFM**s**) could be remetalated by adding a CH3CN solution of Zn(NO3)2•6H2O. Almost simultaneously, the color changed from pale-yellow to the original material’s color. After 30 minutes, the solid was separated by centrifugation and thoroughly washed with CH3CN and Et2O. Upon drying at room temperature, the remetalated material was obtained.


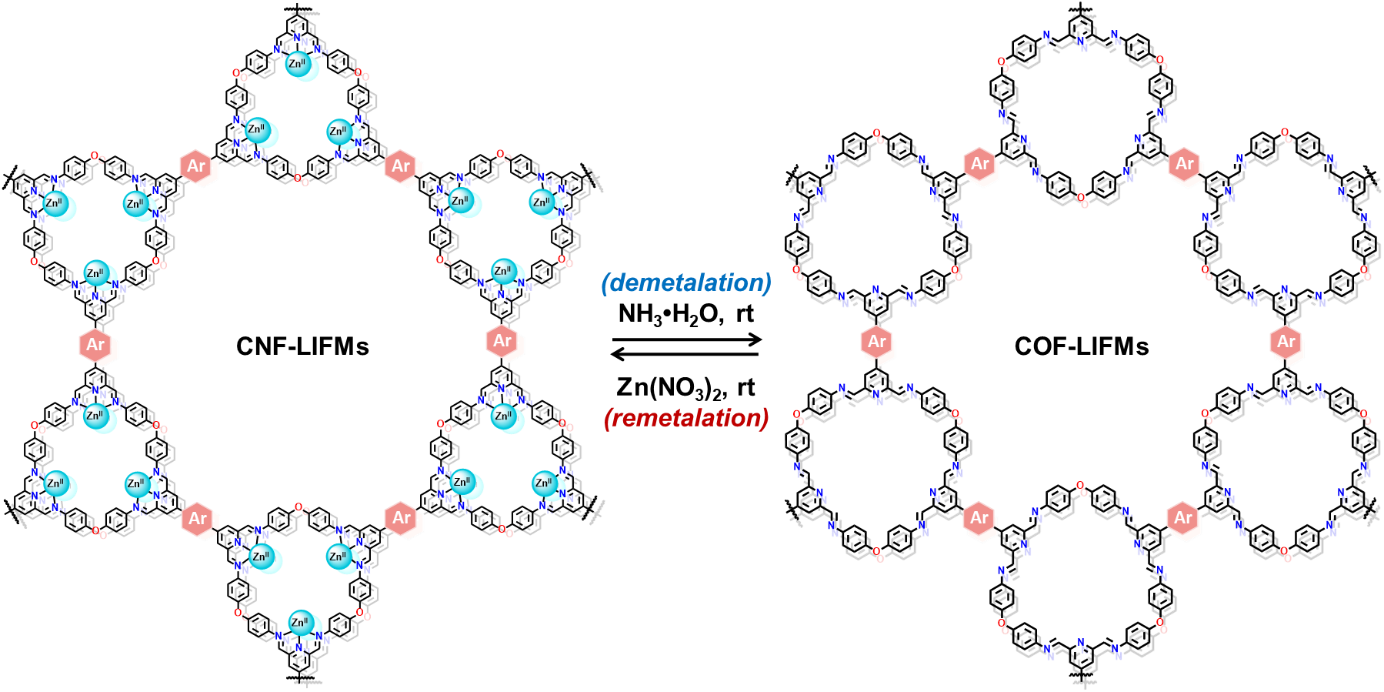


**Supplementary Figures and Tables**

**
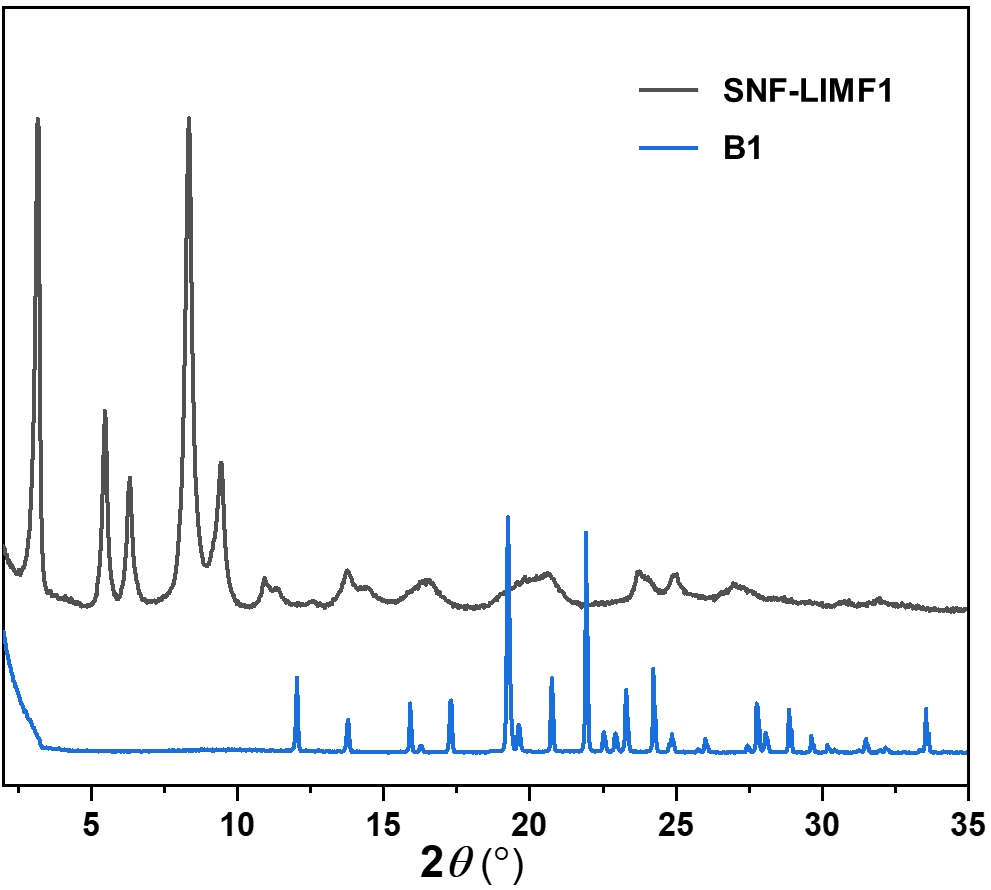
**

**Supplementary Figure 1 |** PXRD patterns of SNF-LIFM1 and building unit **B1**. As building unit **A1** is an oily substance, we did not perform PXRD testing on it.

**
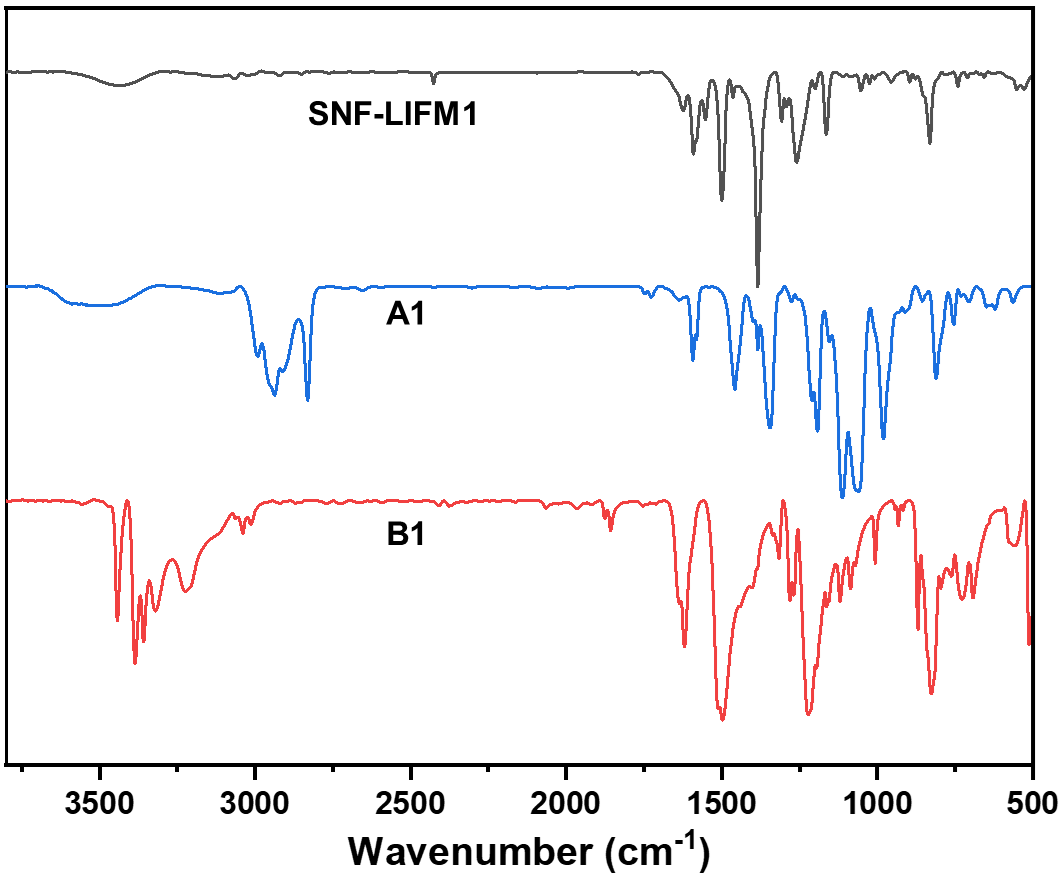
**

**Supplementary Figure 2 |** FT-IR spectra of SNF-LIFM1, building unit **A1**, and building unit **B1**.

**
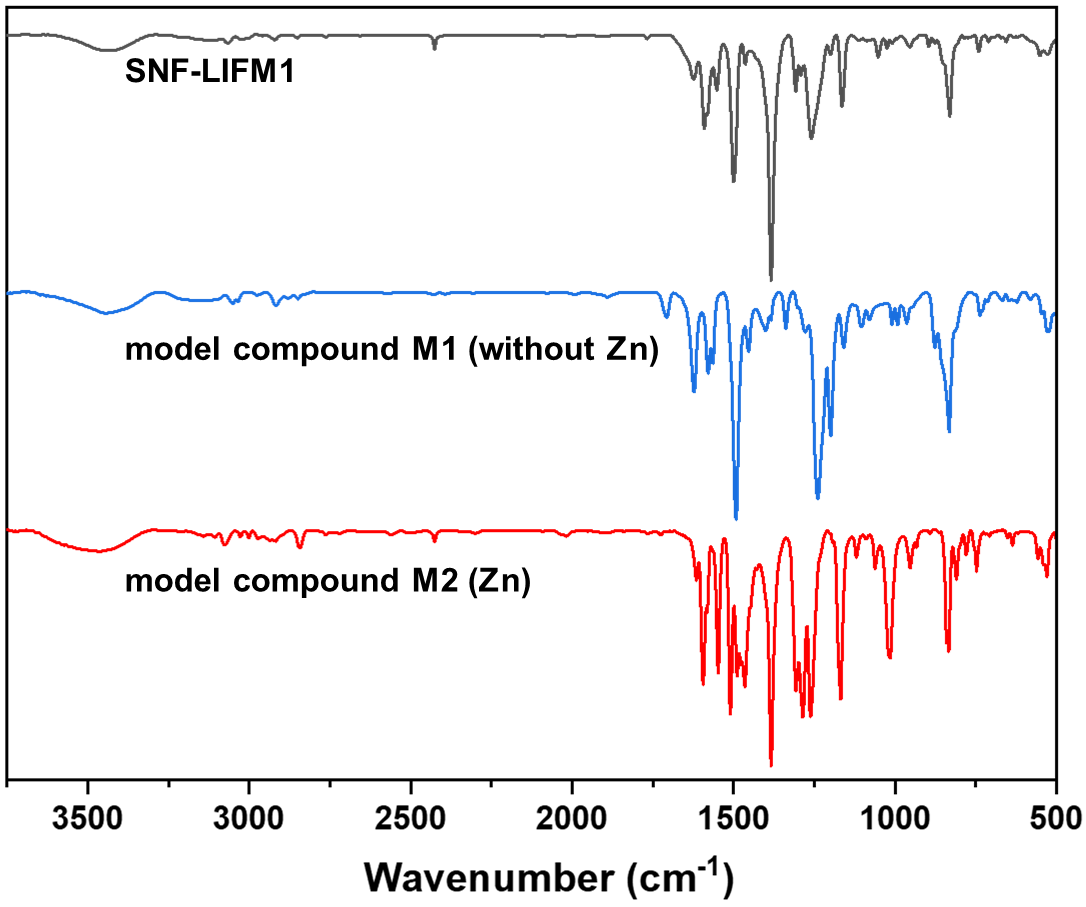
**

**Supplementary Figure 3 |** FT-IR spectra of SNF-LIFM1, model compound **M1**, and model compound **M2**.

**
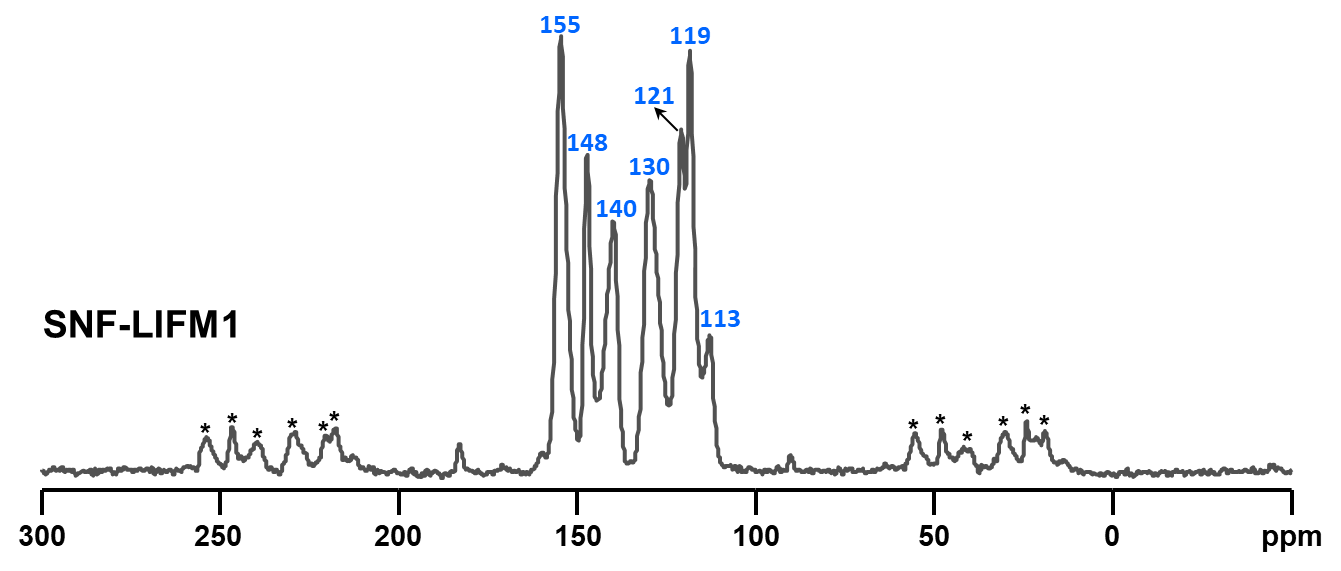
**

**Supplementary Figure 4 |** Thesolid state 13C cross polarization/magic-angle spinning (13C CP/MAS) NMR spectrum of SNF-LIFM1. The asterisks denote the spinning sidebands.


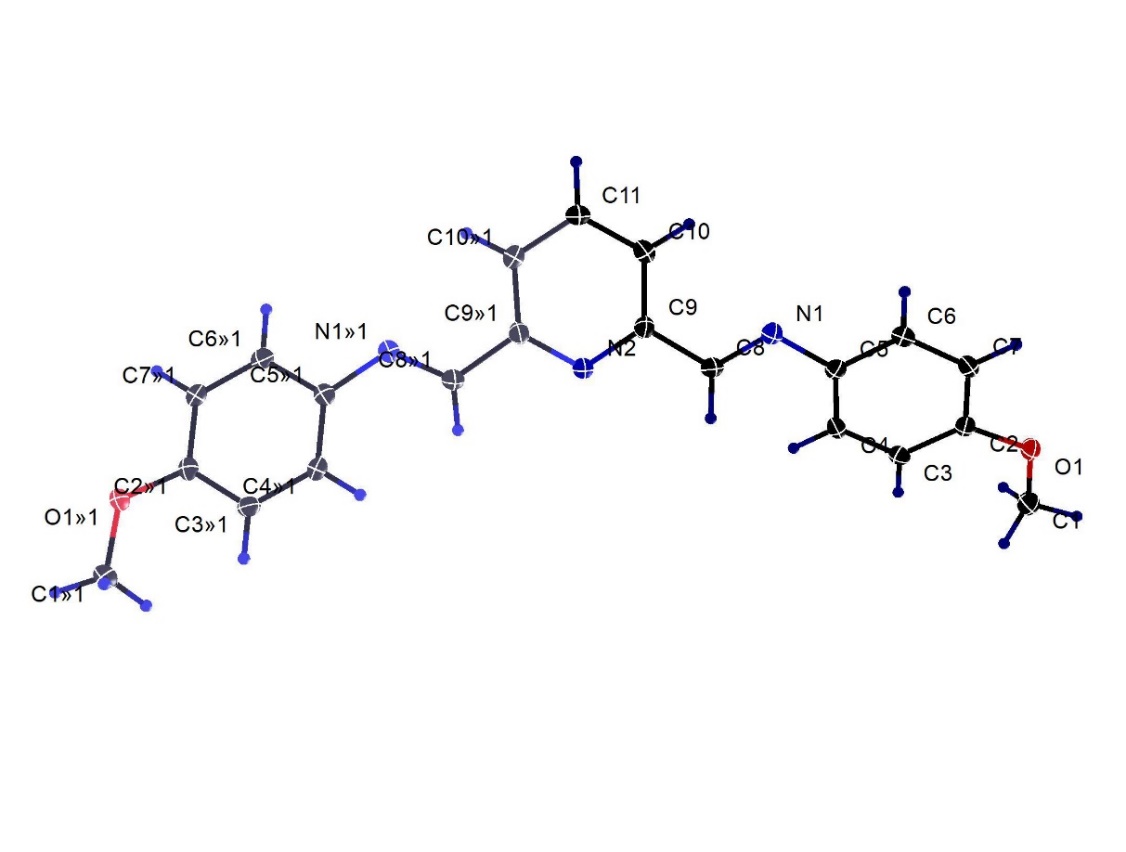


**Supplementary Figure 5 |** The single crystal structure of model compound **M1**. Metrical parameters can be obtained from the Cambridge Crystallographic Database Centre (CCDC 2282802).


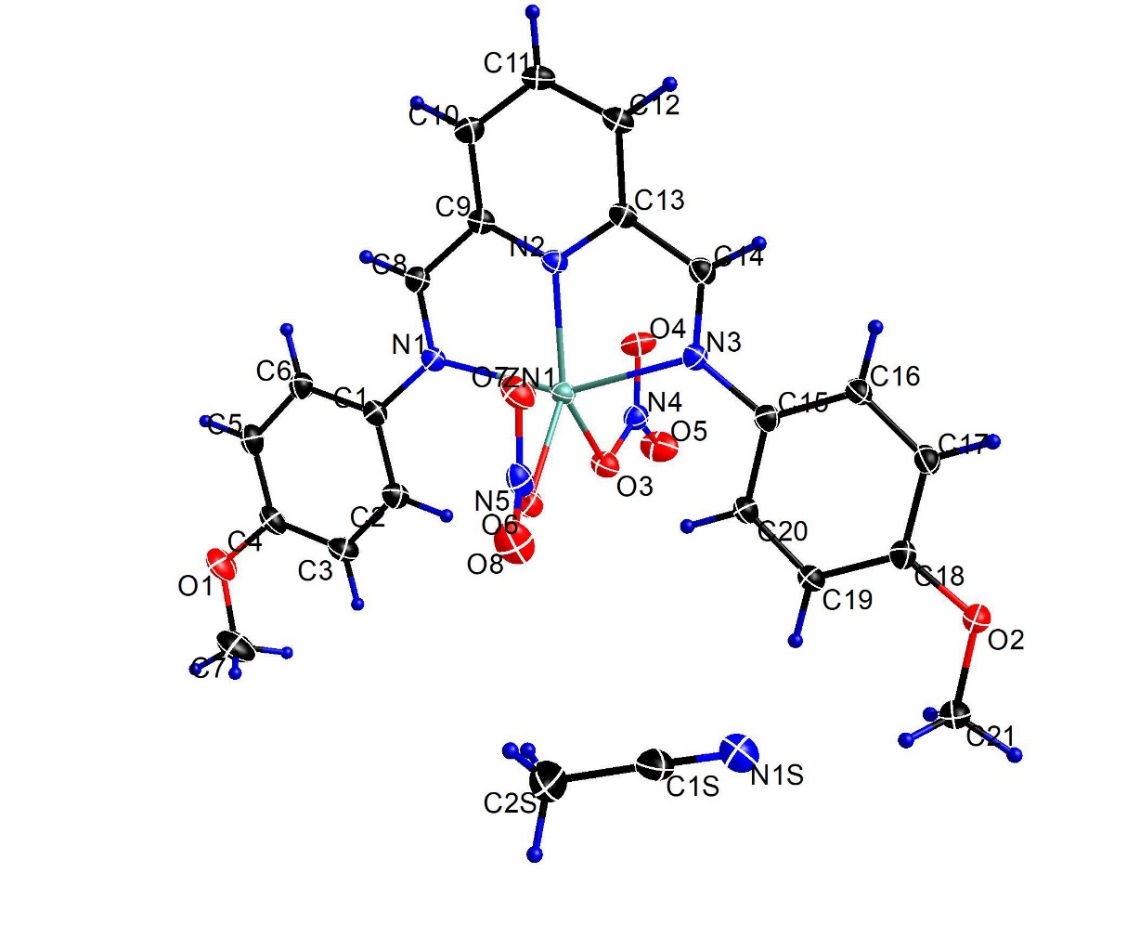


**Supplementary Figure 6 |** The single crystal structure of model compound **M2**. Metrical parameters can be obtained from the Cambridge Crystallographic Database Centre (CCDC 2282805).

**Supplementary Table 1.** Crystal data and structure refinement for model compound **M1**.

| Empirical formula | C21H19N3O2 |
| --- | --- |
| Formula weight | 345.39 |
| Temperature | 100(2) K |
| Wavelength | 1.54178 Å |
| Crystal system | Orthorhombic |
| Space group | Aba2 |
| Unit cell dimensions | *a* = 6.9993(5) Å *α* = 90°  *b* = 40.218(3) Å *β* = 90°  *c* = 6.3043(5) Å *γ* = 90° |
| Volume | 1774.7(2) Å3 |
| Z | 4 |
| Density (calculated) | 1.293 g/cm3 |
| Crystal size | 0.374 × 0.069 × 0.017 mm3 |
| Reflections collected | 6678 |
| Independent reflections | 1548 [*R*int = 0.0270] |
| Data/restraints/parameters | 1548/1/120 |
| Goodness-of-fit on F2 | 1.064 |
| Final *R* indices [I>2sigma(I)] | *R*1 = 0.0256, *wR*2 = 0.0693 |
| *R* indices (all data) | *R*1 = 0.0259, *wR*2 = 0.0695 |

**Supplementary Table 2.** Crystal data and structure refinement for model compound **M2**.

| Empirical formula | C23H22N6O8Zn |
| --- | --- |
| Formula weight | 575.83 |
| Temperature | 100(2) K |
| Wavelength | 0.71073 Å |
| Crystal system | Triclinic |
| Space group | P-1 |
| Unit cell dimensions | *a* = 9.5424(3) Å *α* = 78.5180(10)°  *b* = 10.2725(3) Å *β* = 89.0870(10)°  *c* = 13.0732(4) Å *γ* = 76.5930(10)° |
| Volume | 1221.01(6) Å3 |
| Z | 2 |
| Density (calculated) | 1.566 g/cm3 |
| Crystal size | 0.443 × 0.291 × 0.088 mm3 |
| Reflections collected | 26746 |
| Independent reflections | 6814 [*R*int = 0.0277] |
| Data/restraints/parameters | 6814/0/346 |
| Goodness-of-fit on F2 | 1.043 |
| Final *R* indices [I>2sigma(I)] | *R*1 = 0.0255, *wR*2 = 0.0629 |
| *R* indices (all data) | *R*1 = 0.0286, *wR*2 = 0.0649 |

**
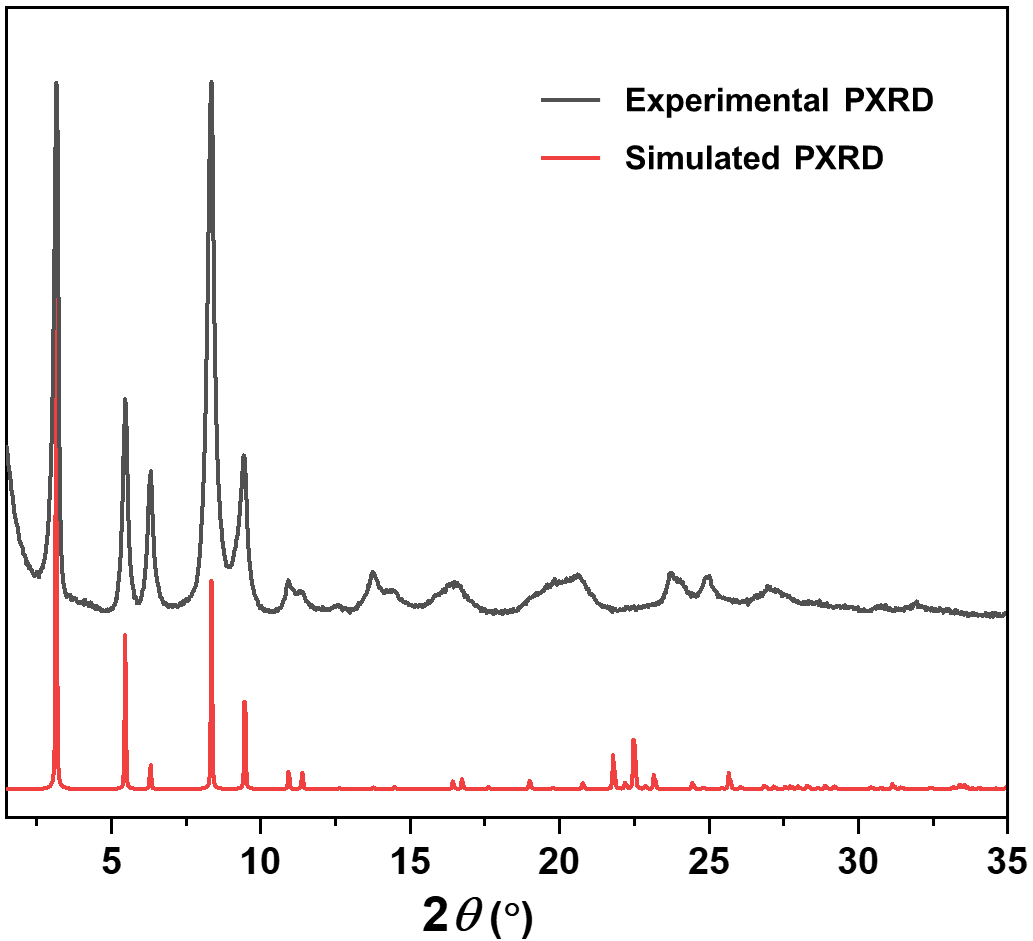
**

**Supplementary Figure 7 |** The simulated and experimental PXRD patterns of SNF-LIFM1. The differences in relative intensities of experimental and simulated PXRD patterns are attributed to the preferential orientation growth of the crystals.


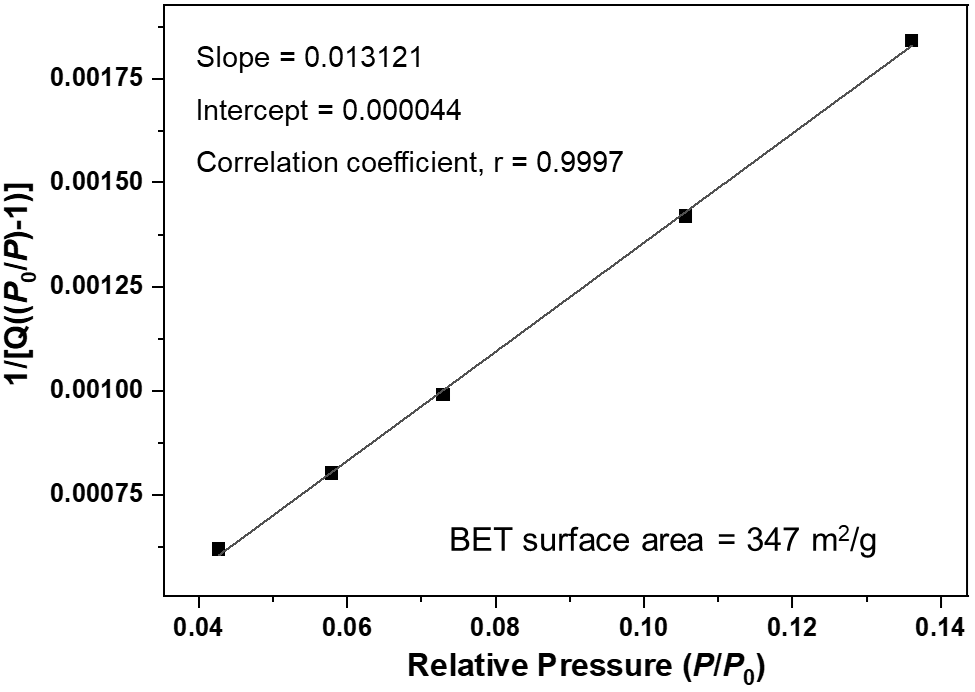


**Supplementary Figure 8 |** The BET surface area plot for SNF-LIFM1 calculated from CO2 adsorption data at 195 K.

**
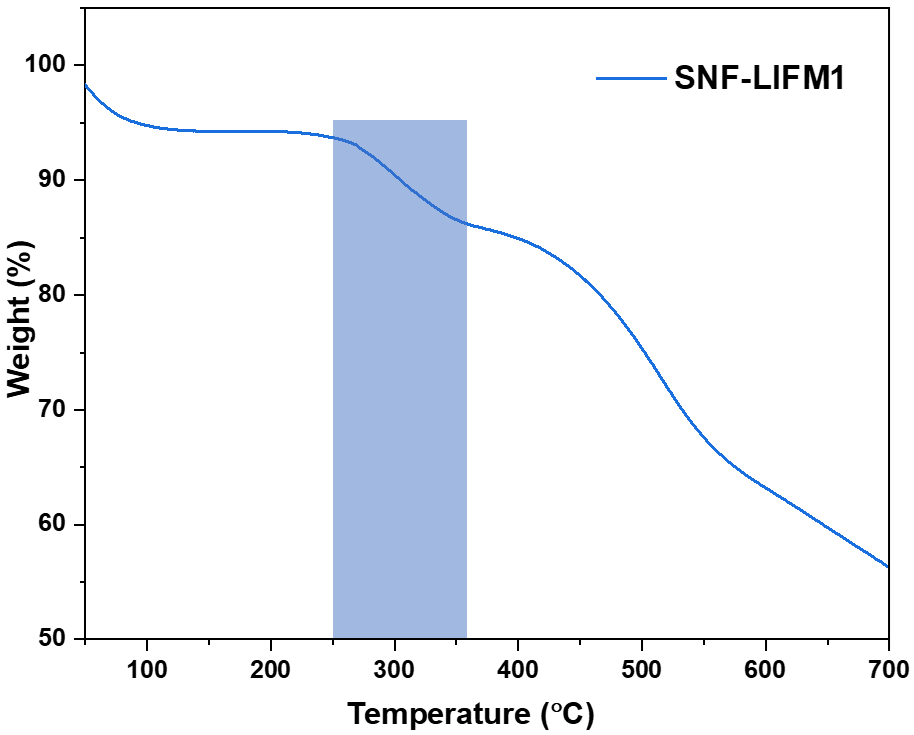
**

**Supplementary Figure 9 |** TheTGA curve of SNF-LIFM1 under N2 atmosphere. The weight loss between 250 °C and 360 °C is attributed to the decomposition of nitrate.


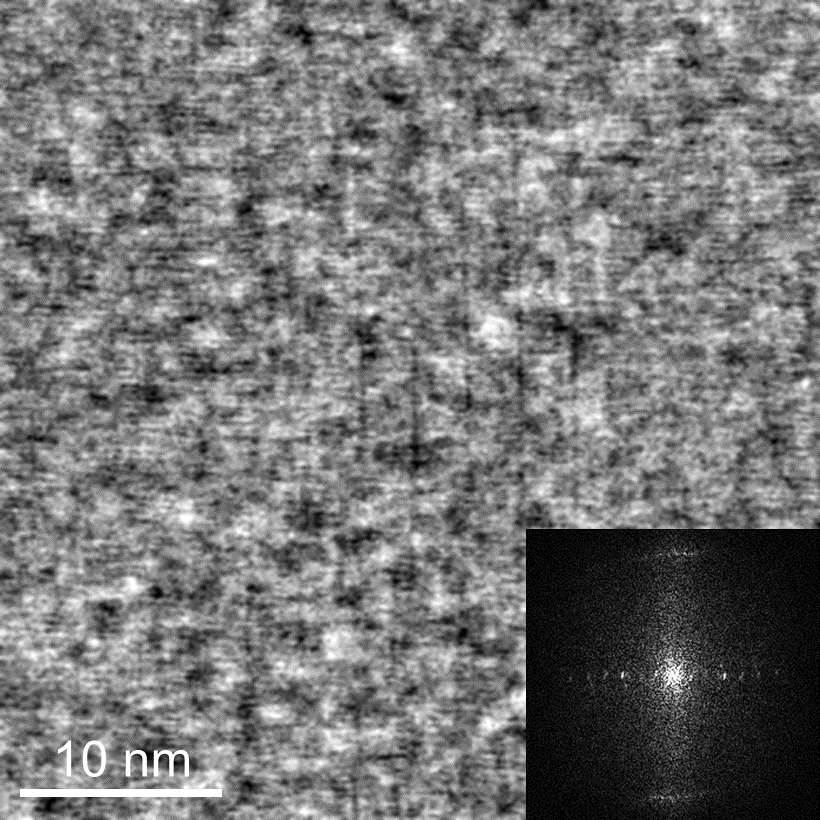


**Supplementary Figure 10 |** The iDPC-STEM image of SNF-LIFM1 along the [100] direction shows the packing of the pillars as well as the ~4 Å periodicity within the pillars stemming from the stacking of the metallacycles. Fourier transform shows as inset.


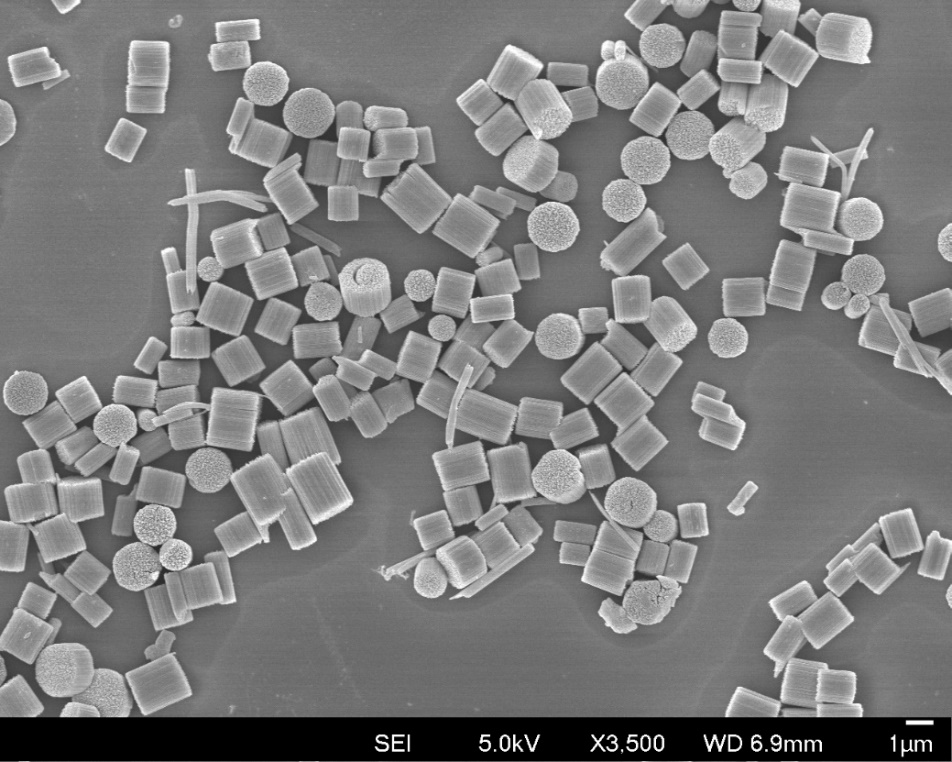


**Supplementary Figure 11 |** The SEM image of SNF-LIFM1.


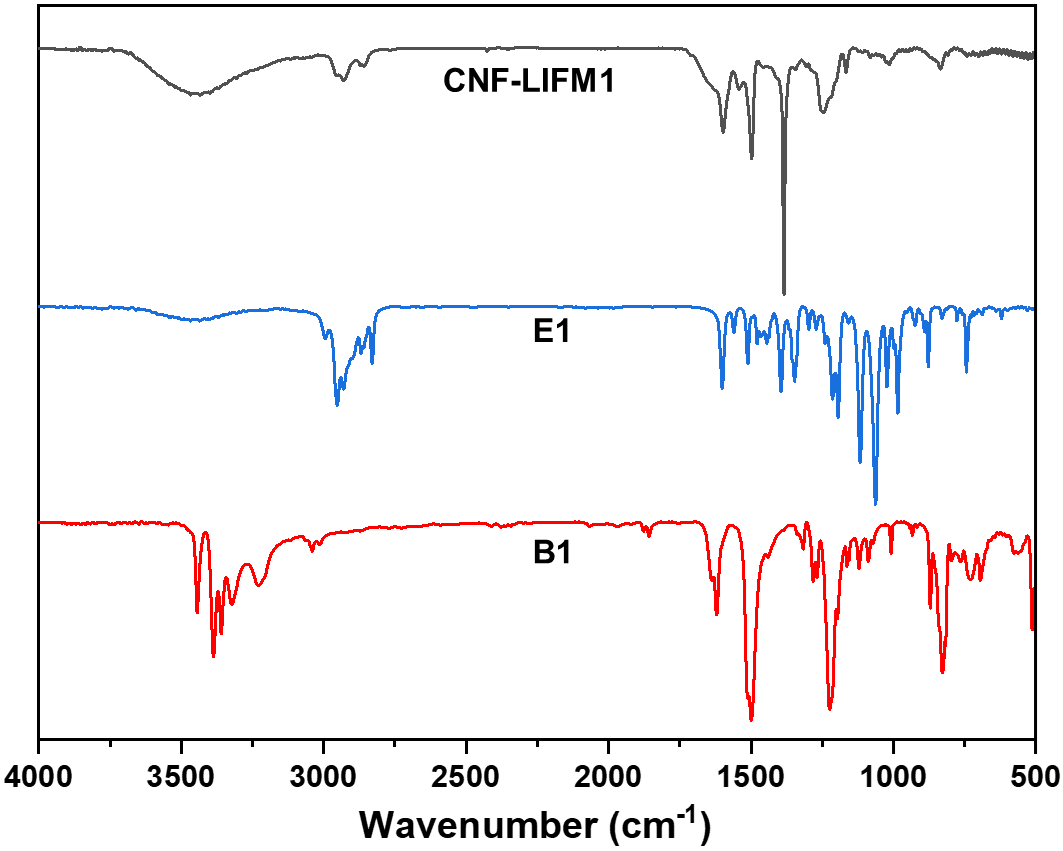


**Supplementary Figure 12 |** FT-IR spectra of CNF-LIFM1, building unit **E1**, and building unit **B1**.


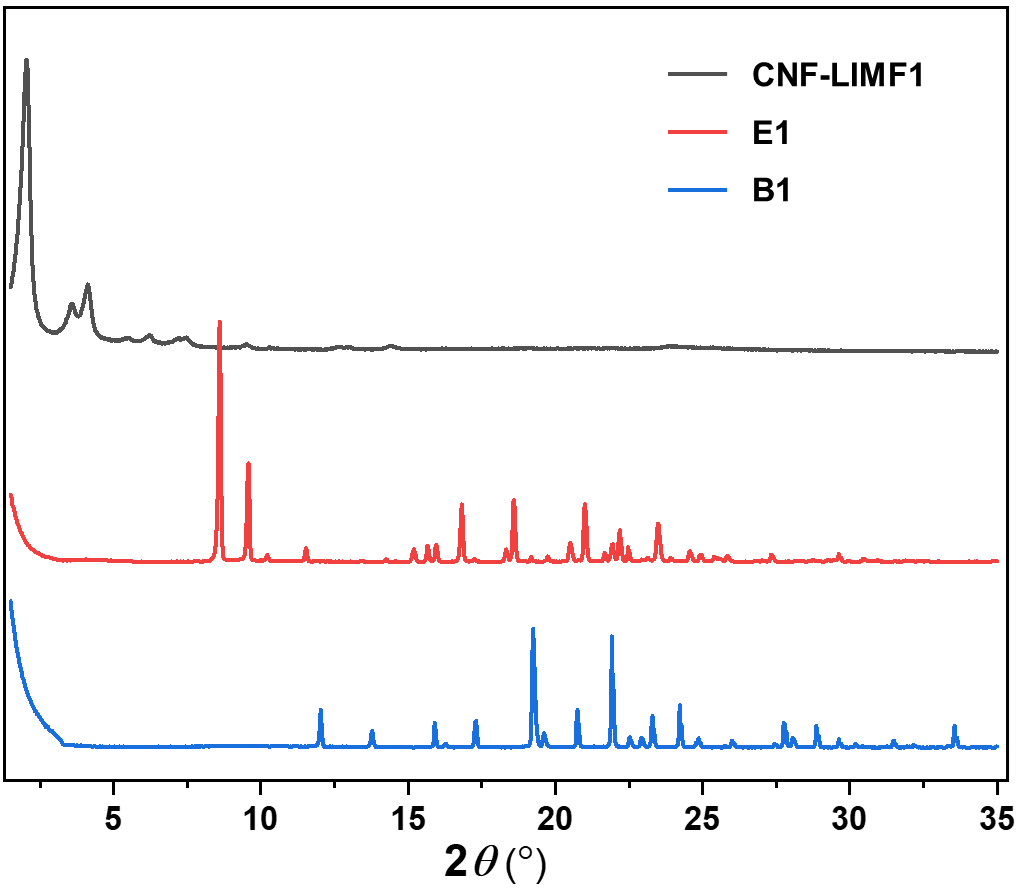


**Supplementary Figure 13 |** PXRD patterns of CNF-LIFM1, building unit **E1**, and building unit **B1**.


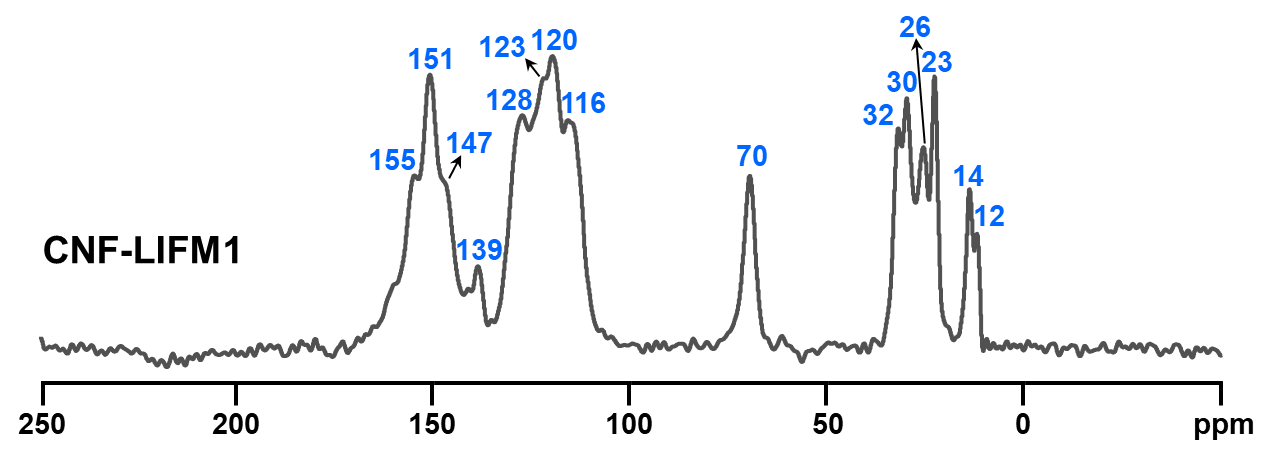


**Supplementary Figure 14 |** Thesolid state 13C cross polarization/total sideband suppression (13C CP/TOSS) NMR spectrum of CNF-LIFM1.

**
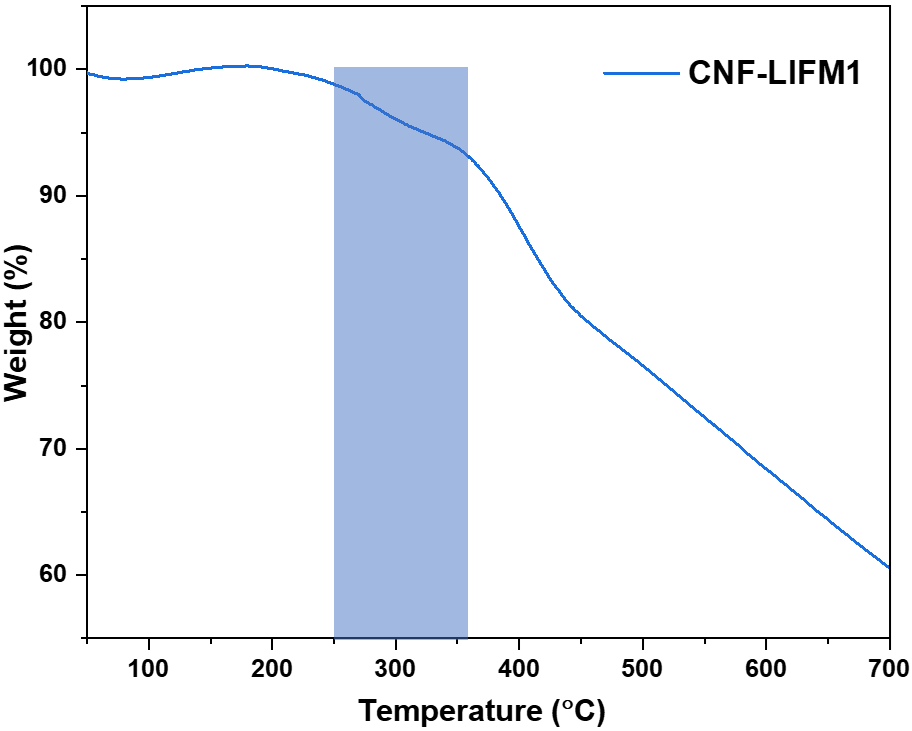
**

**Supplementary Figure 15 |** TheTGA curve of CNF-LIFM1 under N2 atmosphere. The weight loss between 250 °C and 360 °C is attributed to the decomposition of nitrate.

**
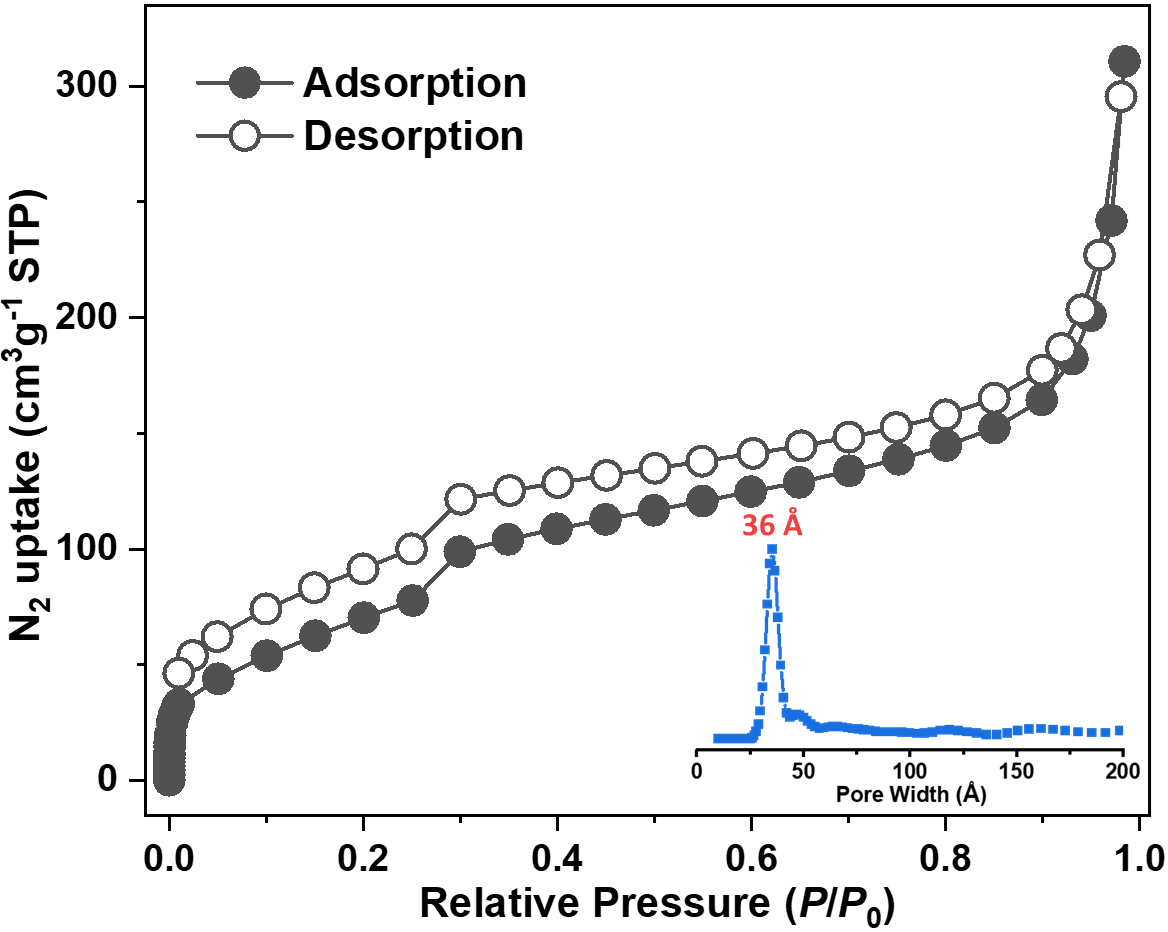
**

**Supplementary Figure 16 |** The N2 adsorption‒desorption isotherm line of CNF-LIFM1. Inset shows the pore size distribution of CNF-LIFM1 calculated by QSDFT.

**
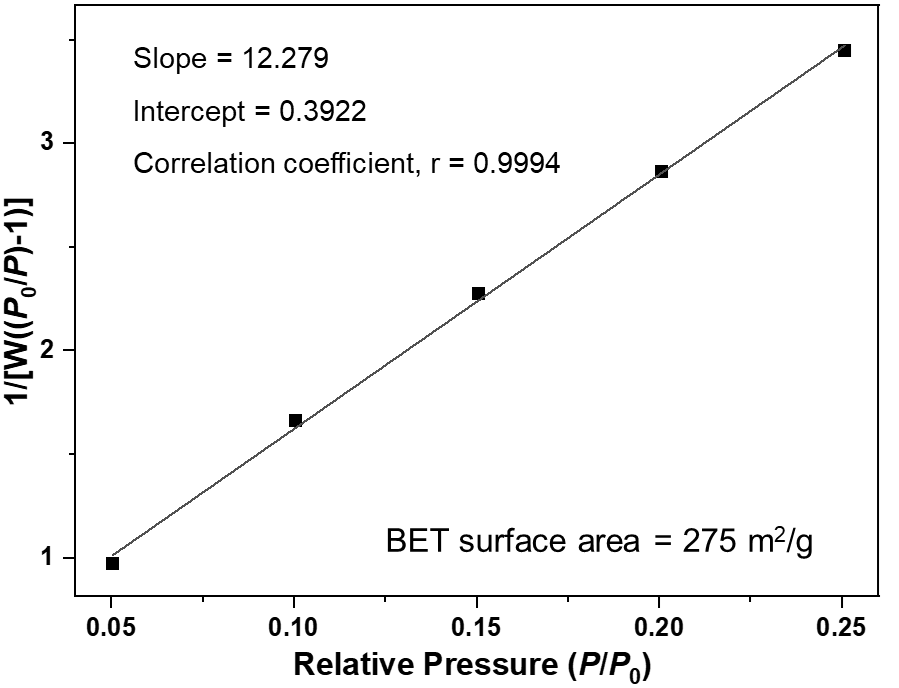
**

**Supplementary Figure 17 |** The BET surface area plot for CNF-LIFM1 calculated from N2 adsorption data.


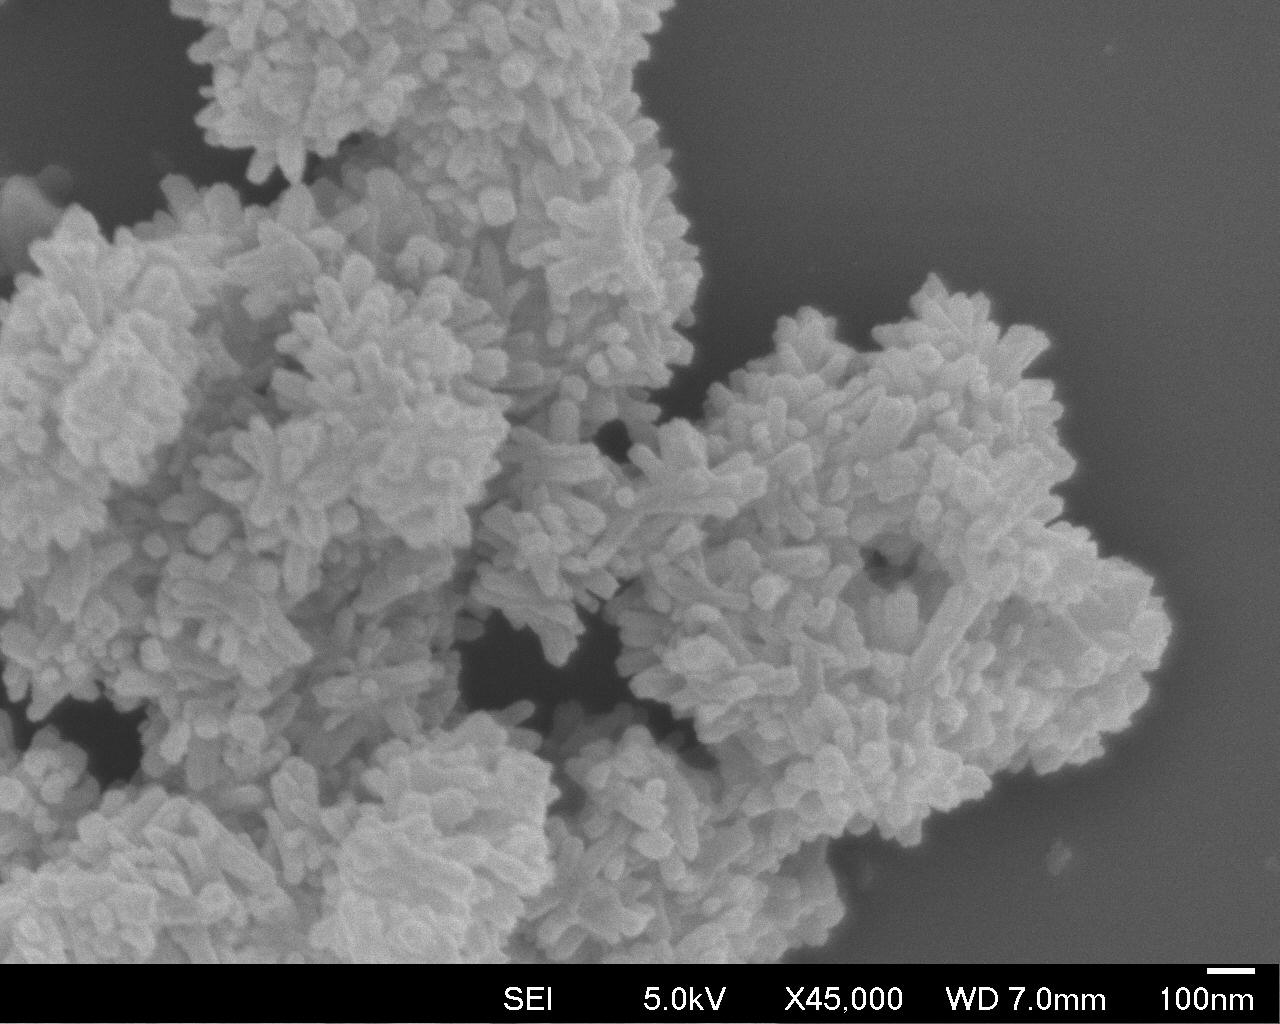


**Supplementary Figure 18 |** The SEM image of CNF-LIFM1.


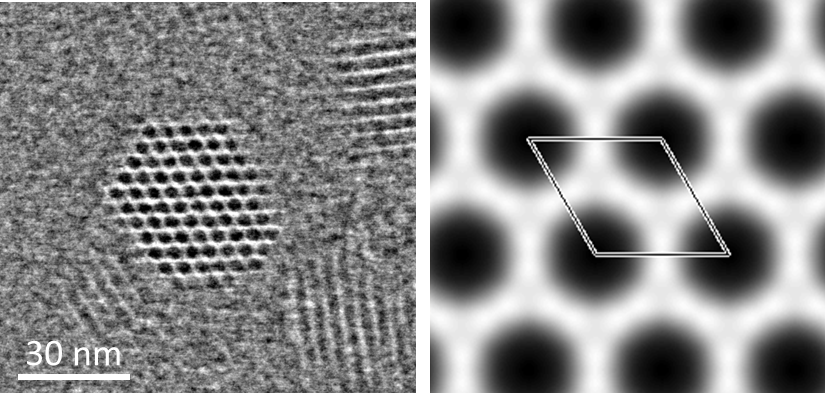


**Supplementary Figure 19 |** The iDPC-STEM image of CNF-LIFM1 along the [001] direction (left). The lattice averaged projected potential map with *p*3 plane group symmetry imposed (right).


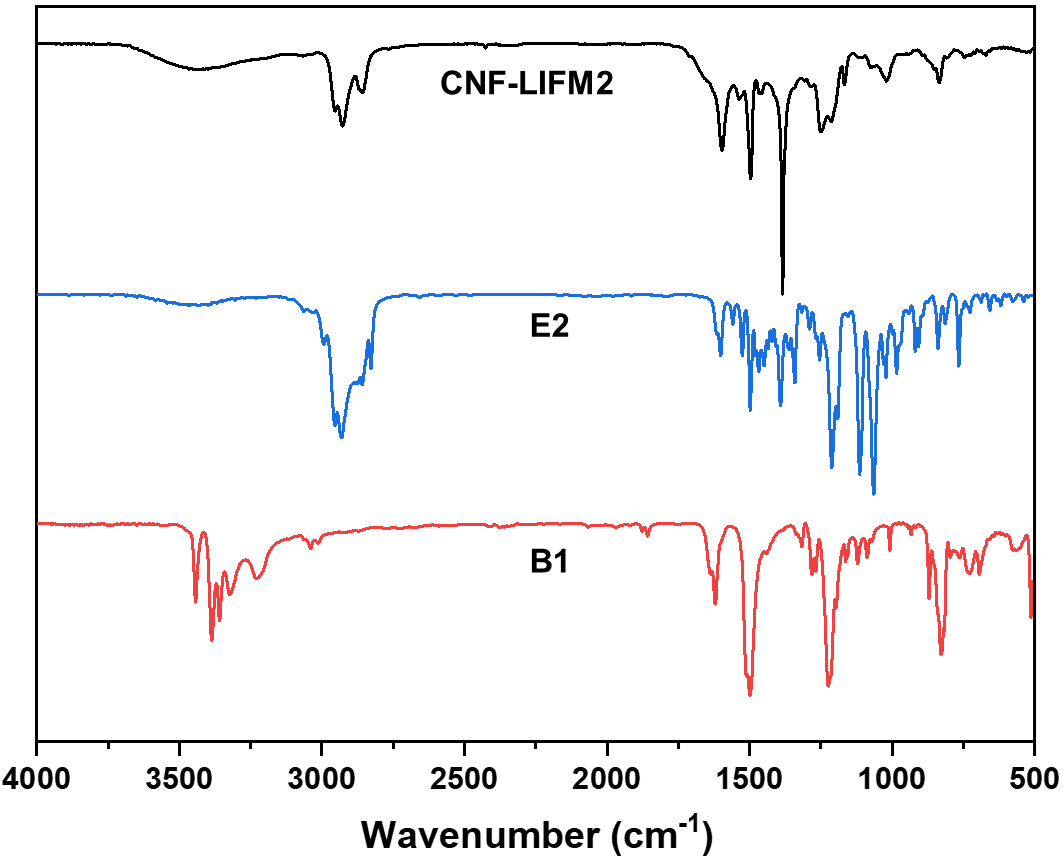


**Supplementary Figure 20 |** FT-IR spectra of CNF-LIFM2, building unit **E2**, and building unit **B1**.

**
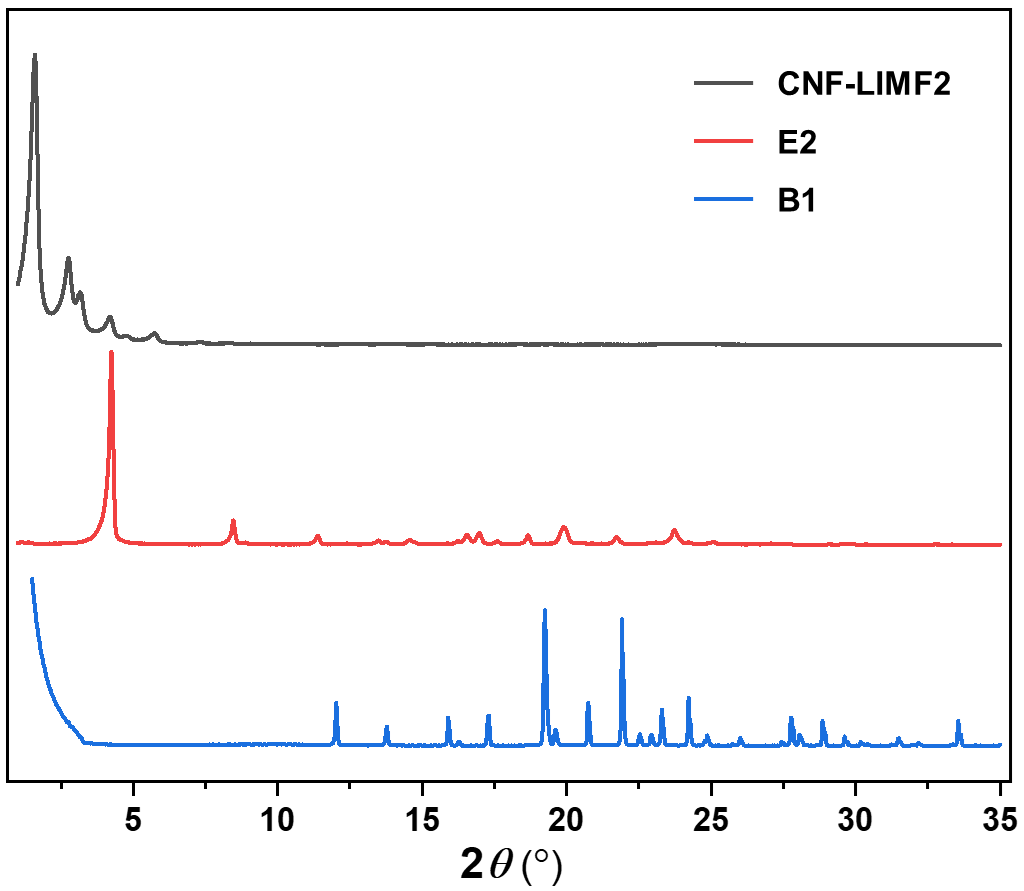
**

**Supplementary Figure 21 |** PXRD patterns of CNF-LIFM2, building unit **E2**, and building unit **B1**.


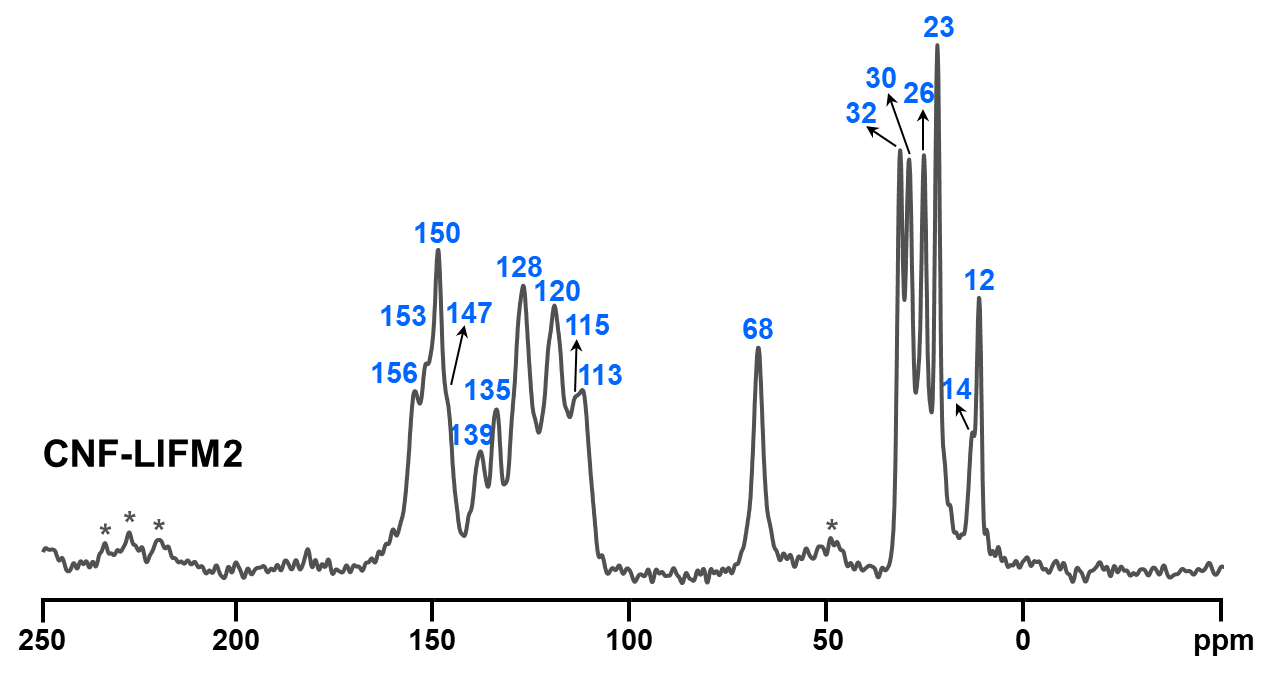


**Supplementary Figure 22 |** The13C CP/MAS NMR spectrum of CNF-LIFM2.


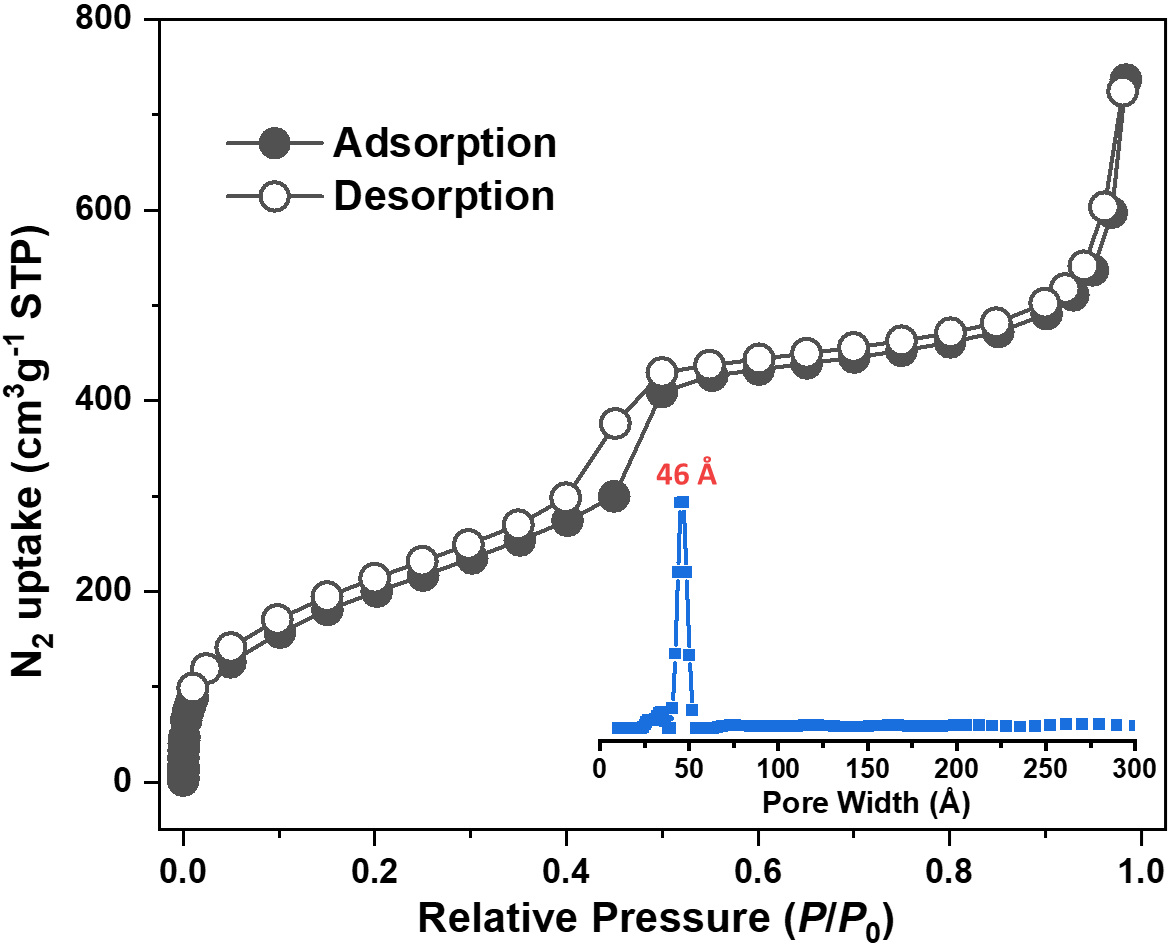


**Supplementary Figure 23 |** The N2 adsorption‒desorption isotherm line of CNF-LIFM2. Inset shows the pore size distribution of CNF-LIFM2 calculated by QSDFT.


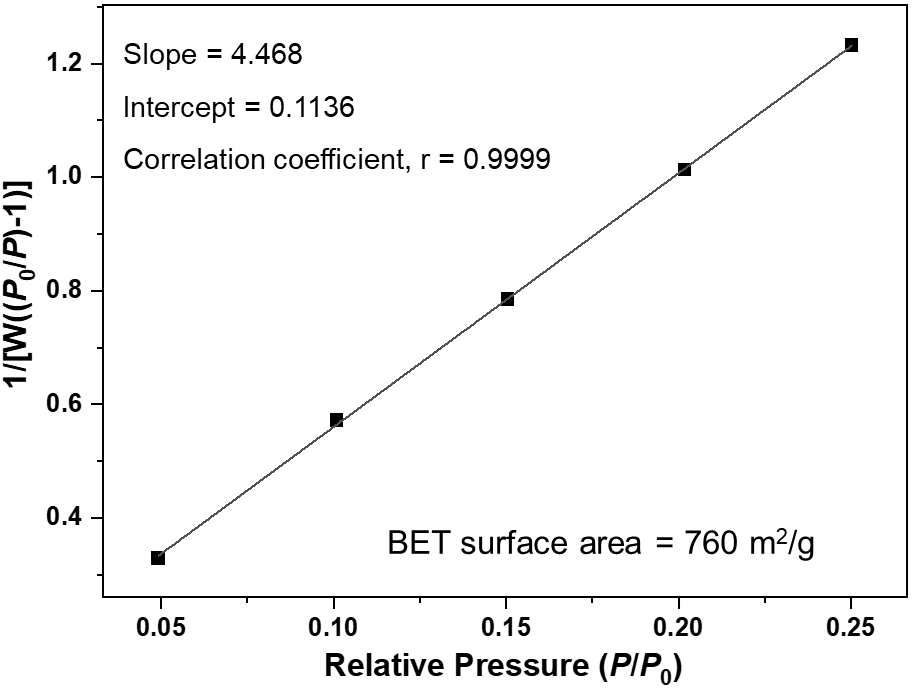


**Supplementary Figure 24 |** The BET surface area plot for CNF-LIFM2 calculated from N2 adsorption data.


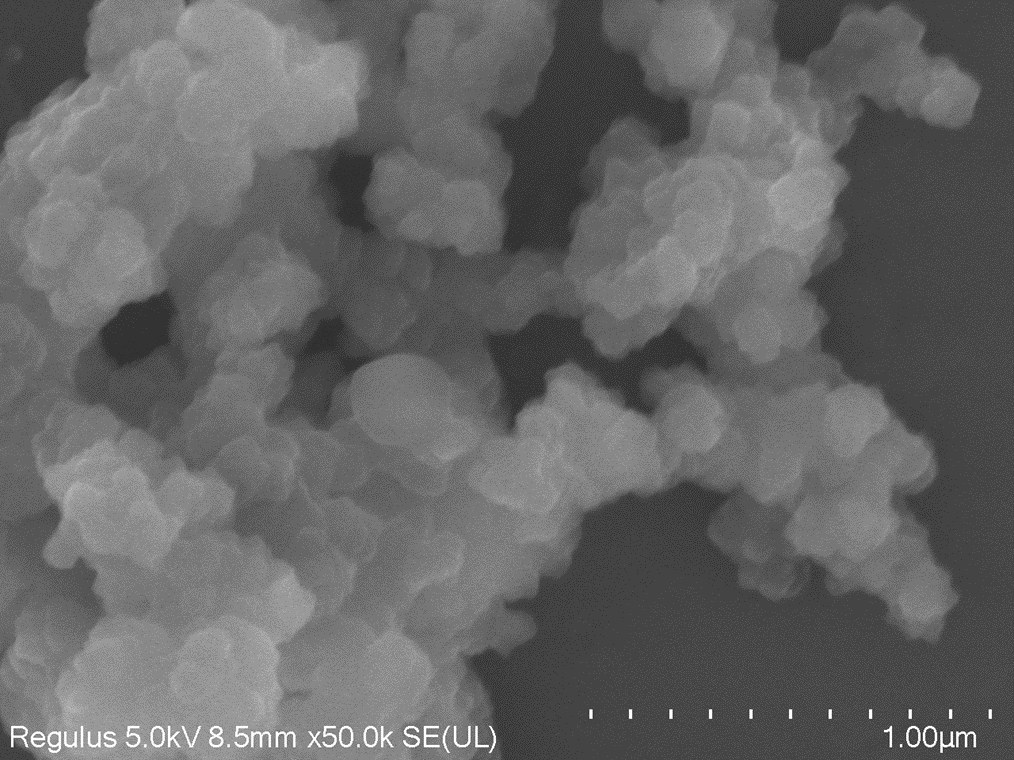


**Supplementary Figure 25 |** The SEM image of CNF-LIFM2.


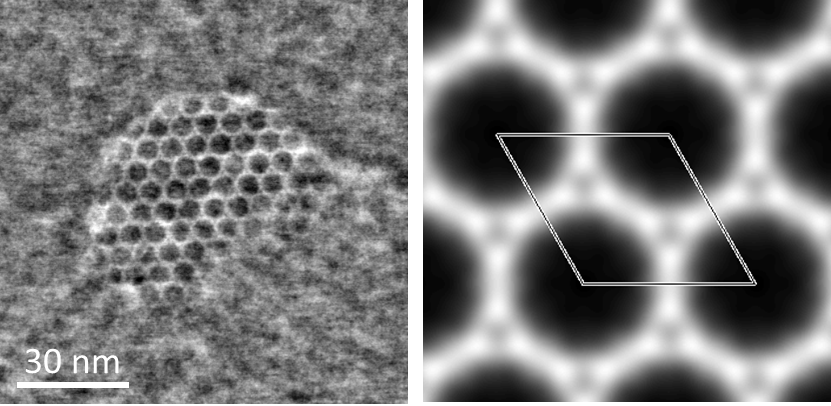


**Supplementary Figure 26 |** The iDPC-STEM image of CNF-LIFM2 along the [001] direction (left). The lattice averaged projected potential map with *p*3 plane group symmetry imposed (right).


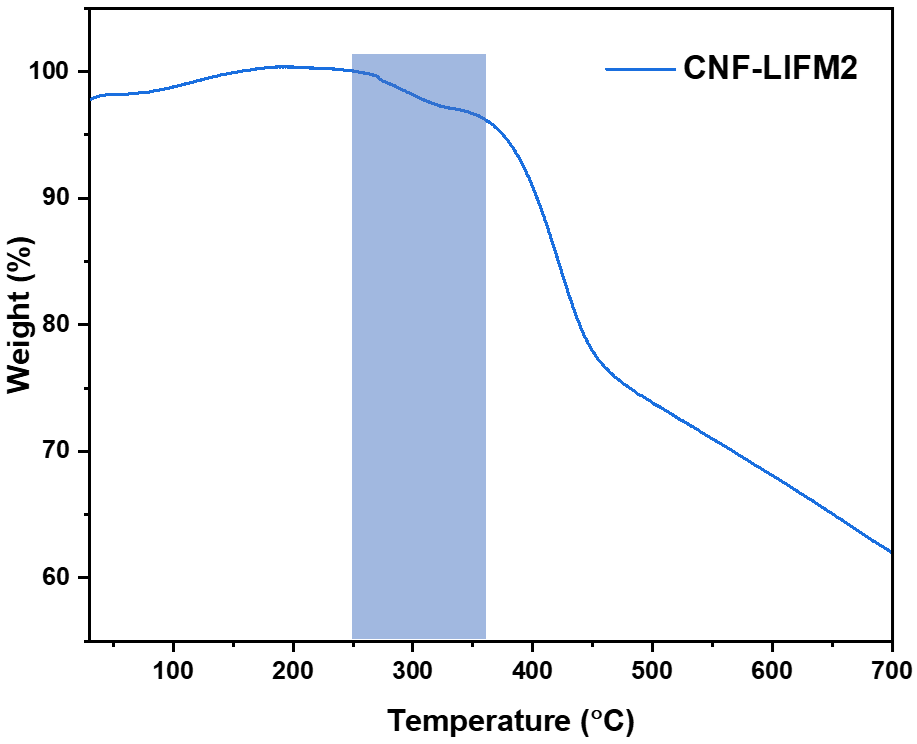


**Supplementary Figure 27 |** TheTGA curve of CNF-LIFM2 under N2 atmosphere. The weight loss between 250 °C and 360 °C is attributed to the decomposition of nitrate.


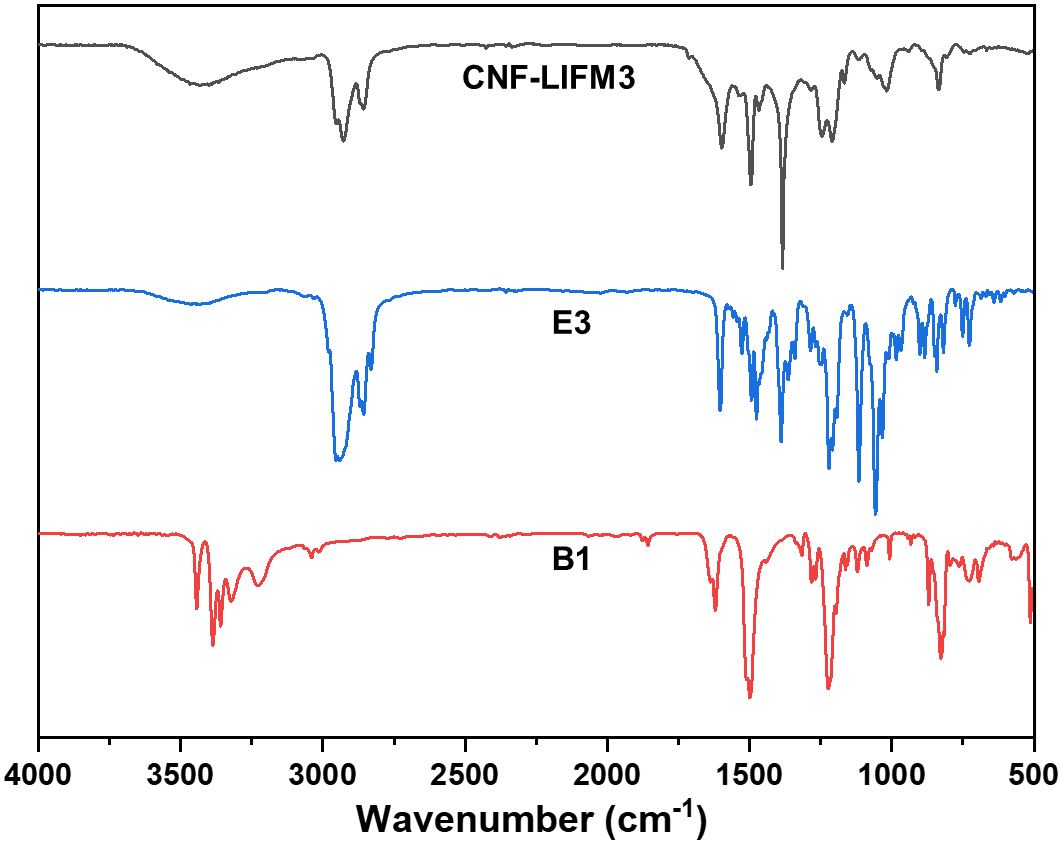


**Supplementary Figure 28 |** FT-IR spectra of CNF-LIFM3, building unit **E3**, and building unit **B1**.


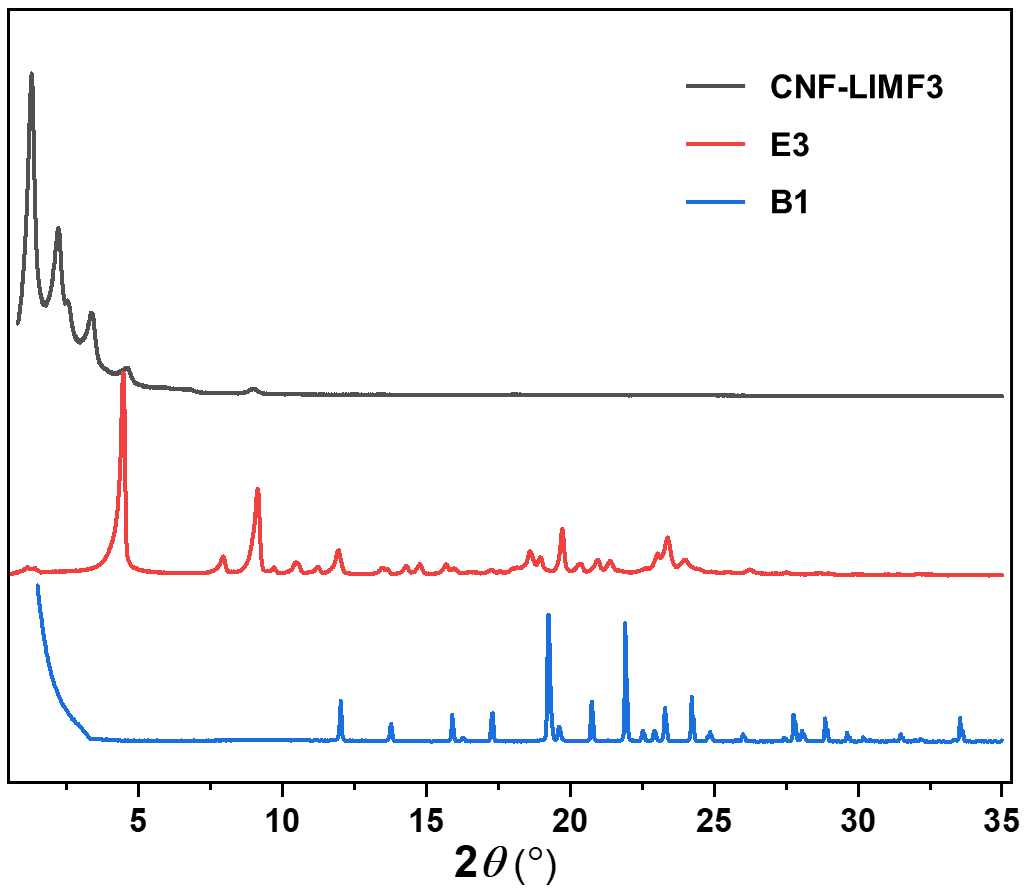


**Supplementary Figure 29 |** PXRD patterns of CNF-LIFM3, building unit **E3**, and building unit **B1**.


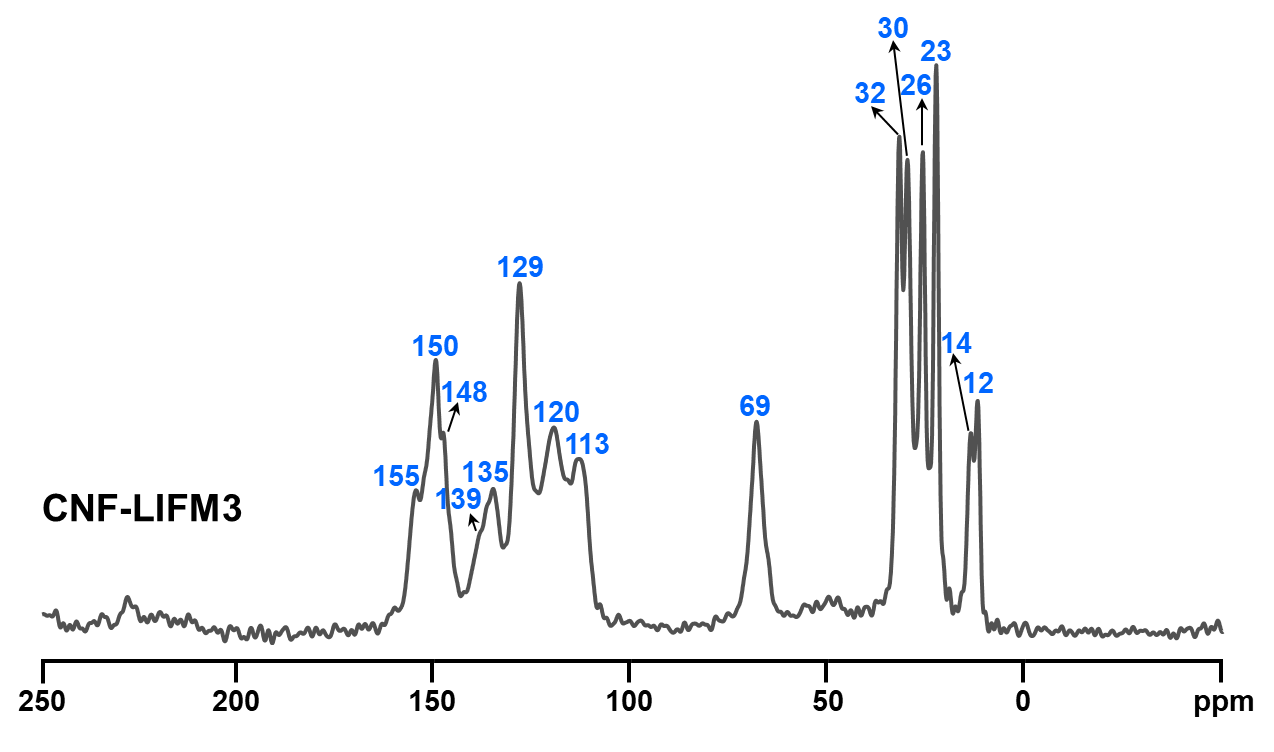


**Supplementary Figure 30 |** The13C CP/MAS NMR spectrum of CNF-LIFM3.


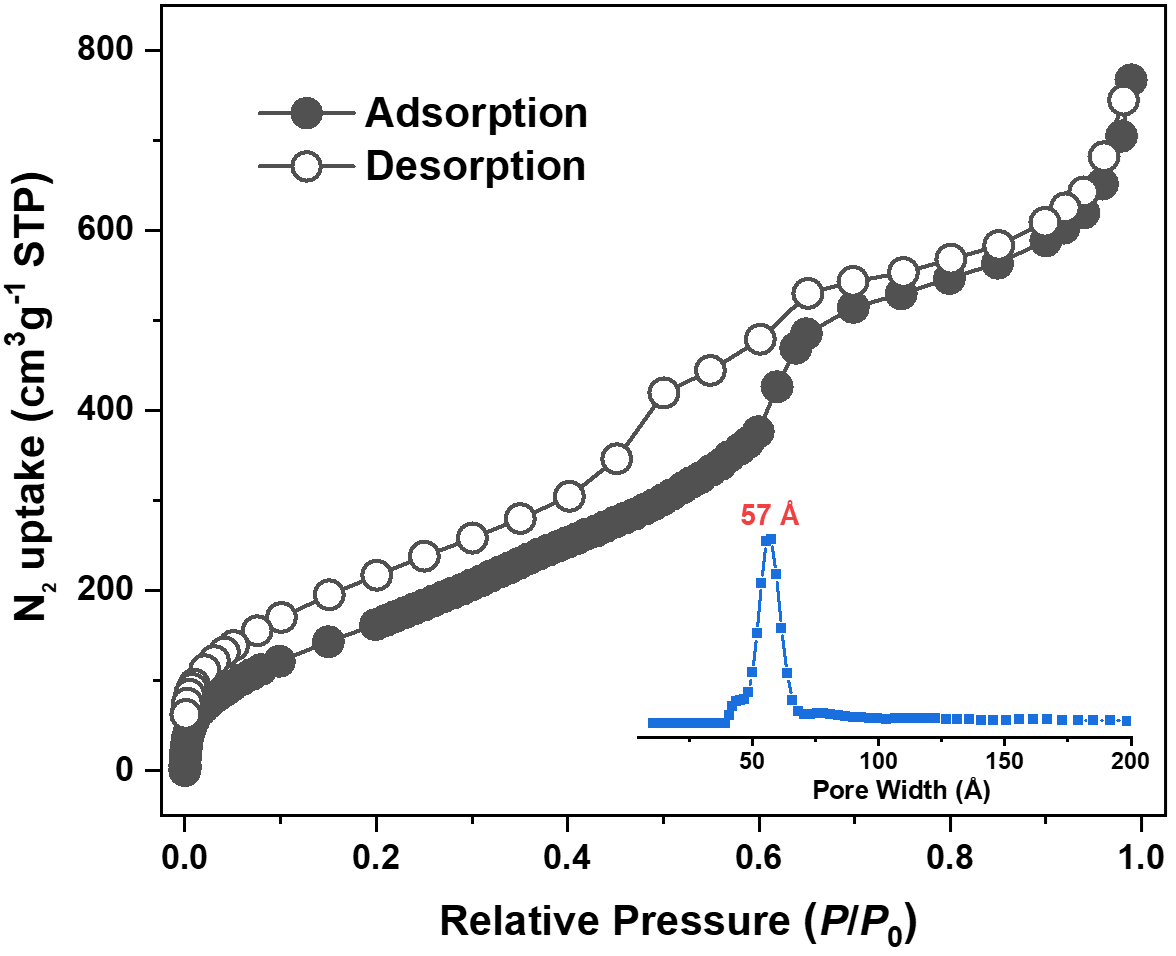


**Supplementary Figure 31 |** The N2 adsorption‒desorption isotherm line of CNF-LIFM3. Inset shows the pore size distribution of CNF-LIFM3 calculated by QSDFT.


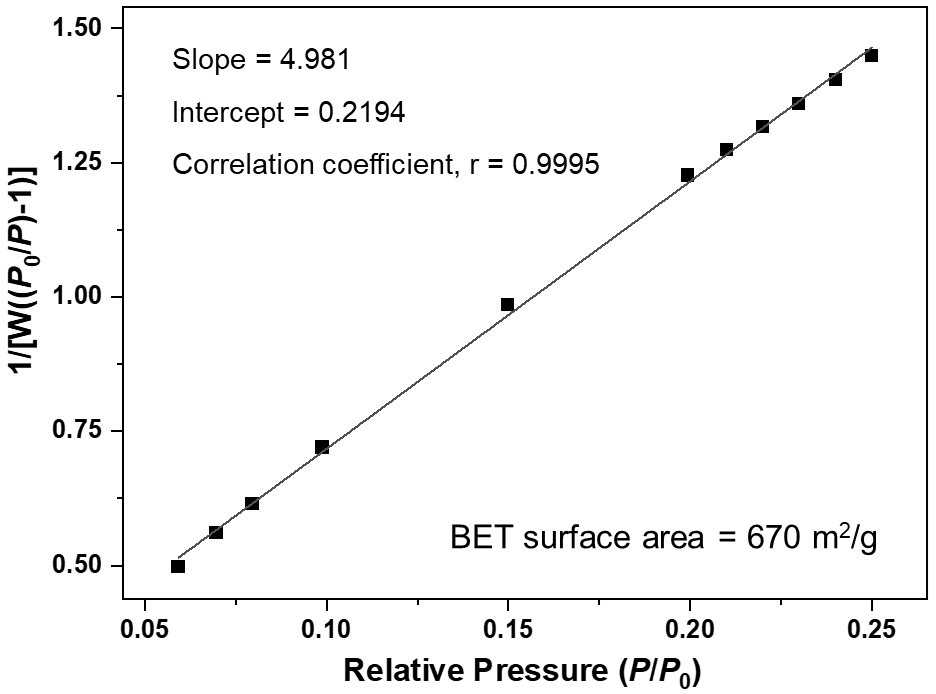


**Supplementary Figure 32 |** The BET surface area plot for CNF-LIFM3 calculated from N2 adsorption data.


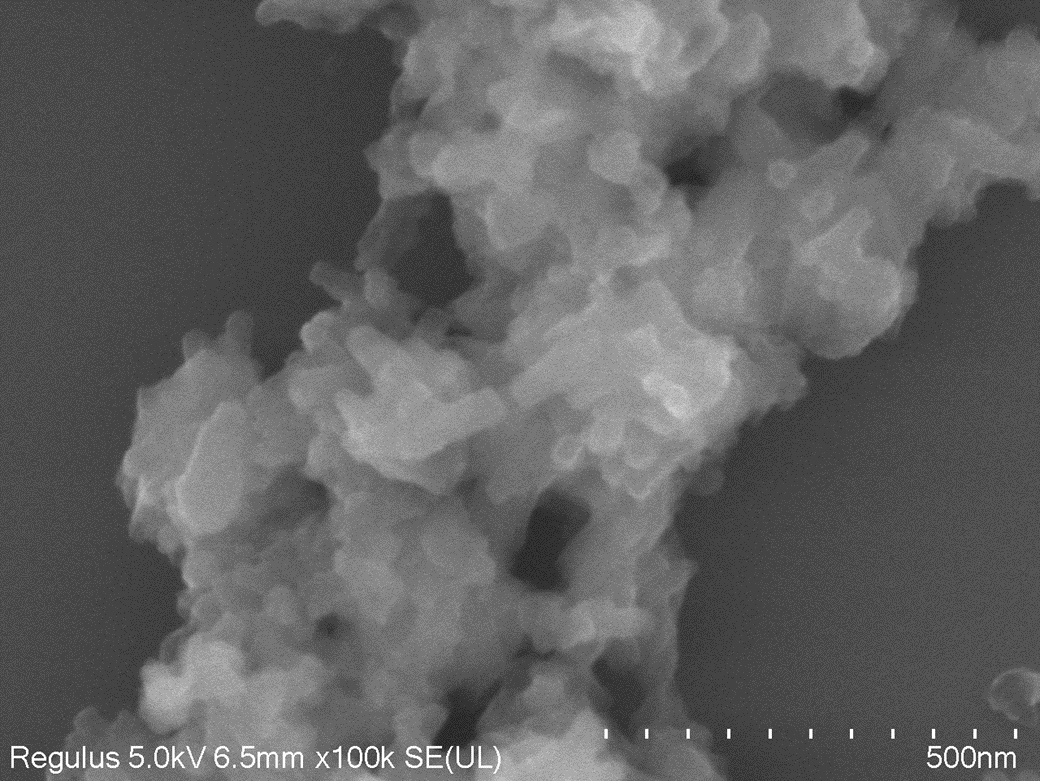


**Supplementary Figure 33 |** The SEM image of CNF-LIFM3.


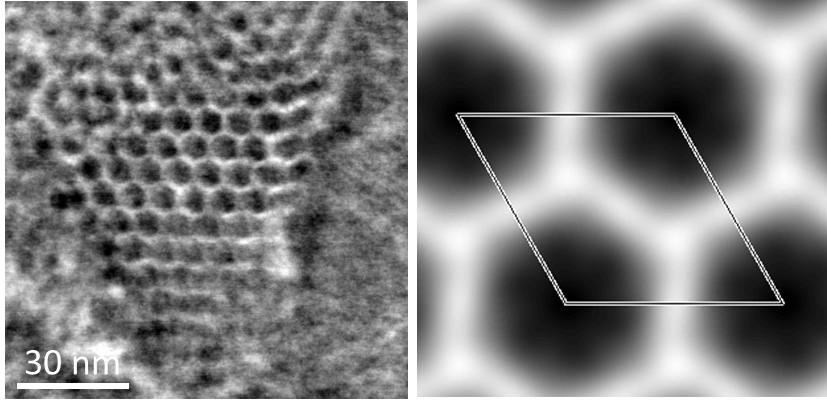


**Supplementary Figure 34 |** The iDPC-STEM image of CNF-LIFM3 along the [001] direction (left). The lattice averaged projected potential map with *p*3 plane group symmetry imposed (right).


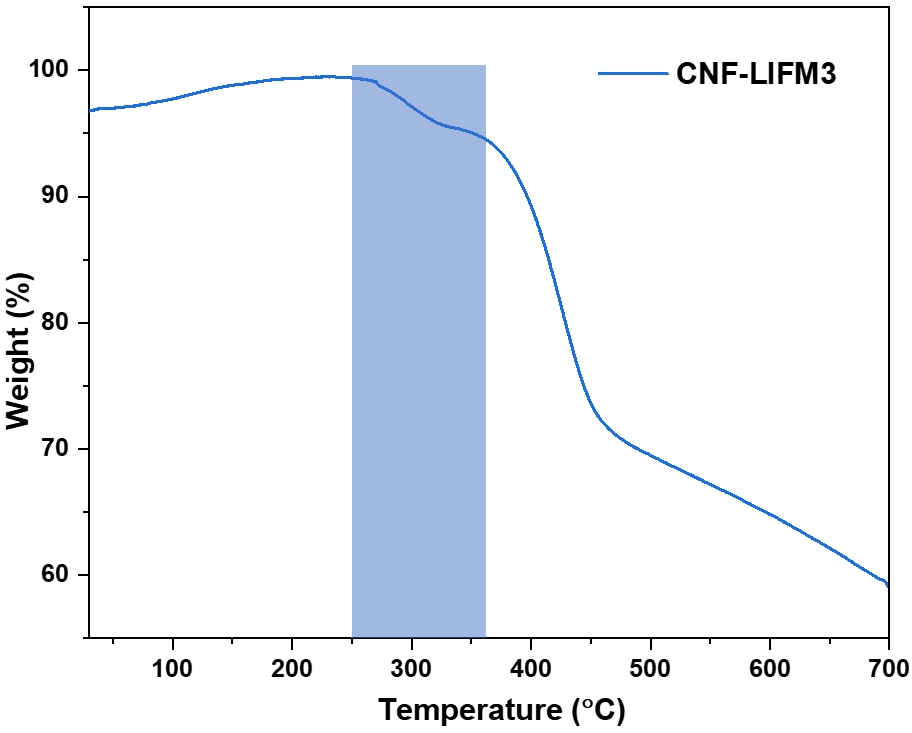


**Supplementary Figure 35 |** TheTGA curve of CNF-LIFM3 under N2 atmosphere. The weight loss between 250 °C and 360 °C is attributed to the decomposition of nitrate.


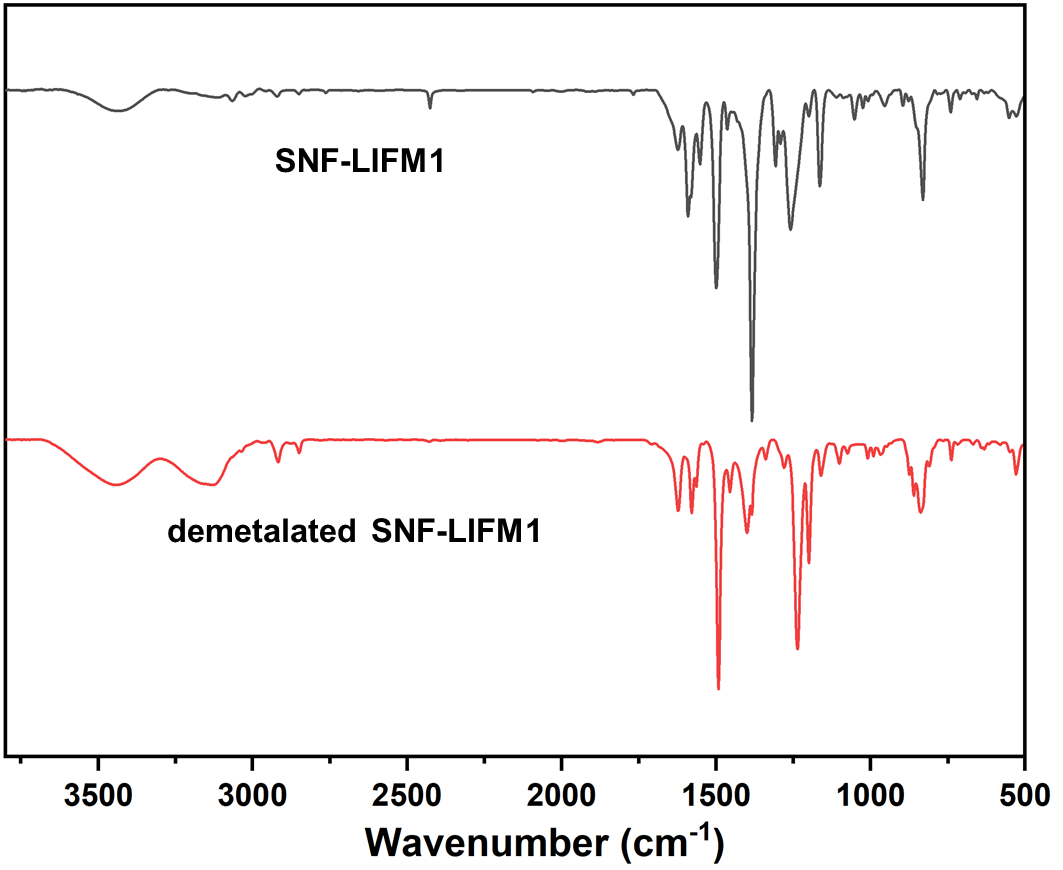


**Supplementary Figure 36 |** FT-IR spectra of original and demetalated SNF-LIFM1.

**
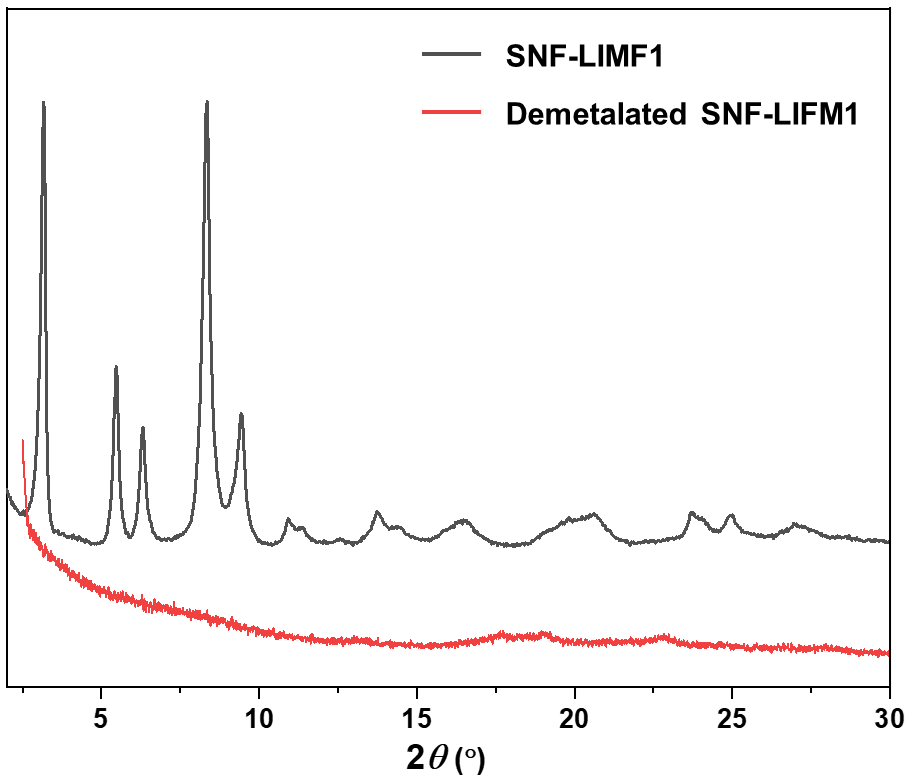
**

**Supplementary Figure 37 |** Thecomparison of experimental PXRD patterns of the original and demetalated SNF-LIFM1.


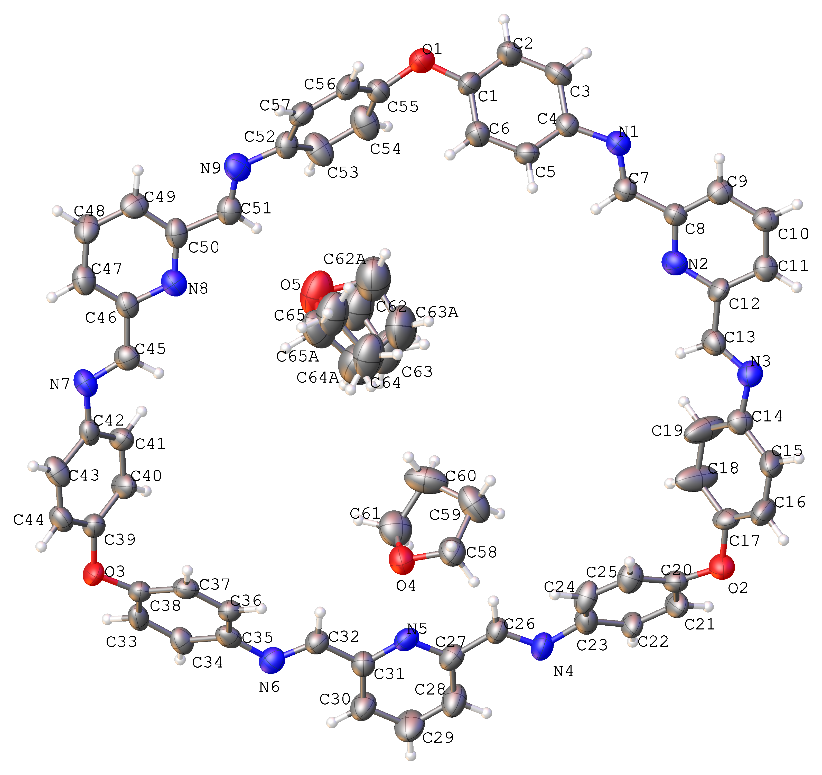


**Supplementary Figure 38 |** The single crystal structure of the macrocycle (demetalated SNF-LIFM1). Thermal ellipsoids are drawn at the 30% probability level. Metrical parameters can be obtained from the Cambridge Crystallographic Database Centre (CCDC 2282825).

**Supplementary Table 3.** Crystal data and structure refinement for the macrocycle (demetalated SNF-LIFM1).

| Empirical formula | C65H55N9O5 |
| --- | --- |
| Formula weight | 1042.18 |
| Temperature | 100 K |
| Wavelength | 1.54184 Å |
| Crystal system | monoclinic |
| Space group | *P*21/*c* |
| Unit cell dimensions | *a* = 13.0338(7) Å *α* = 90°  *b* = 40.125(2) Å *β* = 95.650(5)°  *c* = 10.3901(6) Å *γ* = 90° |
| Volume | 5407.4(5) Å3 |
| Z | 4 |
| Density (calculated) | 1.280 g/cm3 |
| Reflections collected | 26005 |
| Independent reflections | 8091 [*R*int = 0.0961] |
| Data/restraints/parameters | 8091/265/757 |
| Goodness-of-fit on F2 | 1.167 |
| Final *R* indices [I>2sigma(I)] | *R*1 = 0.1126, *wR*2 = 0.3181 |
| *R* indices (all data) | *R*1 = 0.2060, *wR*2 = 0.3772 |


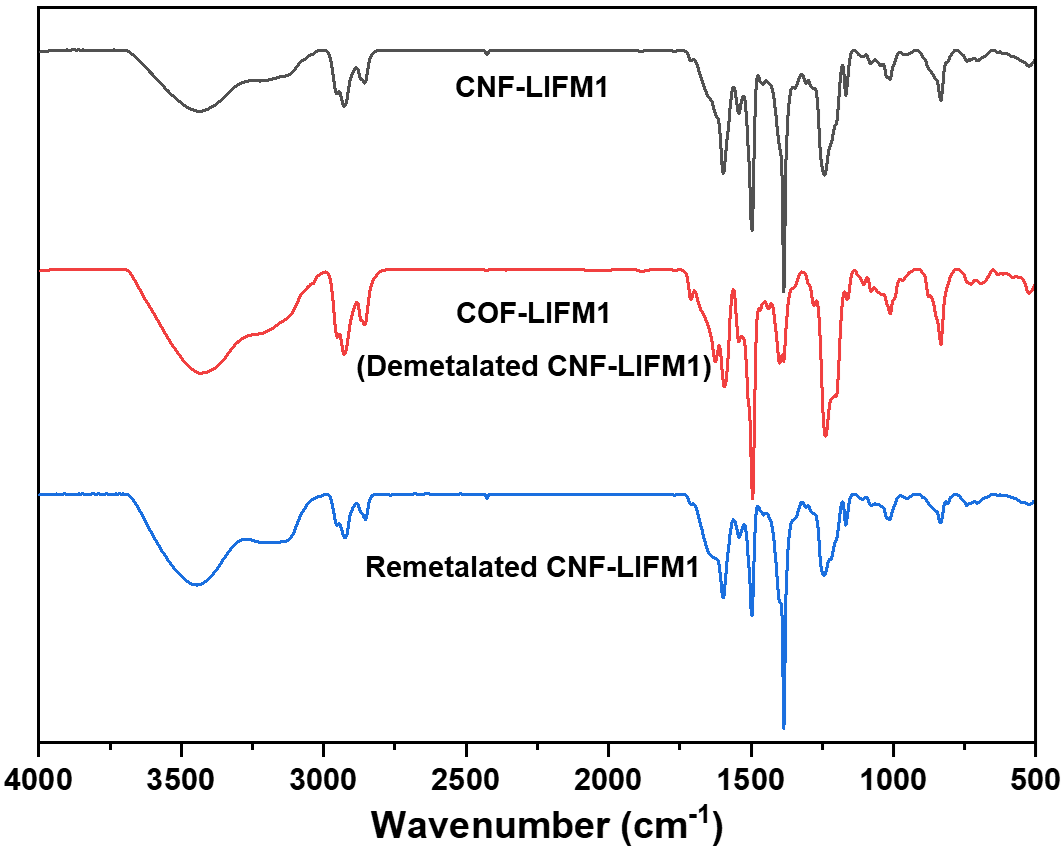


**Supplementary Figure 39 |** FT-IR spectra of the original CNF-LIFM1, COF-LIFM1(demetalated CNF-LIFM1), and remetalated CNF-LIFM1.


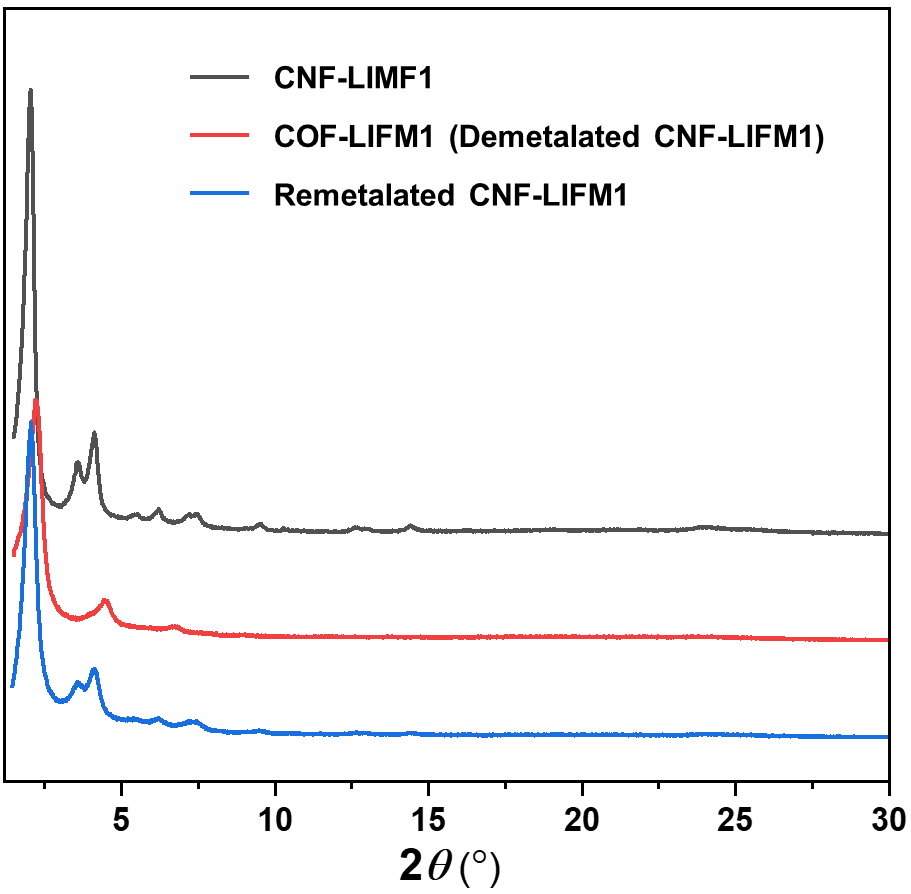


**Supplementary Figure 40 |** Thecomparison of experimental PXRD patterns of the original CNF-LIFM1, COF-LIFM1 (demetalated CNF-LIFM1), and remetalated CNF-LIFM1.

**
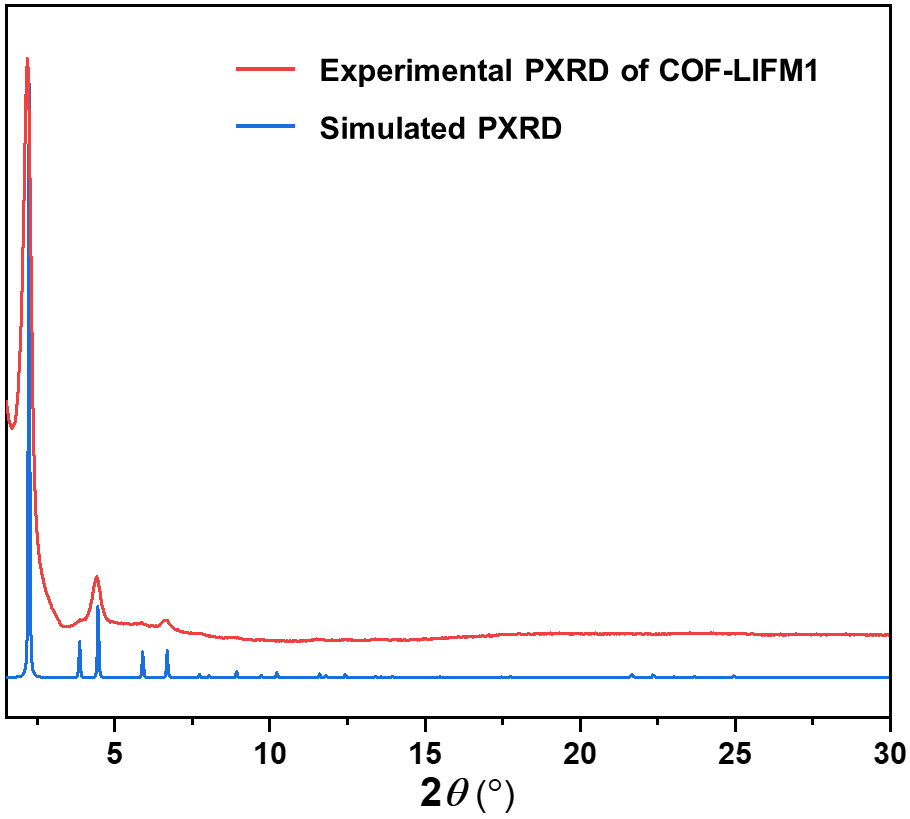
**

**Supplementary Figure 41 |** The experimental and simulated PXRD patterns of the COF-LIFM1.

**
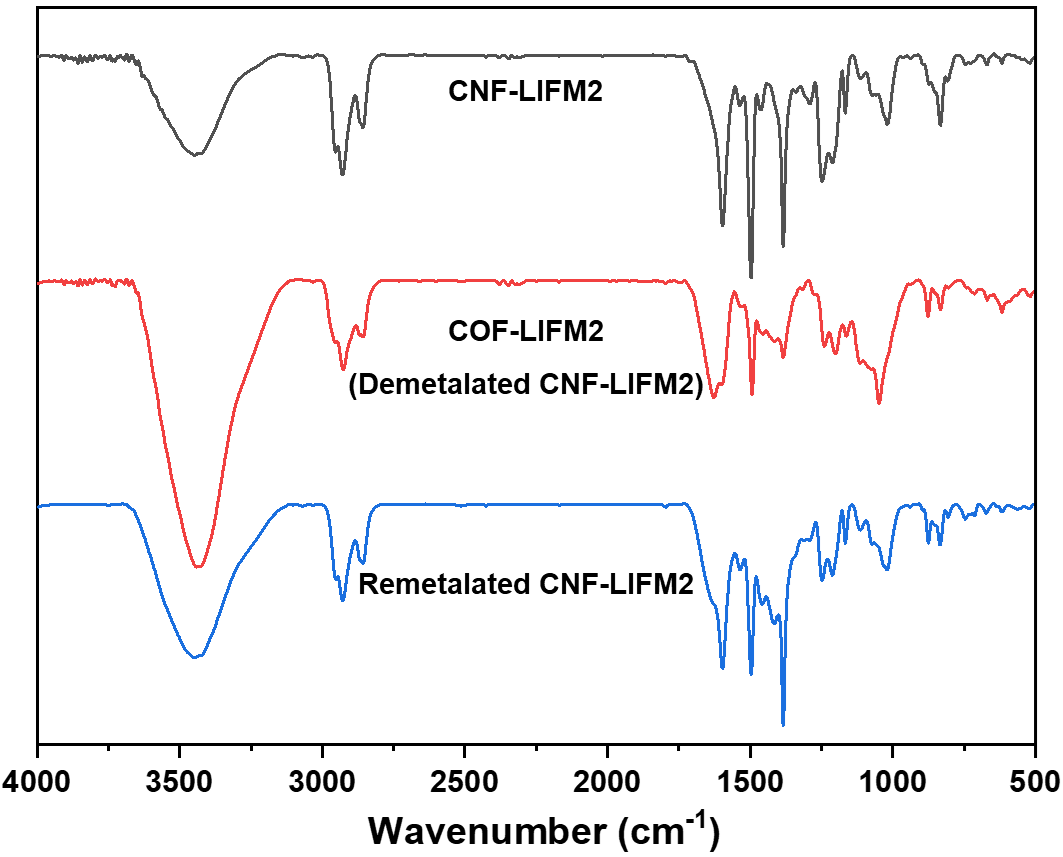
**

**Supplementary Figure 42 |** FT-IR spectra of the original CNF-LIFM2, COF-LIFM2 (demetalated CNF-LIFM2), and remetalated CNF-LIFM2.


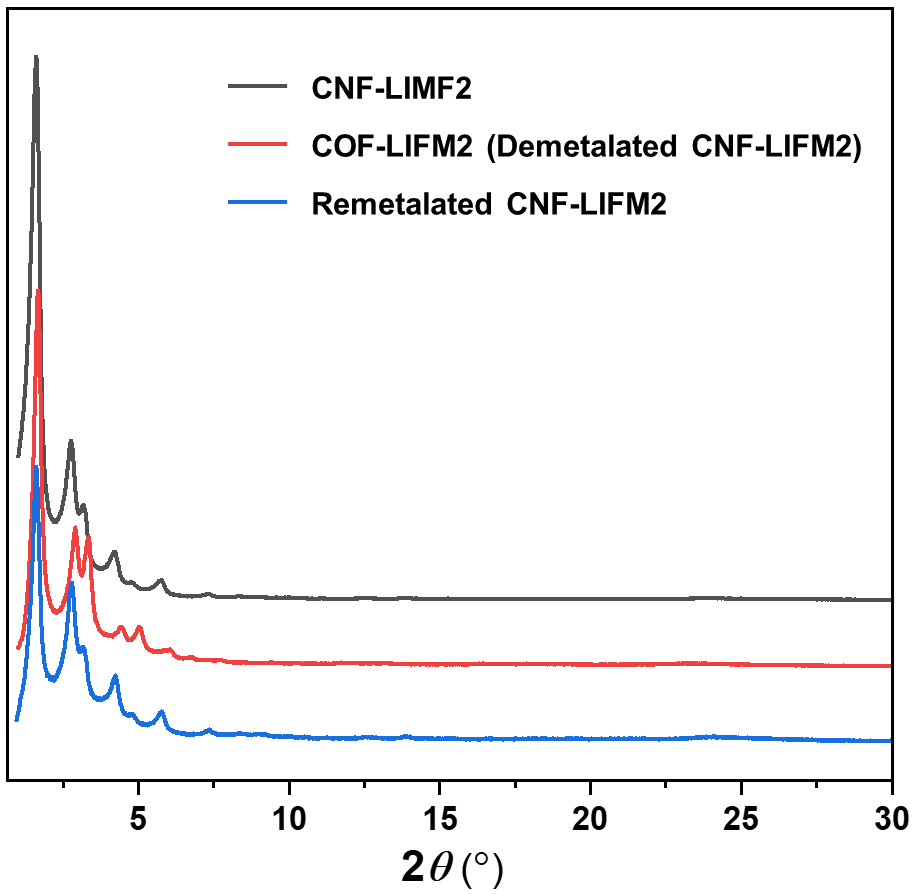


**Supplementary Figure 43 |** Thecomparison of experimental PXRD patterns of the original CNF-LIFM2, COF-LIFM2(demetalated CNF-LIFM2), and remetalated CNF-LIFM2.


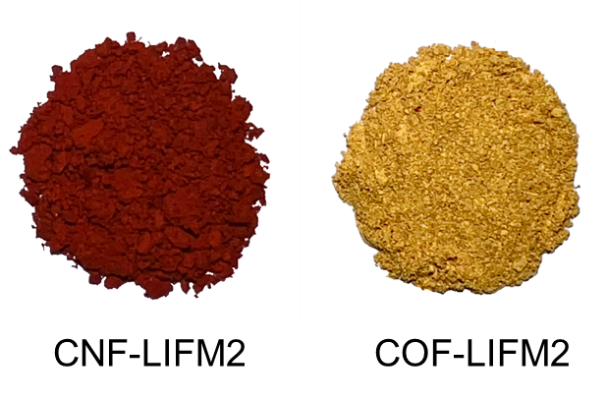


**Supplementary Figure 44 |** The comparison of colors of CNF-LIFM2 and COF-LIFM2 (demetalated CNF-LIFM2).


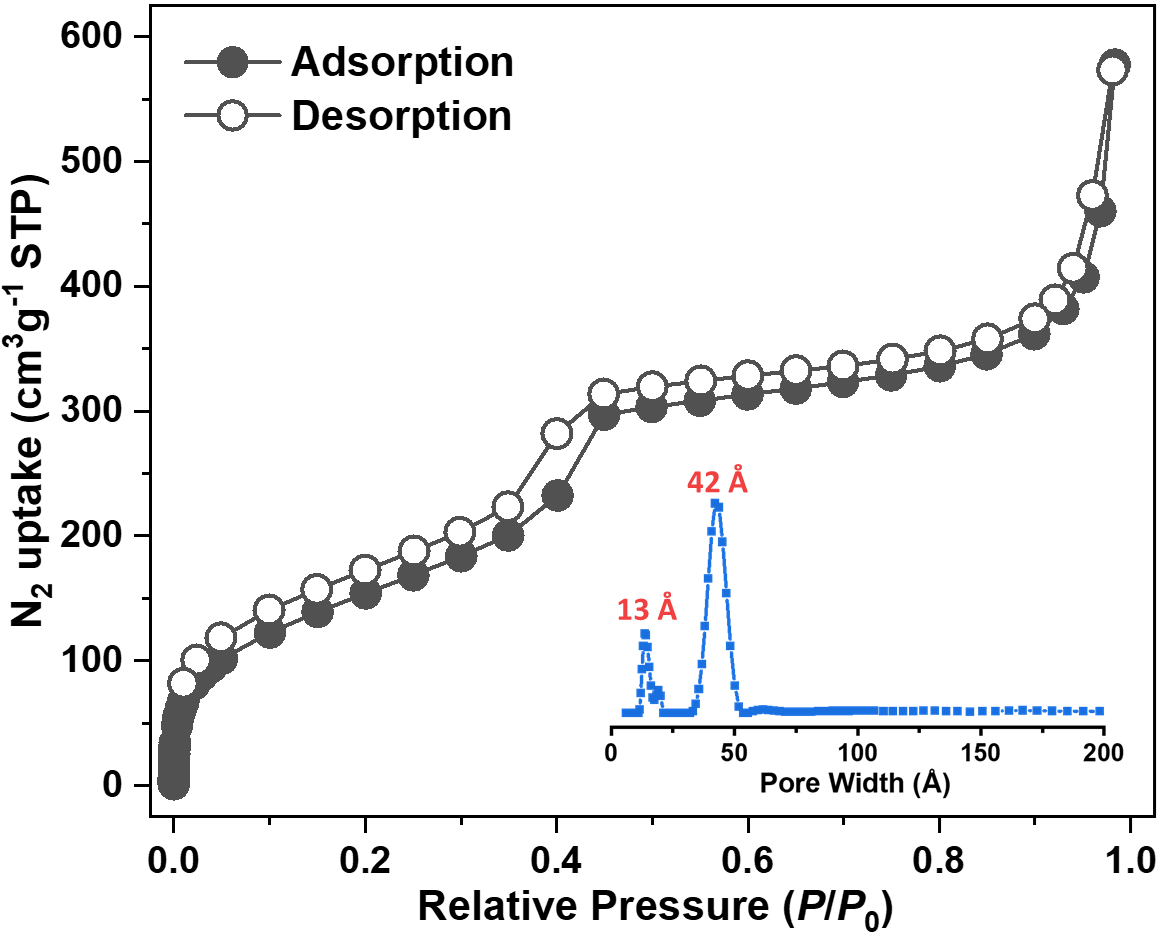


**Supplementary Figure 45 |** The N2 adsorption‒desorption isotherm line of COF-LIFM2 (demetalated CNF-LIFM2). Inset shows the pore size distribution of COF-LIFM2 calculated by QSDFT.


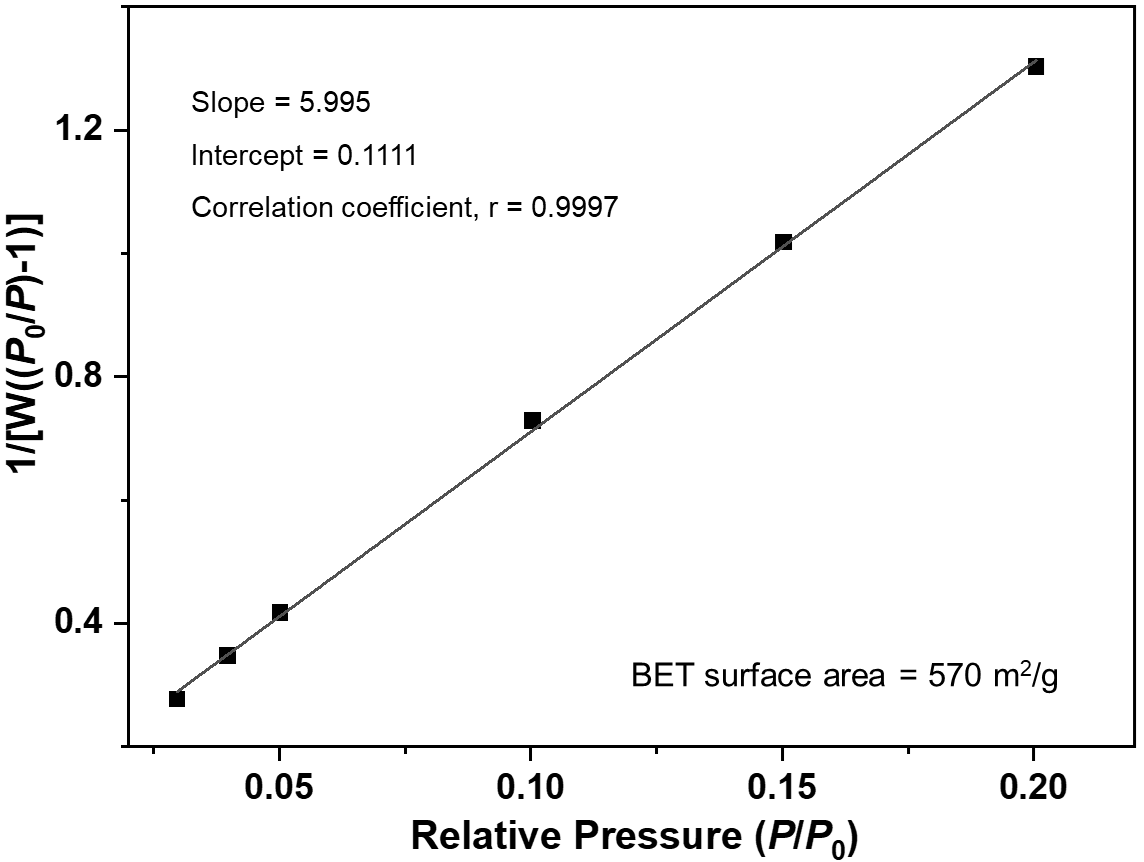


**Supplementary Figure 46 |** The BET surface area plot for COF-LIFM2 calculated from N2 adsorption data.

**
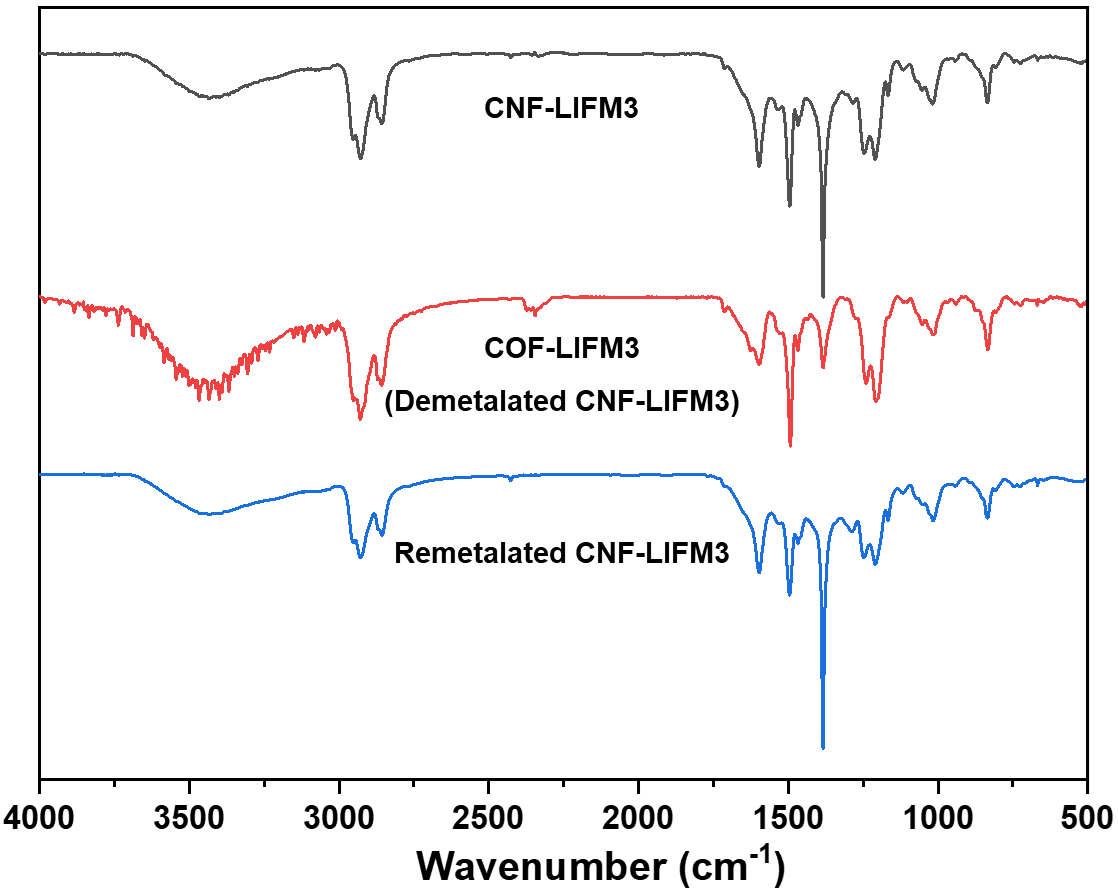
**

**Supplementary Figure 47 |** FT-IR spectra of the original CNF-LIFM3, COF-LIFM3(demetalated CNF-LIFM3), and remetalated CNF-LIFM3.

**
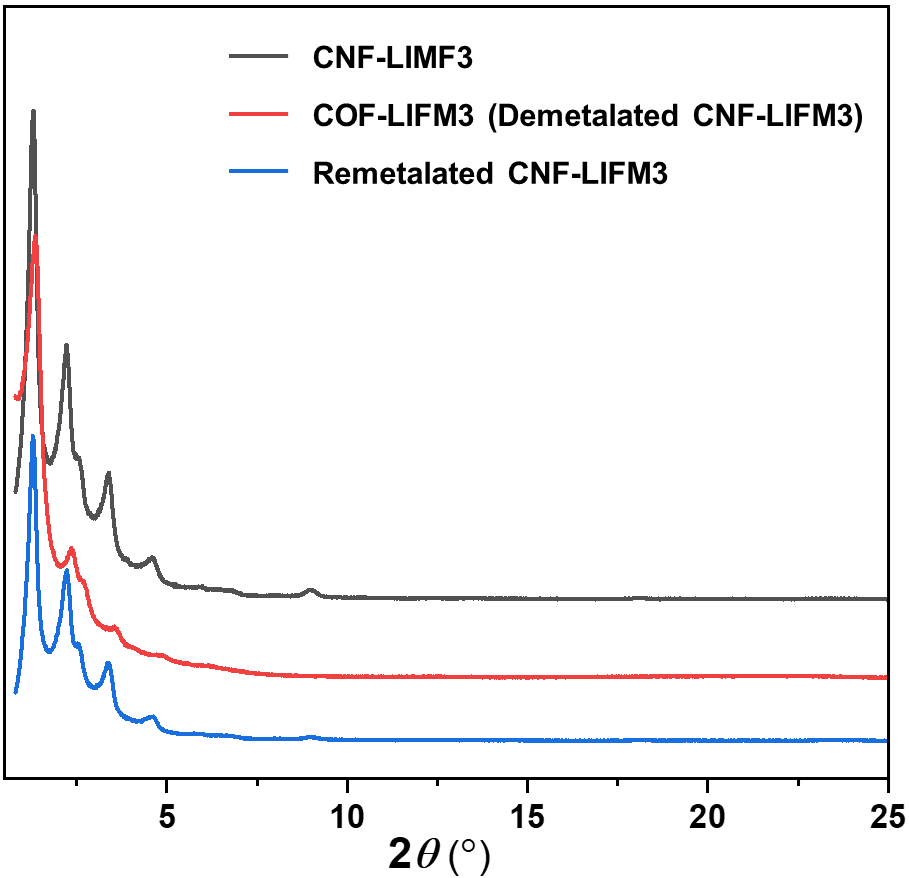
**

**Supplementary Figure 48 |** Thecomparison of experimental PXRD patterns of the original CNF-LIFM3, COF-LIFM3 (demetalated CNF-LIFM3), and remetalated CNF-LIFM3.

**
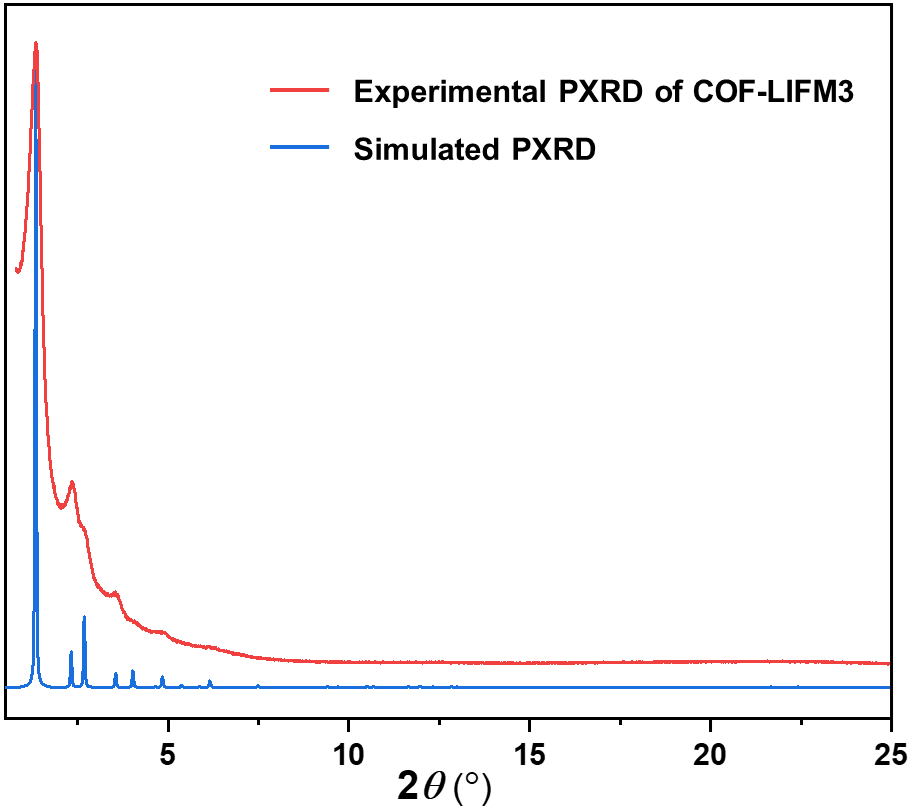
**

**Supplementary Figure 49 |** The experimental and simulated PXRD patterns of COF-LIFM3.

**Supplementary Table 4.** ICP-MS results of the fresh and demetalated materials.

|  | Zn content | | |
| --- | --- | --- | --- |
|  | Calculated | Fresh material | Demetalated material |
| SNF-LIFM1  (C19H13N5O7Zn)n | 13.38% | 12.46% | 0.53% |
| CNF-LIFM1  (C28H26N5O8Zn)n | 10.45% | 10.06% | 0.44% |
| CNF-LIFM2  (C40H42N5O9Zn)n | 8.15% | 7.92% | 0.25% |
| CNF-LIFM1  (C52H58N5O10Zn)n | 6.68% | 6.21% | 0.29% |

**
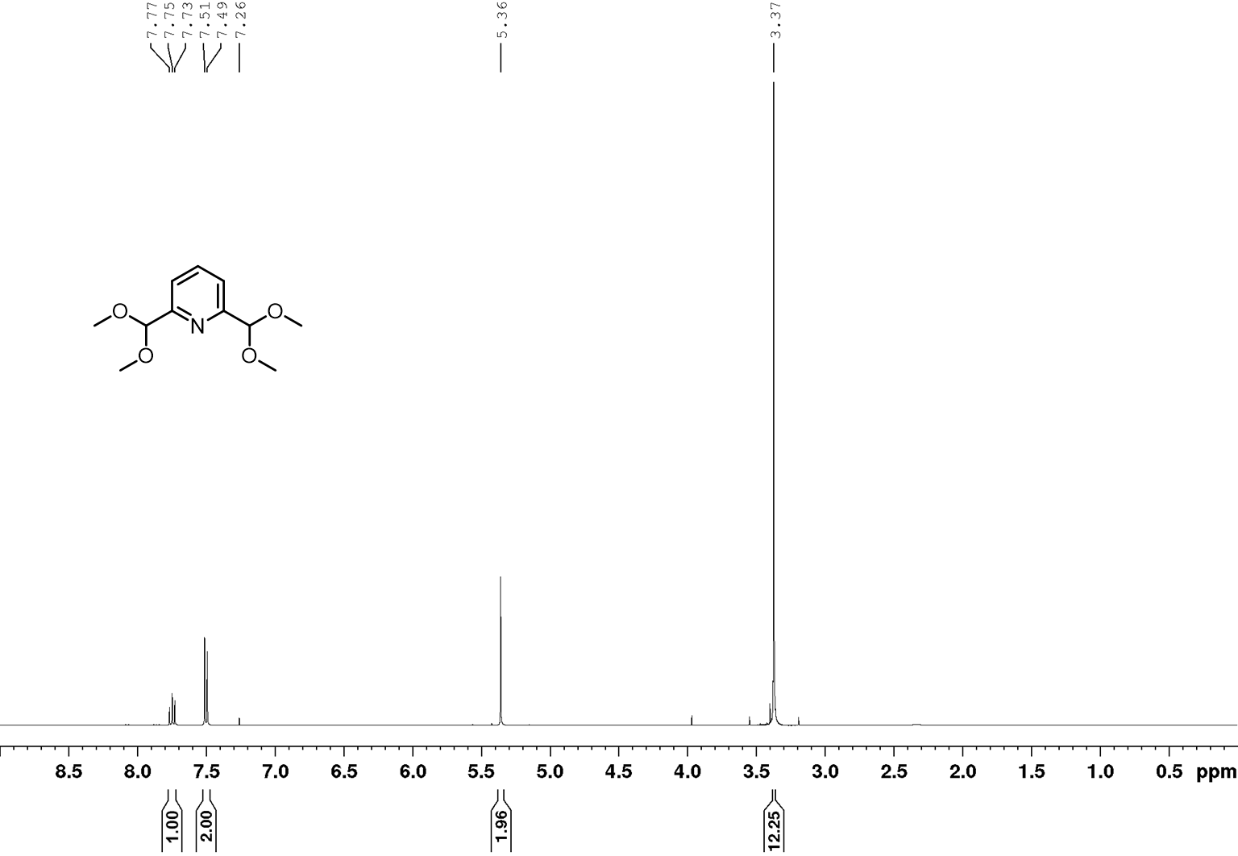
**

**Supplementary Figure 50 |** 1H NMR spectrum of building unit **A1** (400 MHz, CDCl3).

**
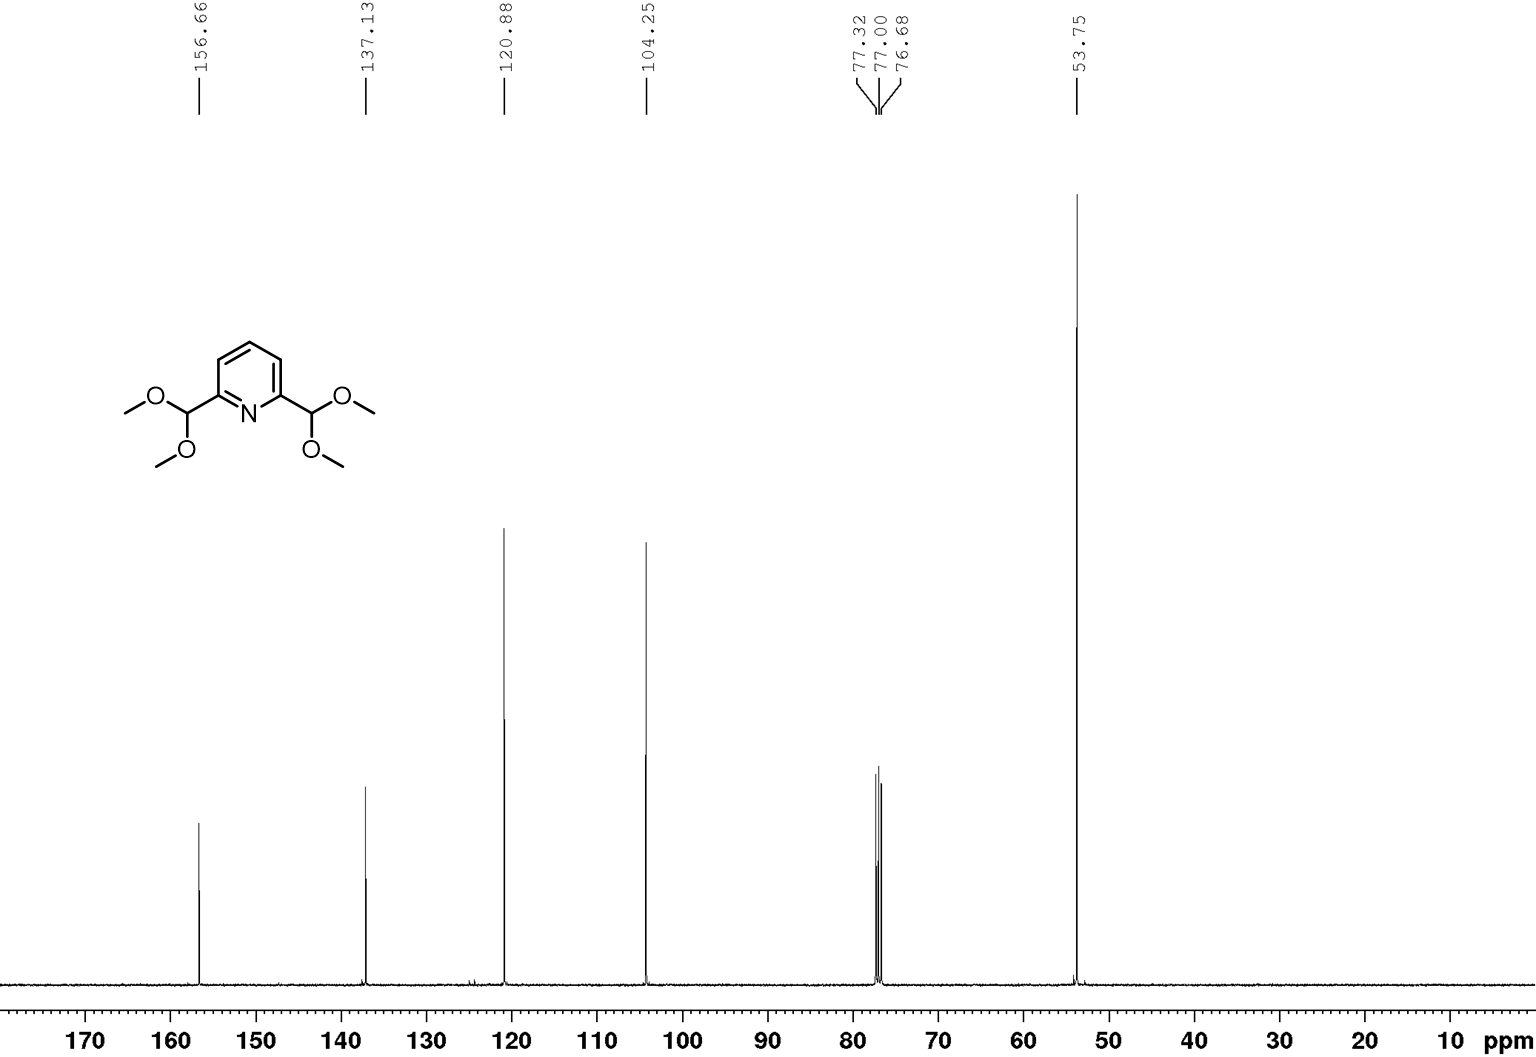
**

**Supplementary Figure 51 |** 13C NMR spectrum of building unit **A1** (100 MHz, CDCl3).


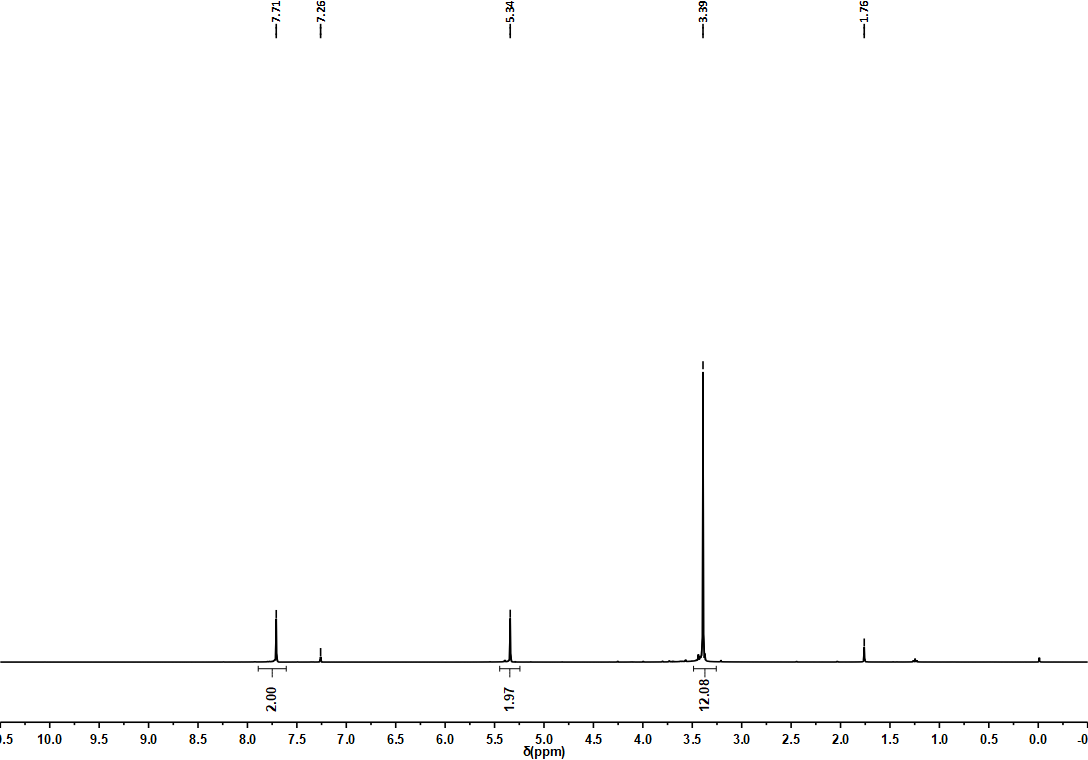


**Supplementary Figure 52 |** 1H NMR spectrum of compound **S2** (400 MHz, CDCl3).


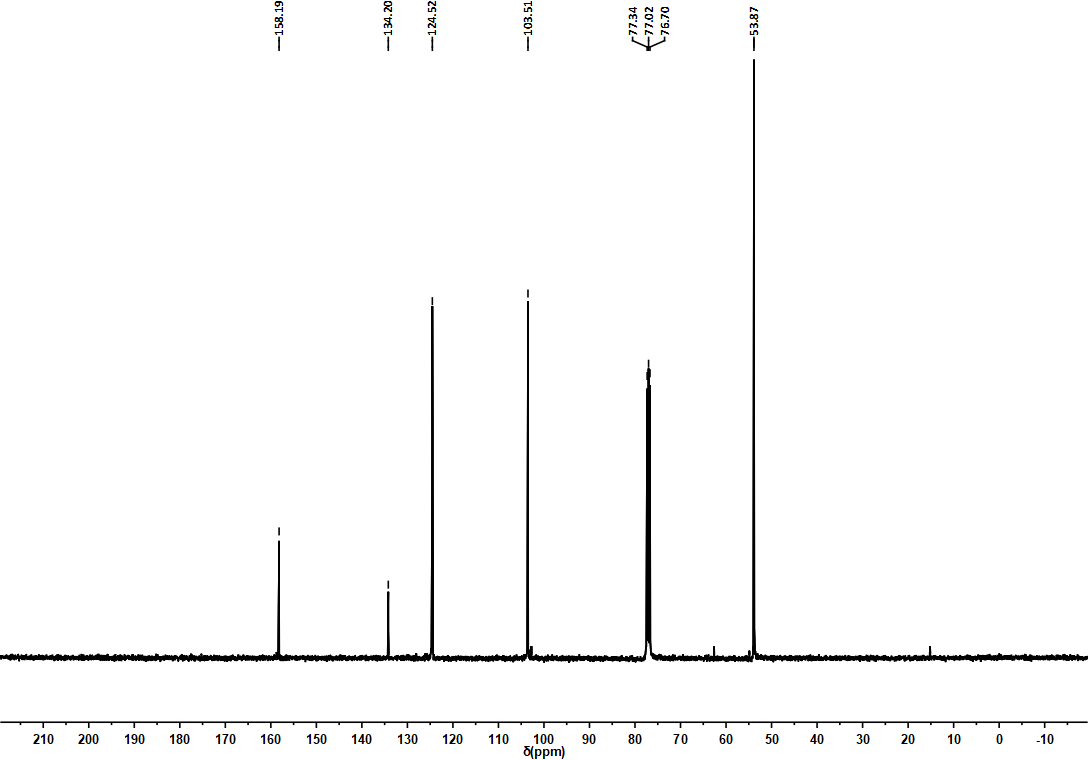


**Supplementary Figure 53 |** 13C NMR spectrum of **S2** (100 MHz, CDCl3).


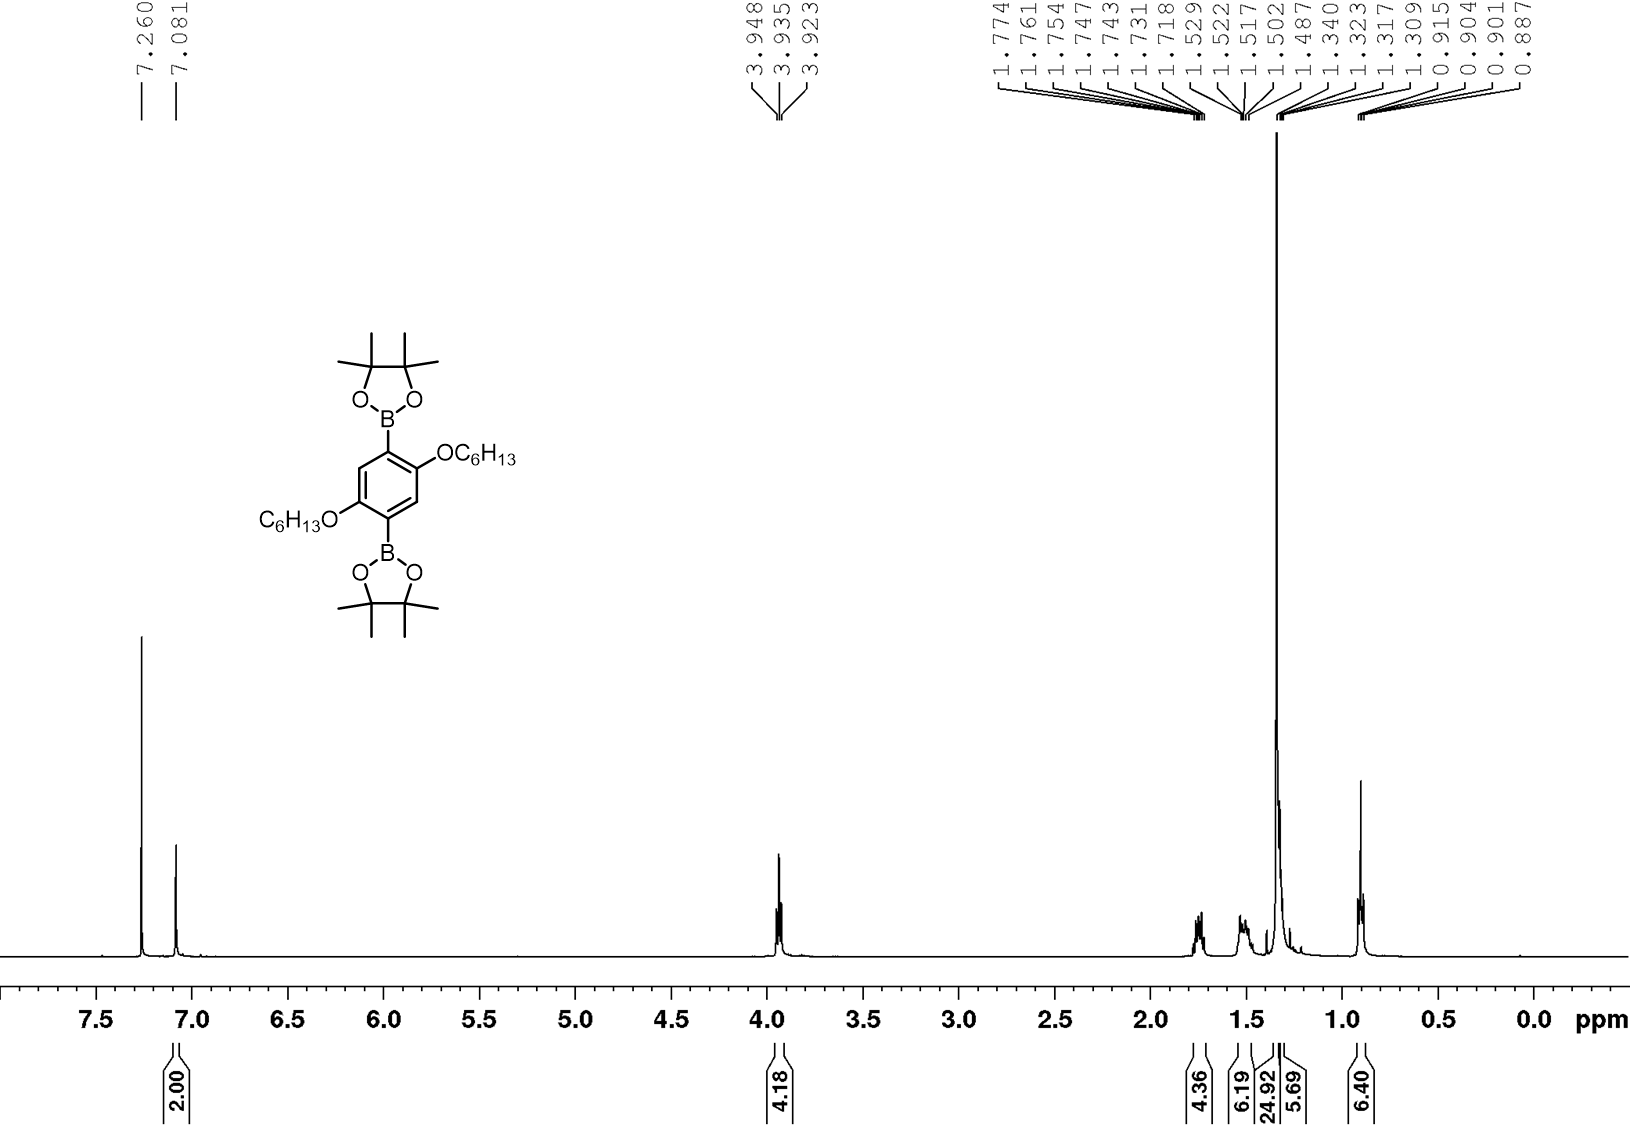


**Supplementary Figure 54 |** 1H NMR spectrum of compound **S4** (500 MHz, CDCl3).


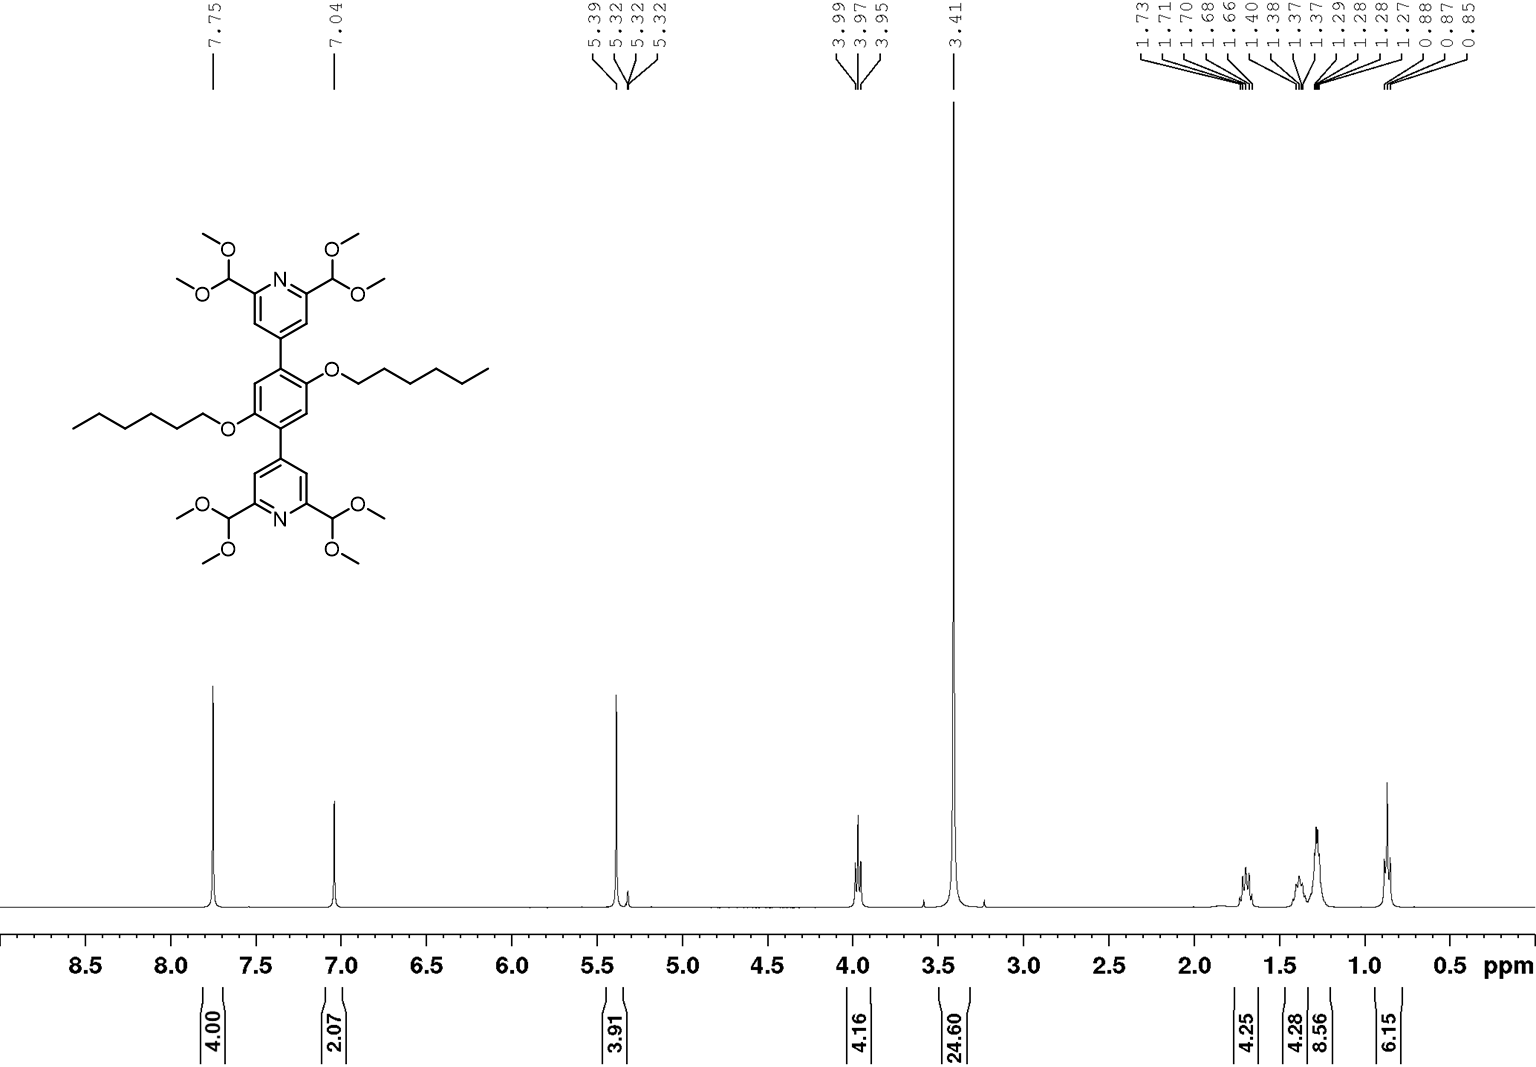


**Supplementary Figure 55 |** 1H NMR spectrum of building unit **E1** (400 MHz, CD2Cl2).


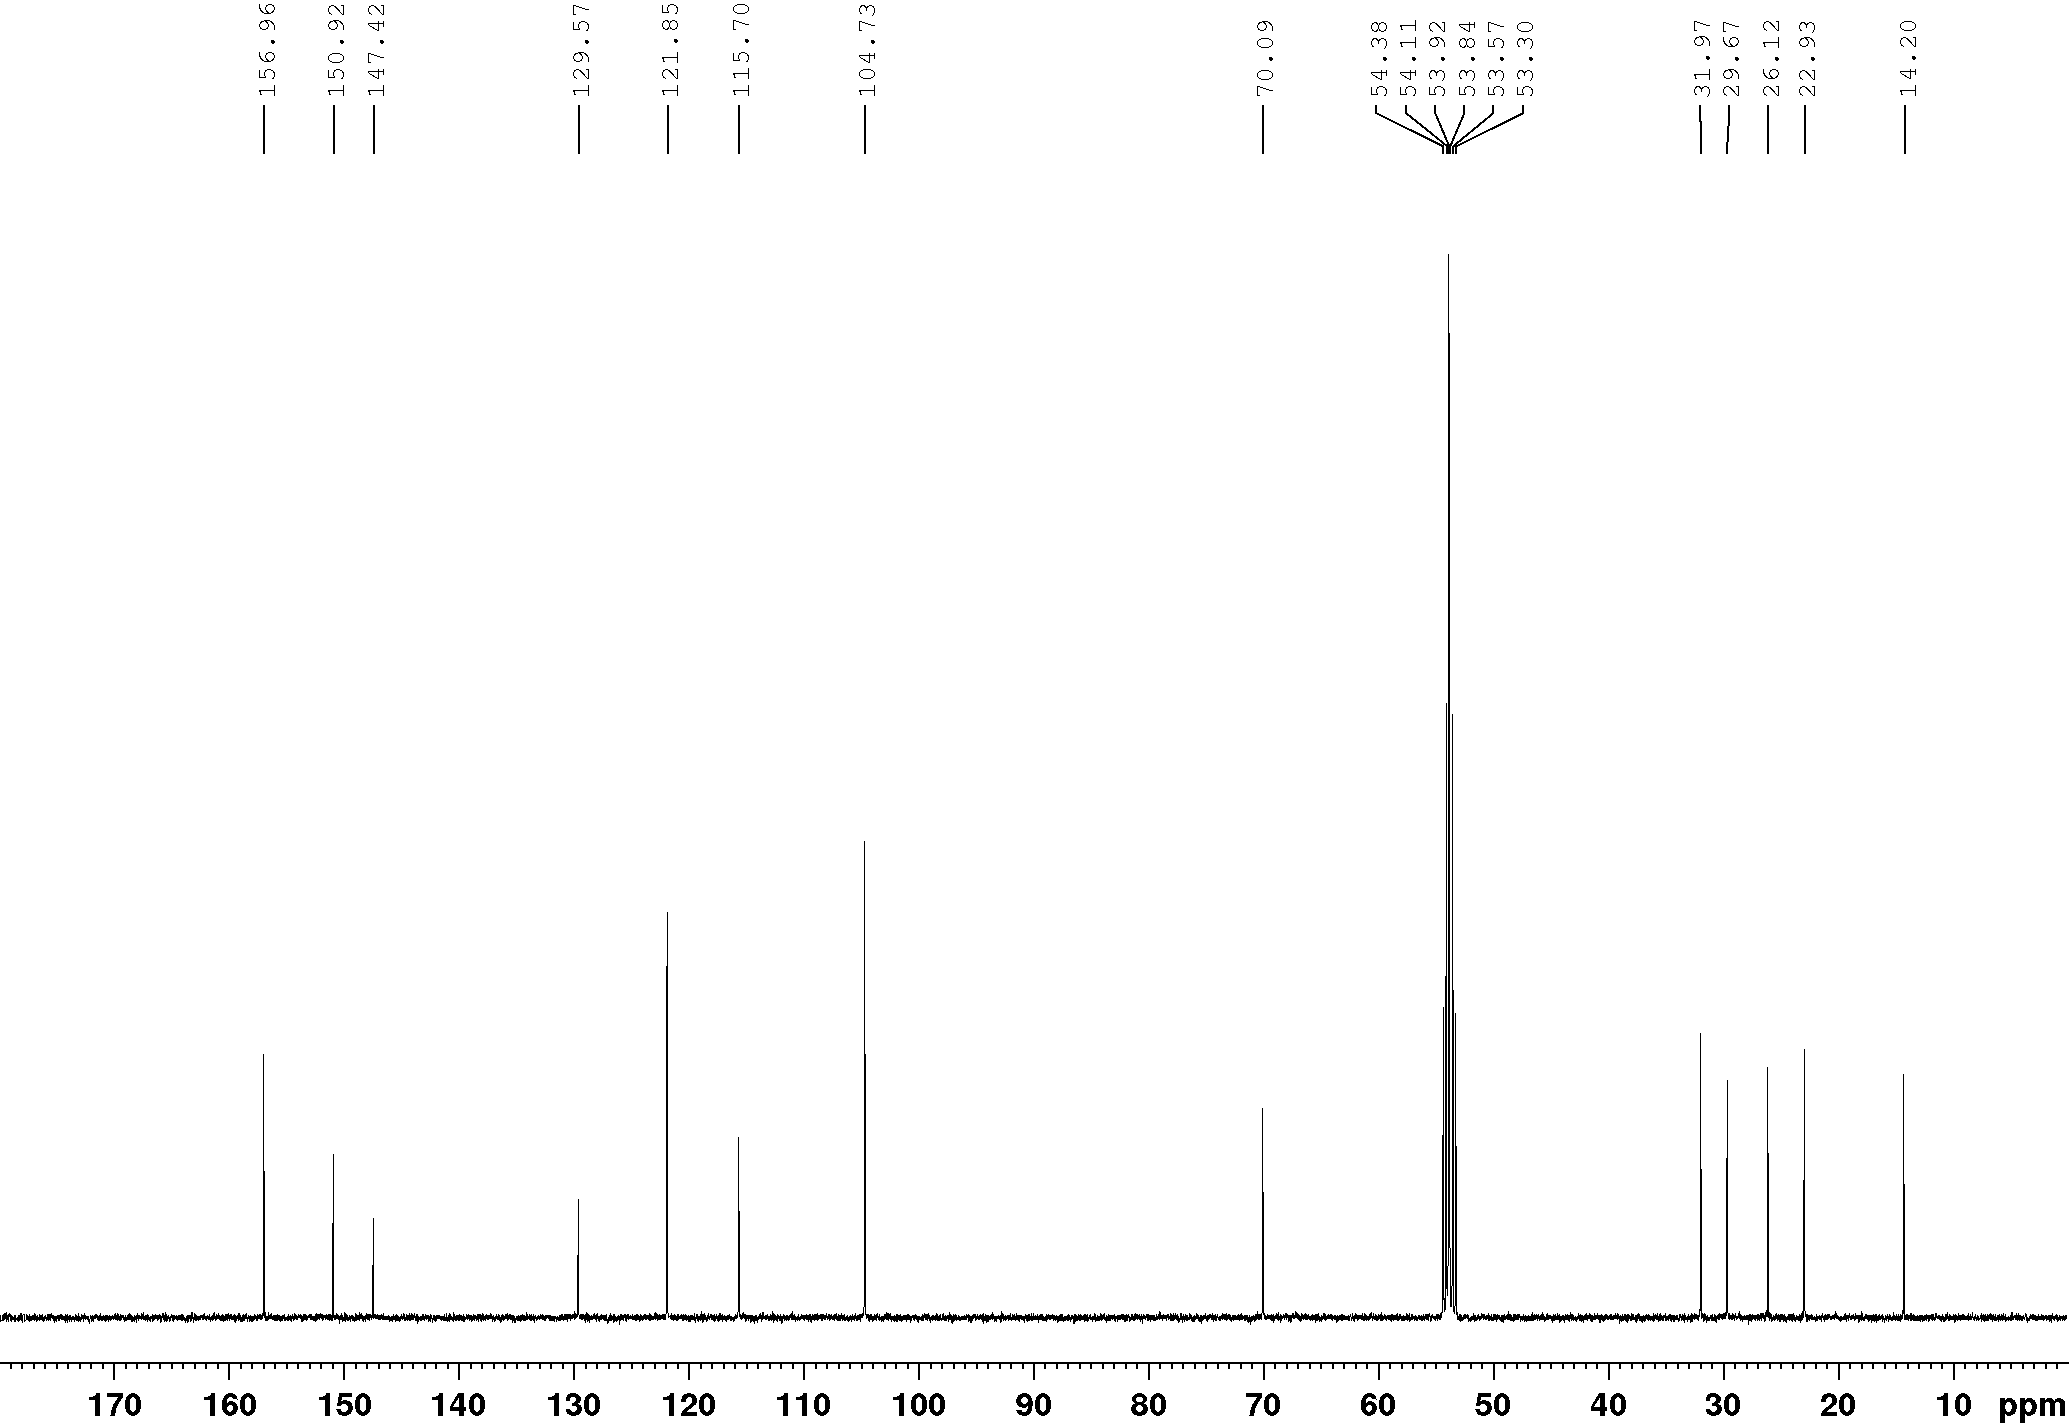


**Supplementary Figure 56 |** 13C NMR spectrum of building unit **E1** (100 MHz, CD2Cl2).


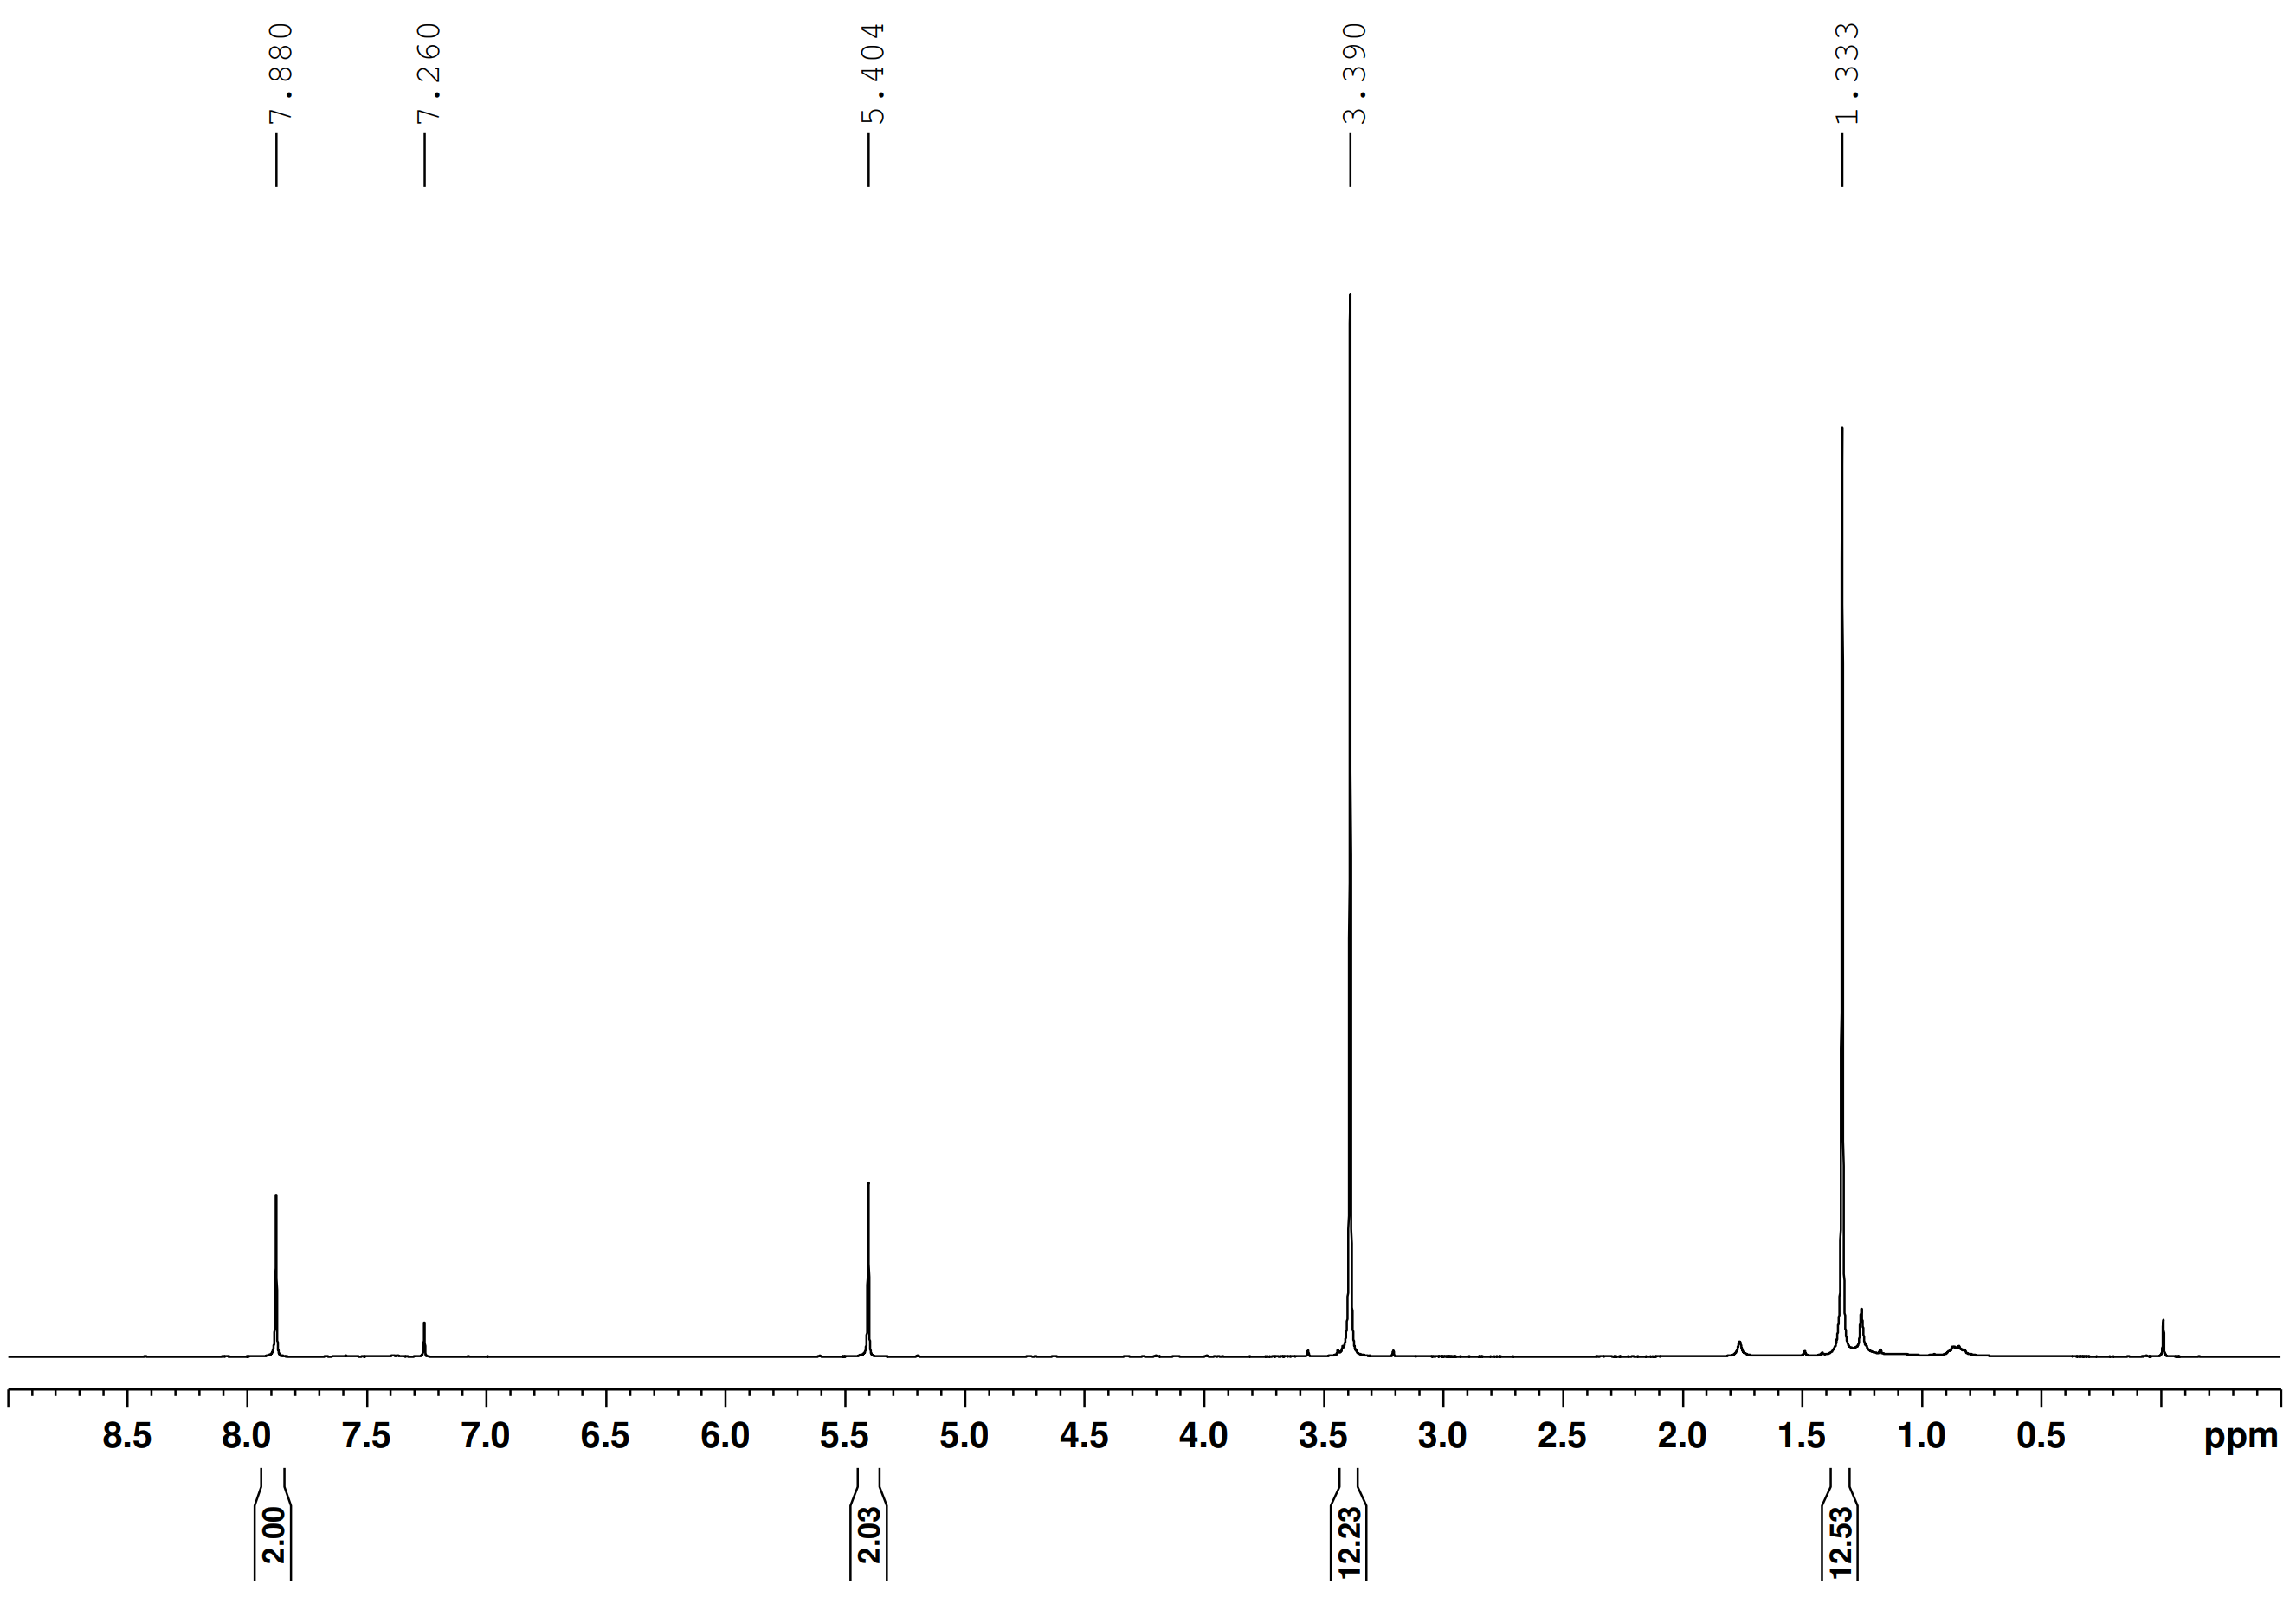


**Supplementary Figure 57 |** 1H NMR spectrum of compound **S5** (400 MHz, CDCl3).


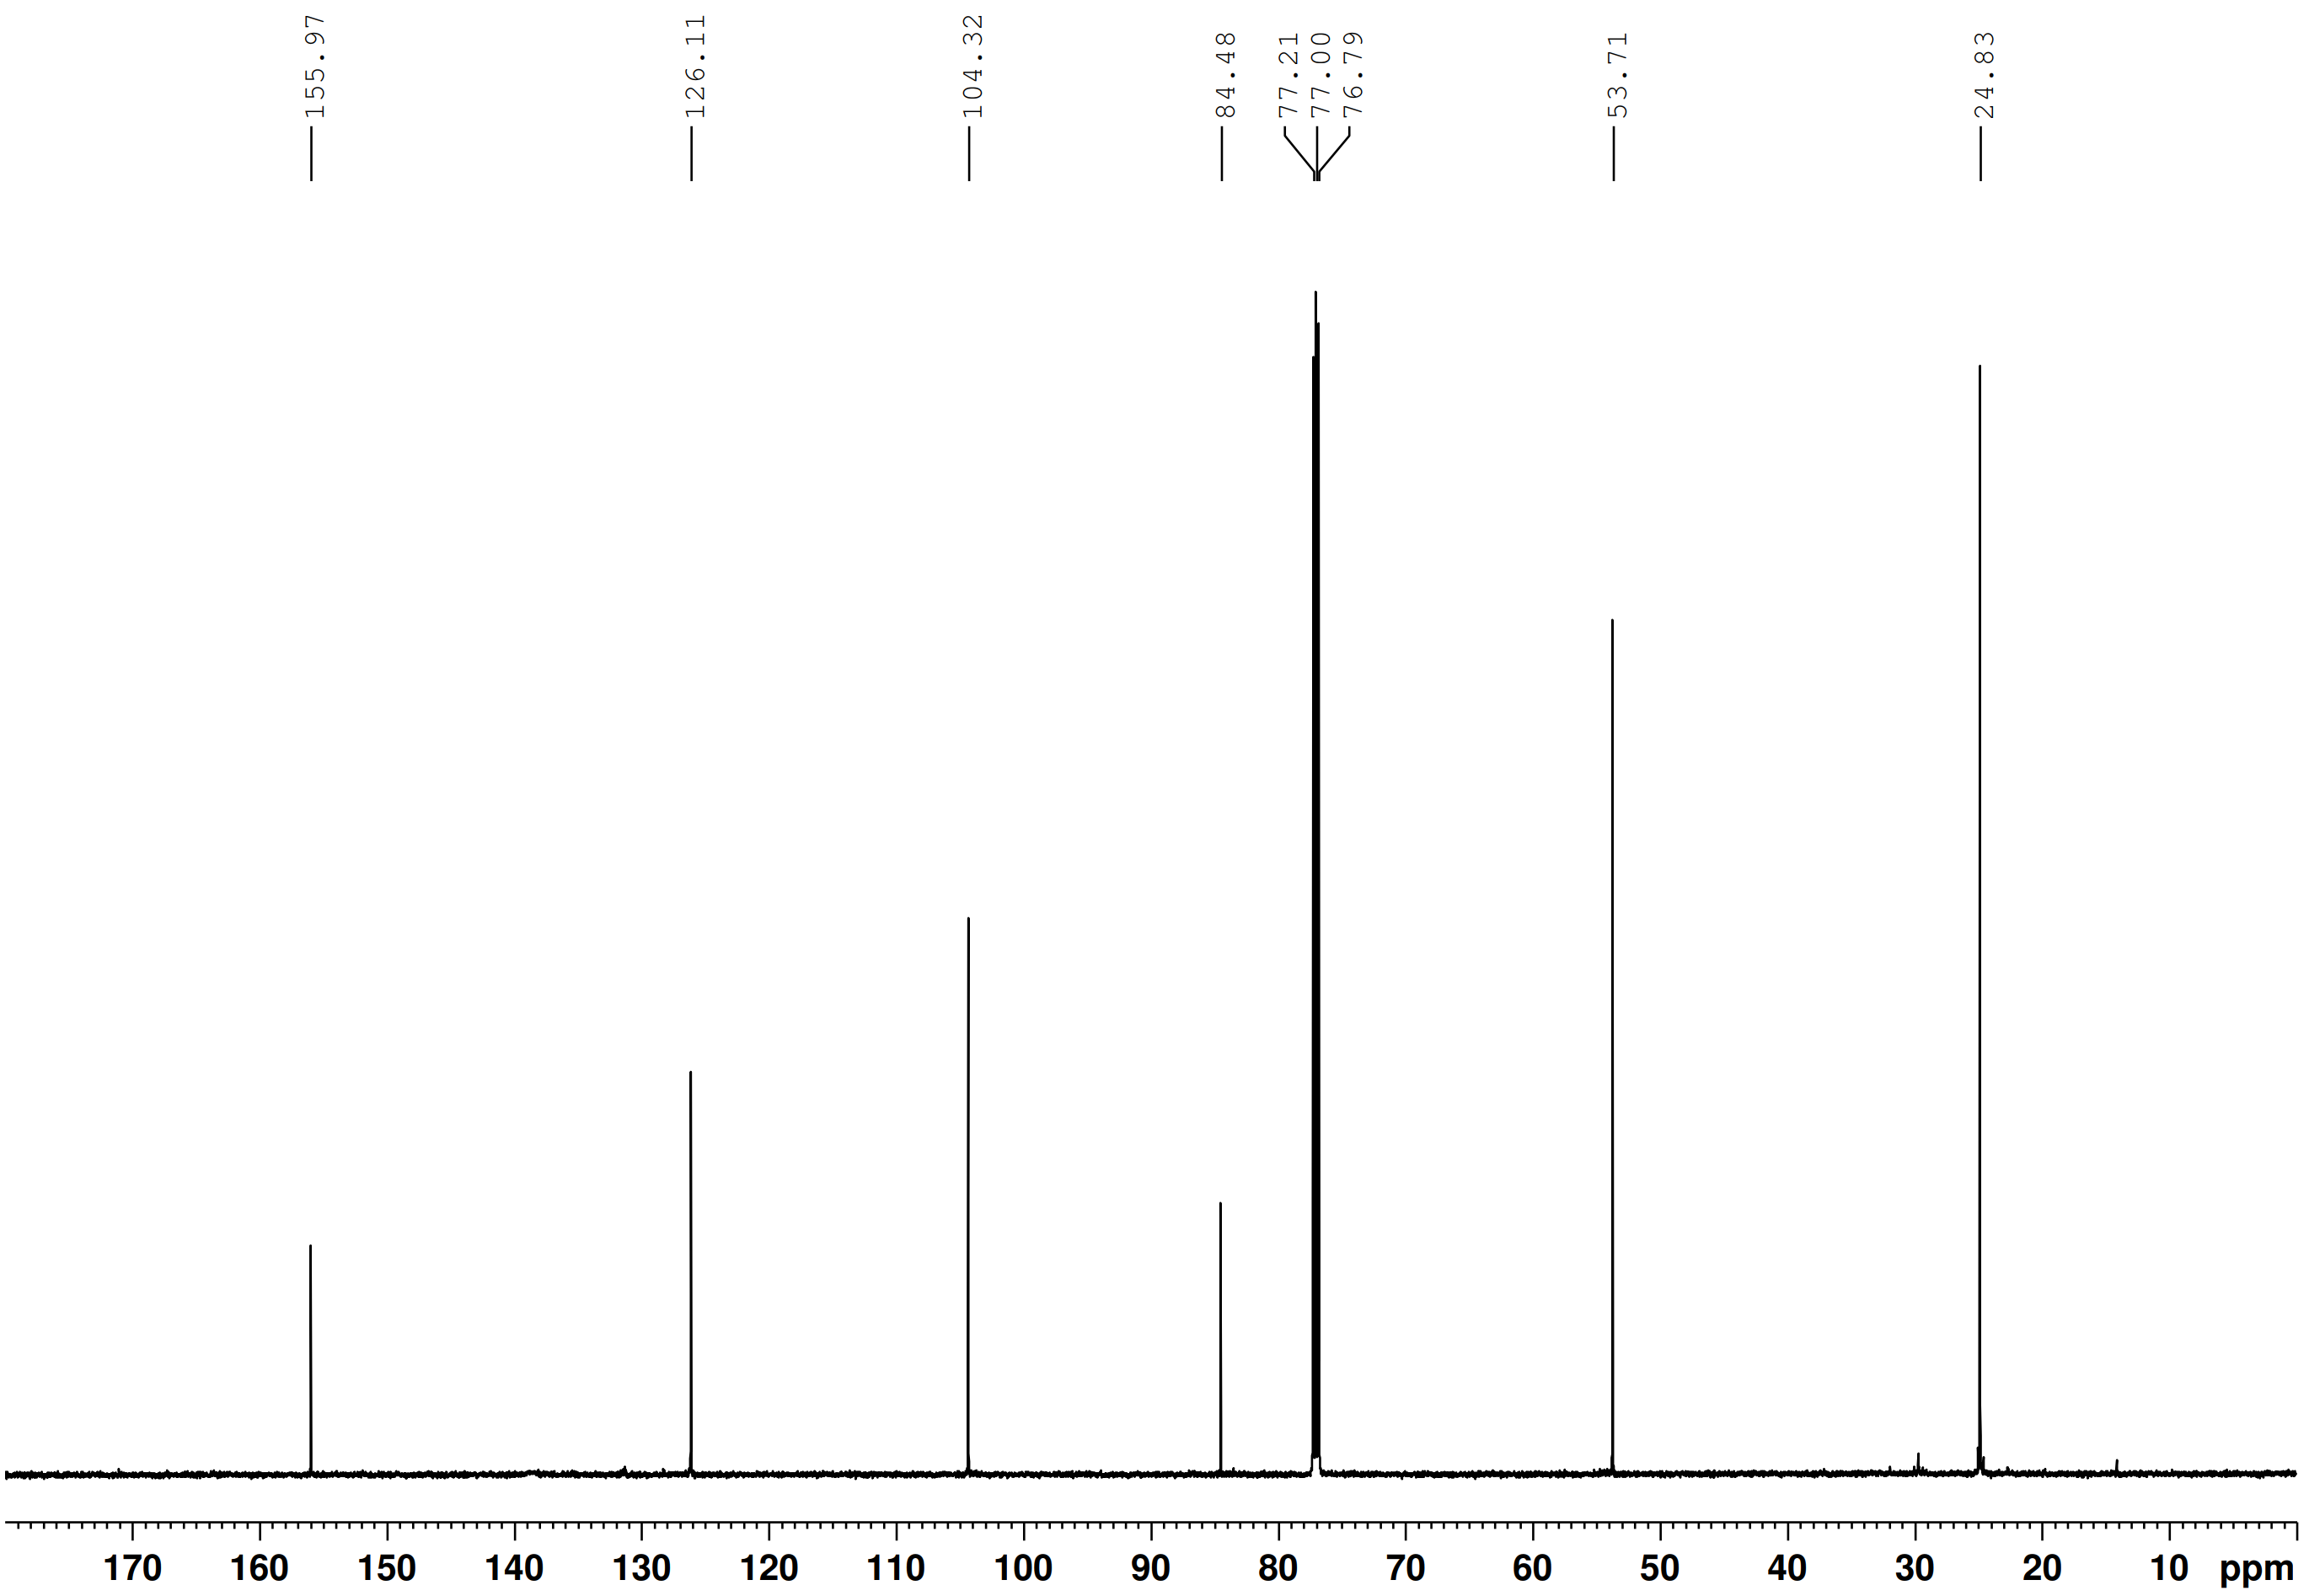


**Supplementary Figure 58 |** 13C NMR spectrum of **S5** (150 MHz, CDCl3).


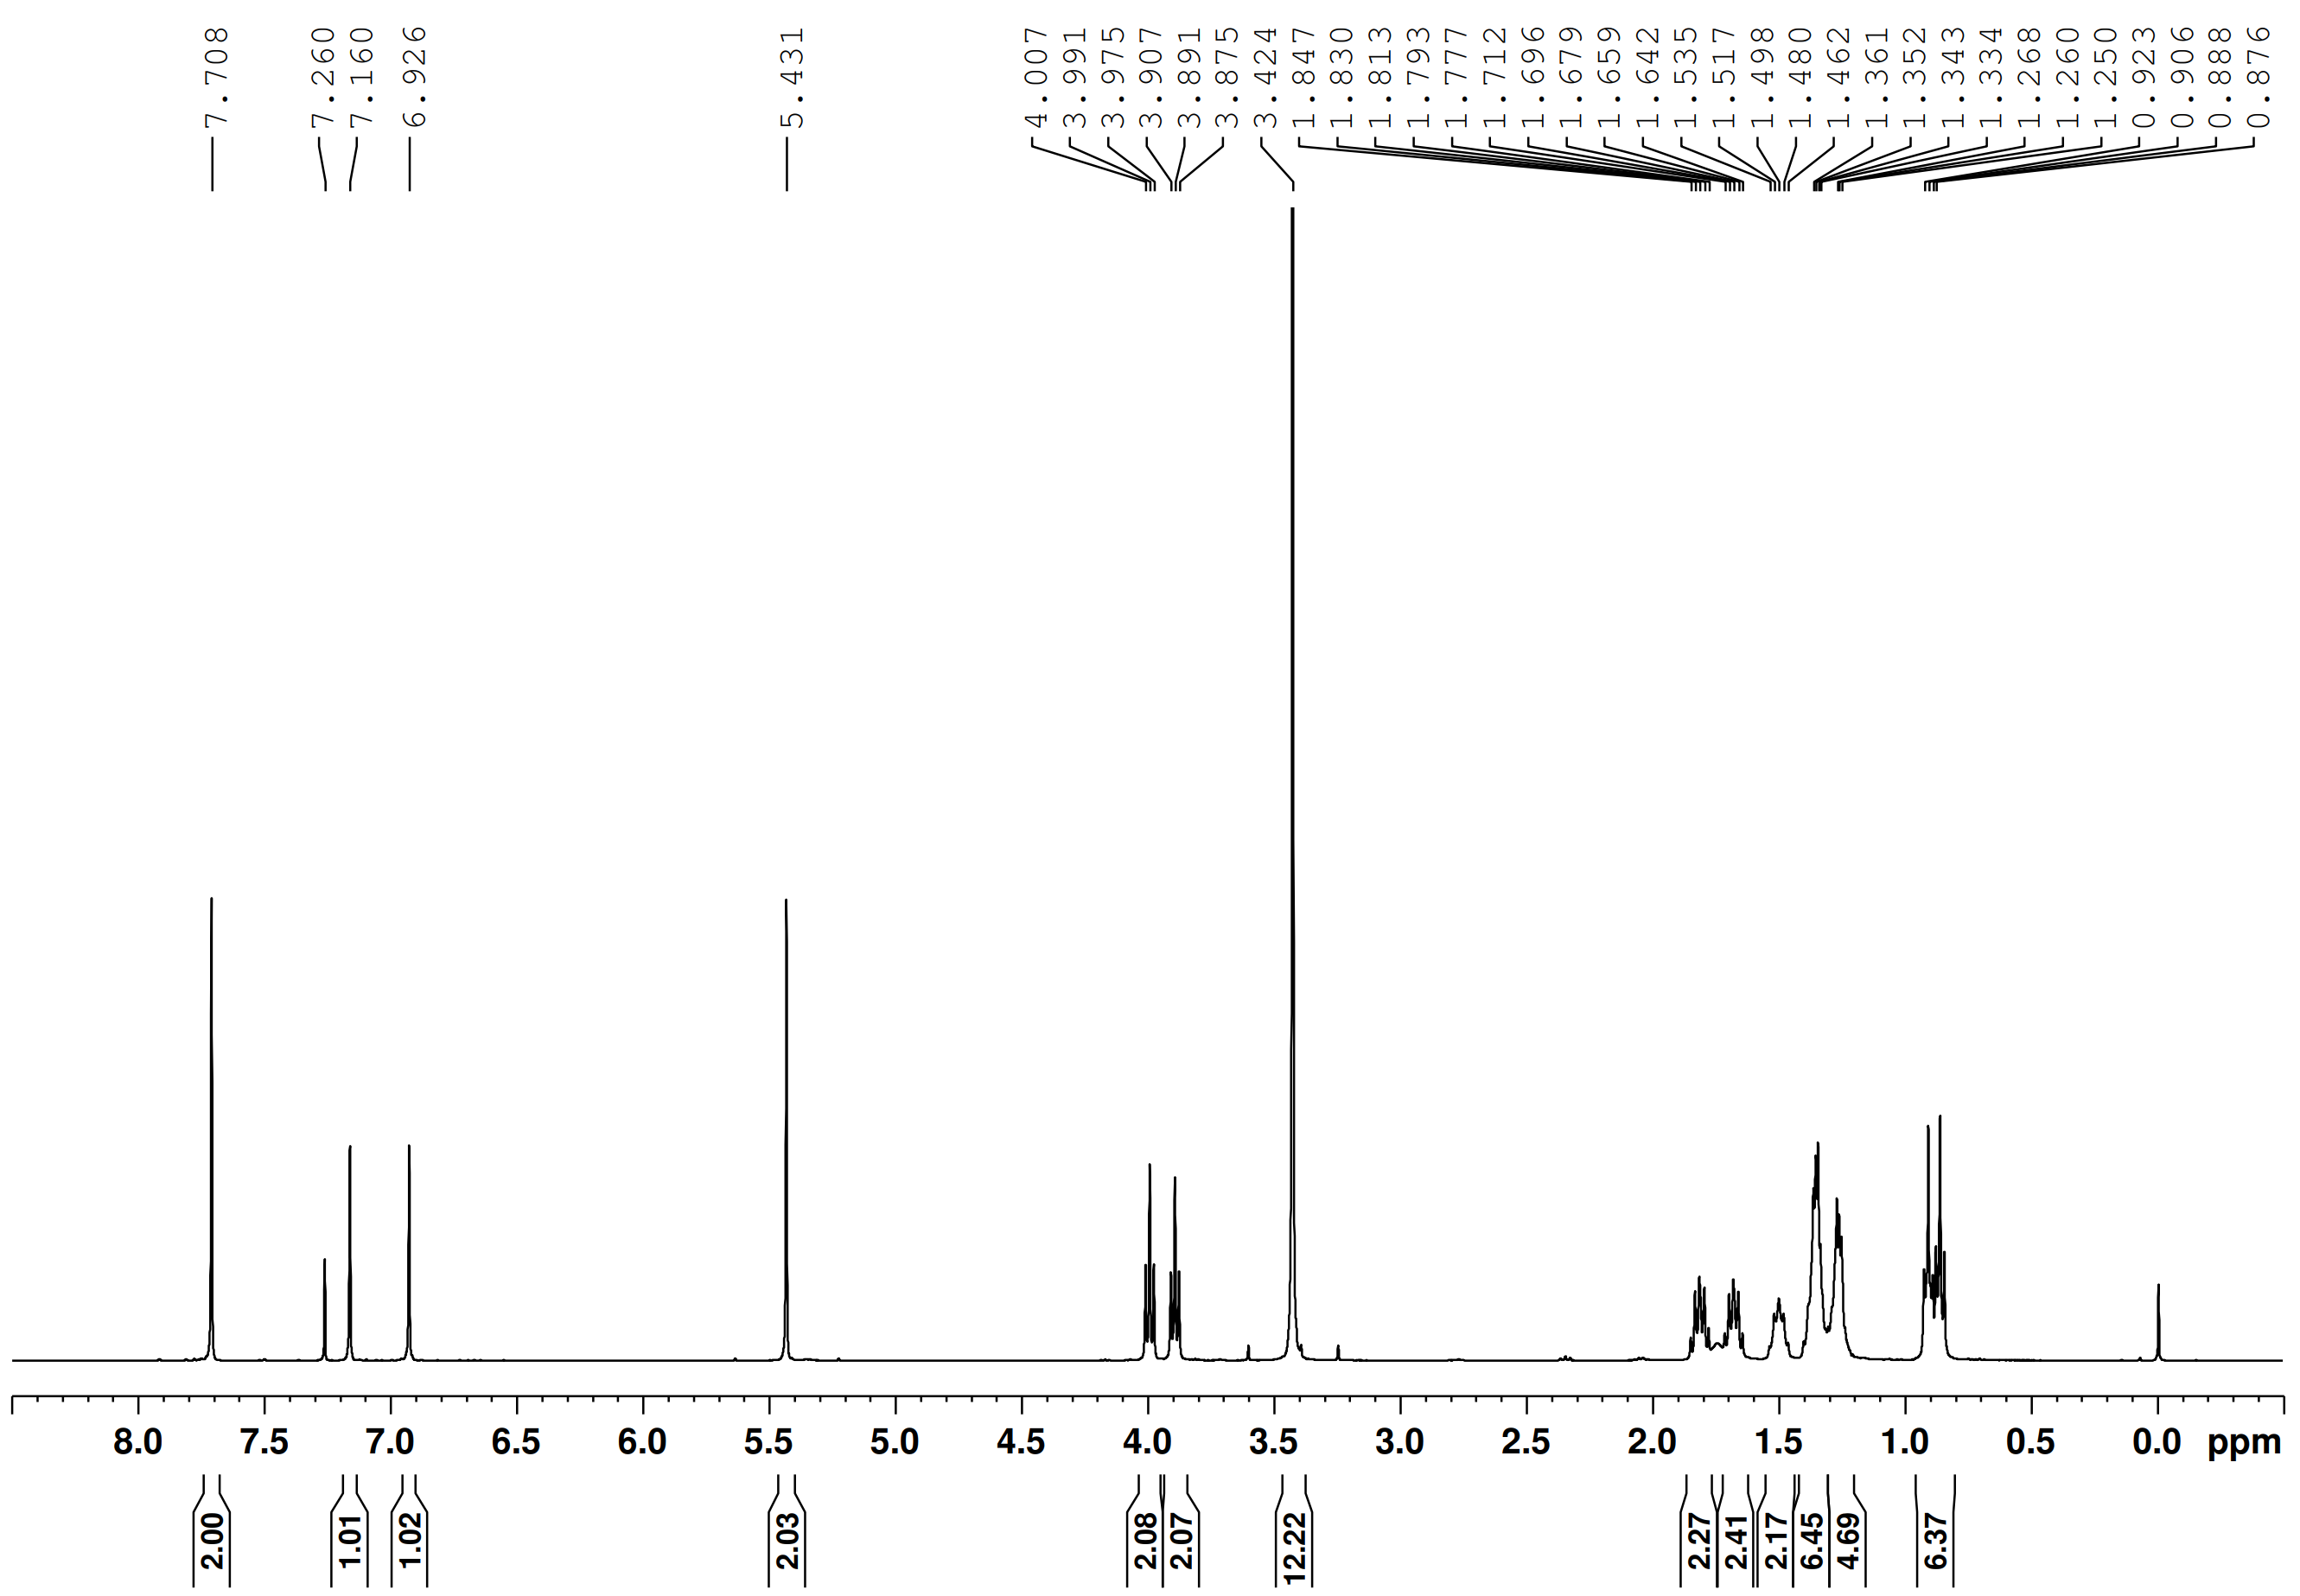


**Supplementary Figure 59 |** 1H NMR spectrum of compound **S6** (400 MHz, CDCl3).


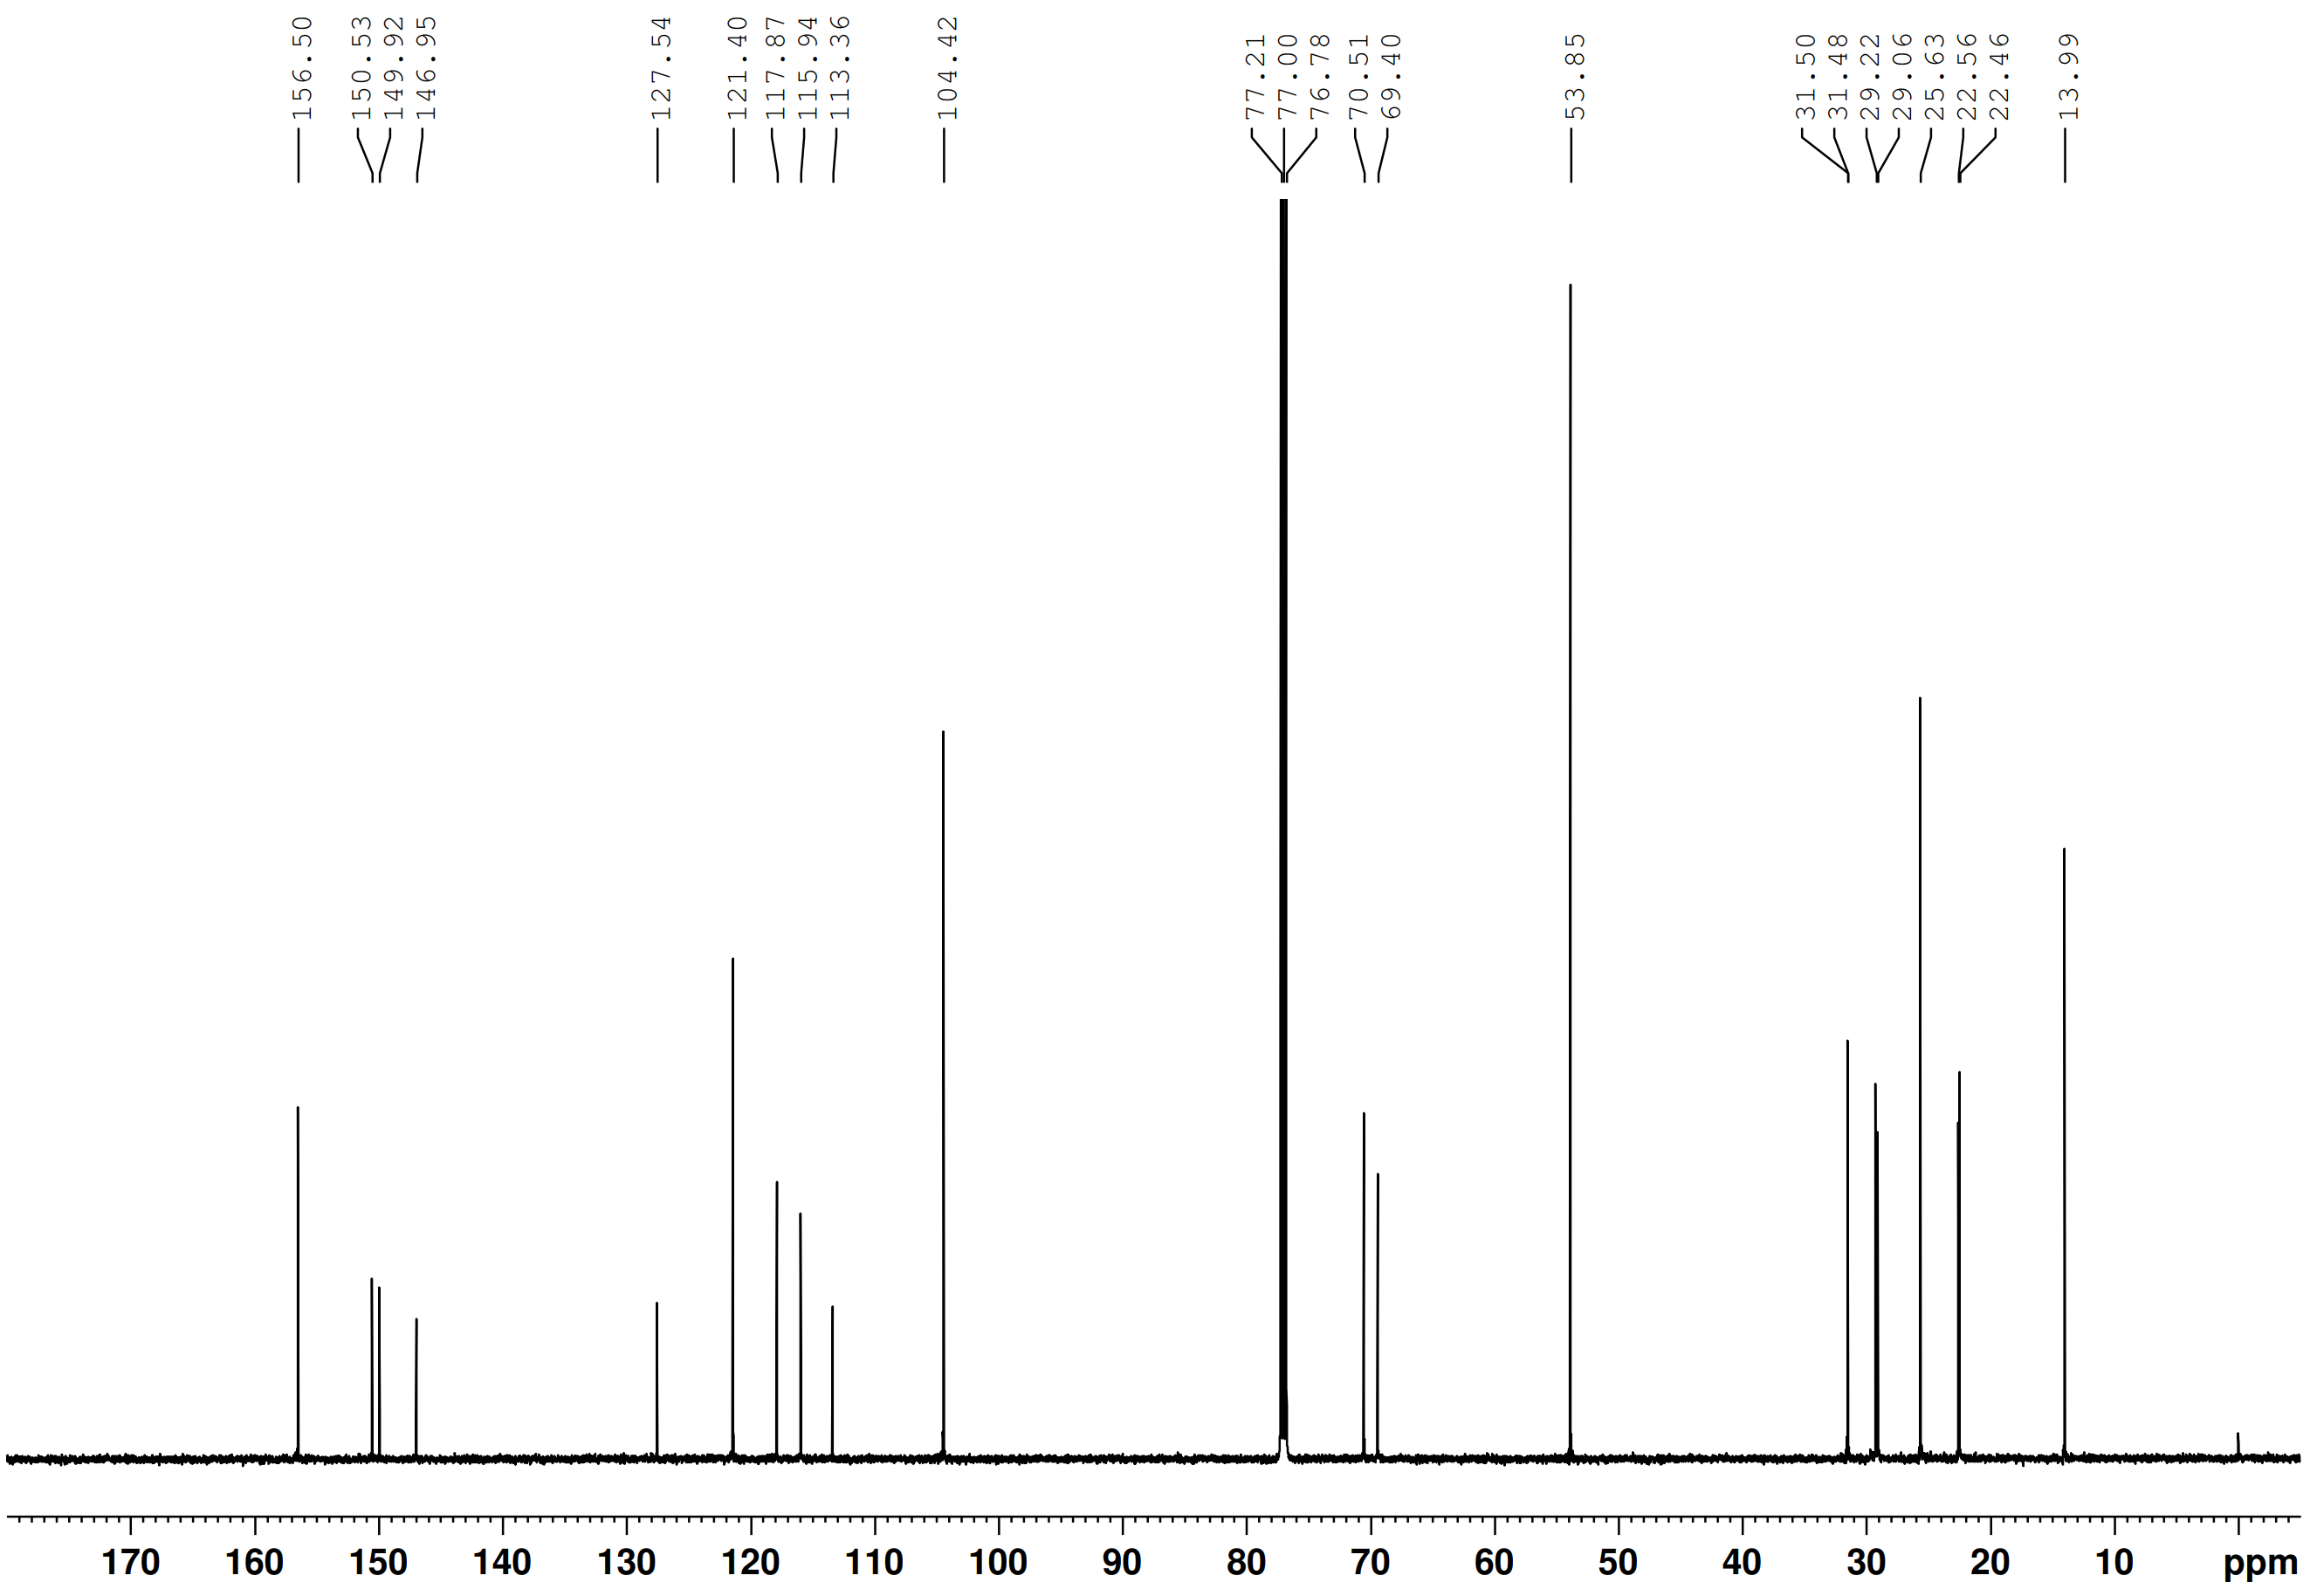


**Supplementary Figure 60 |** 13C NMR spectrum of **S6** (150 MHz, CDCl3).


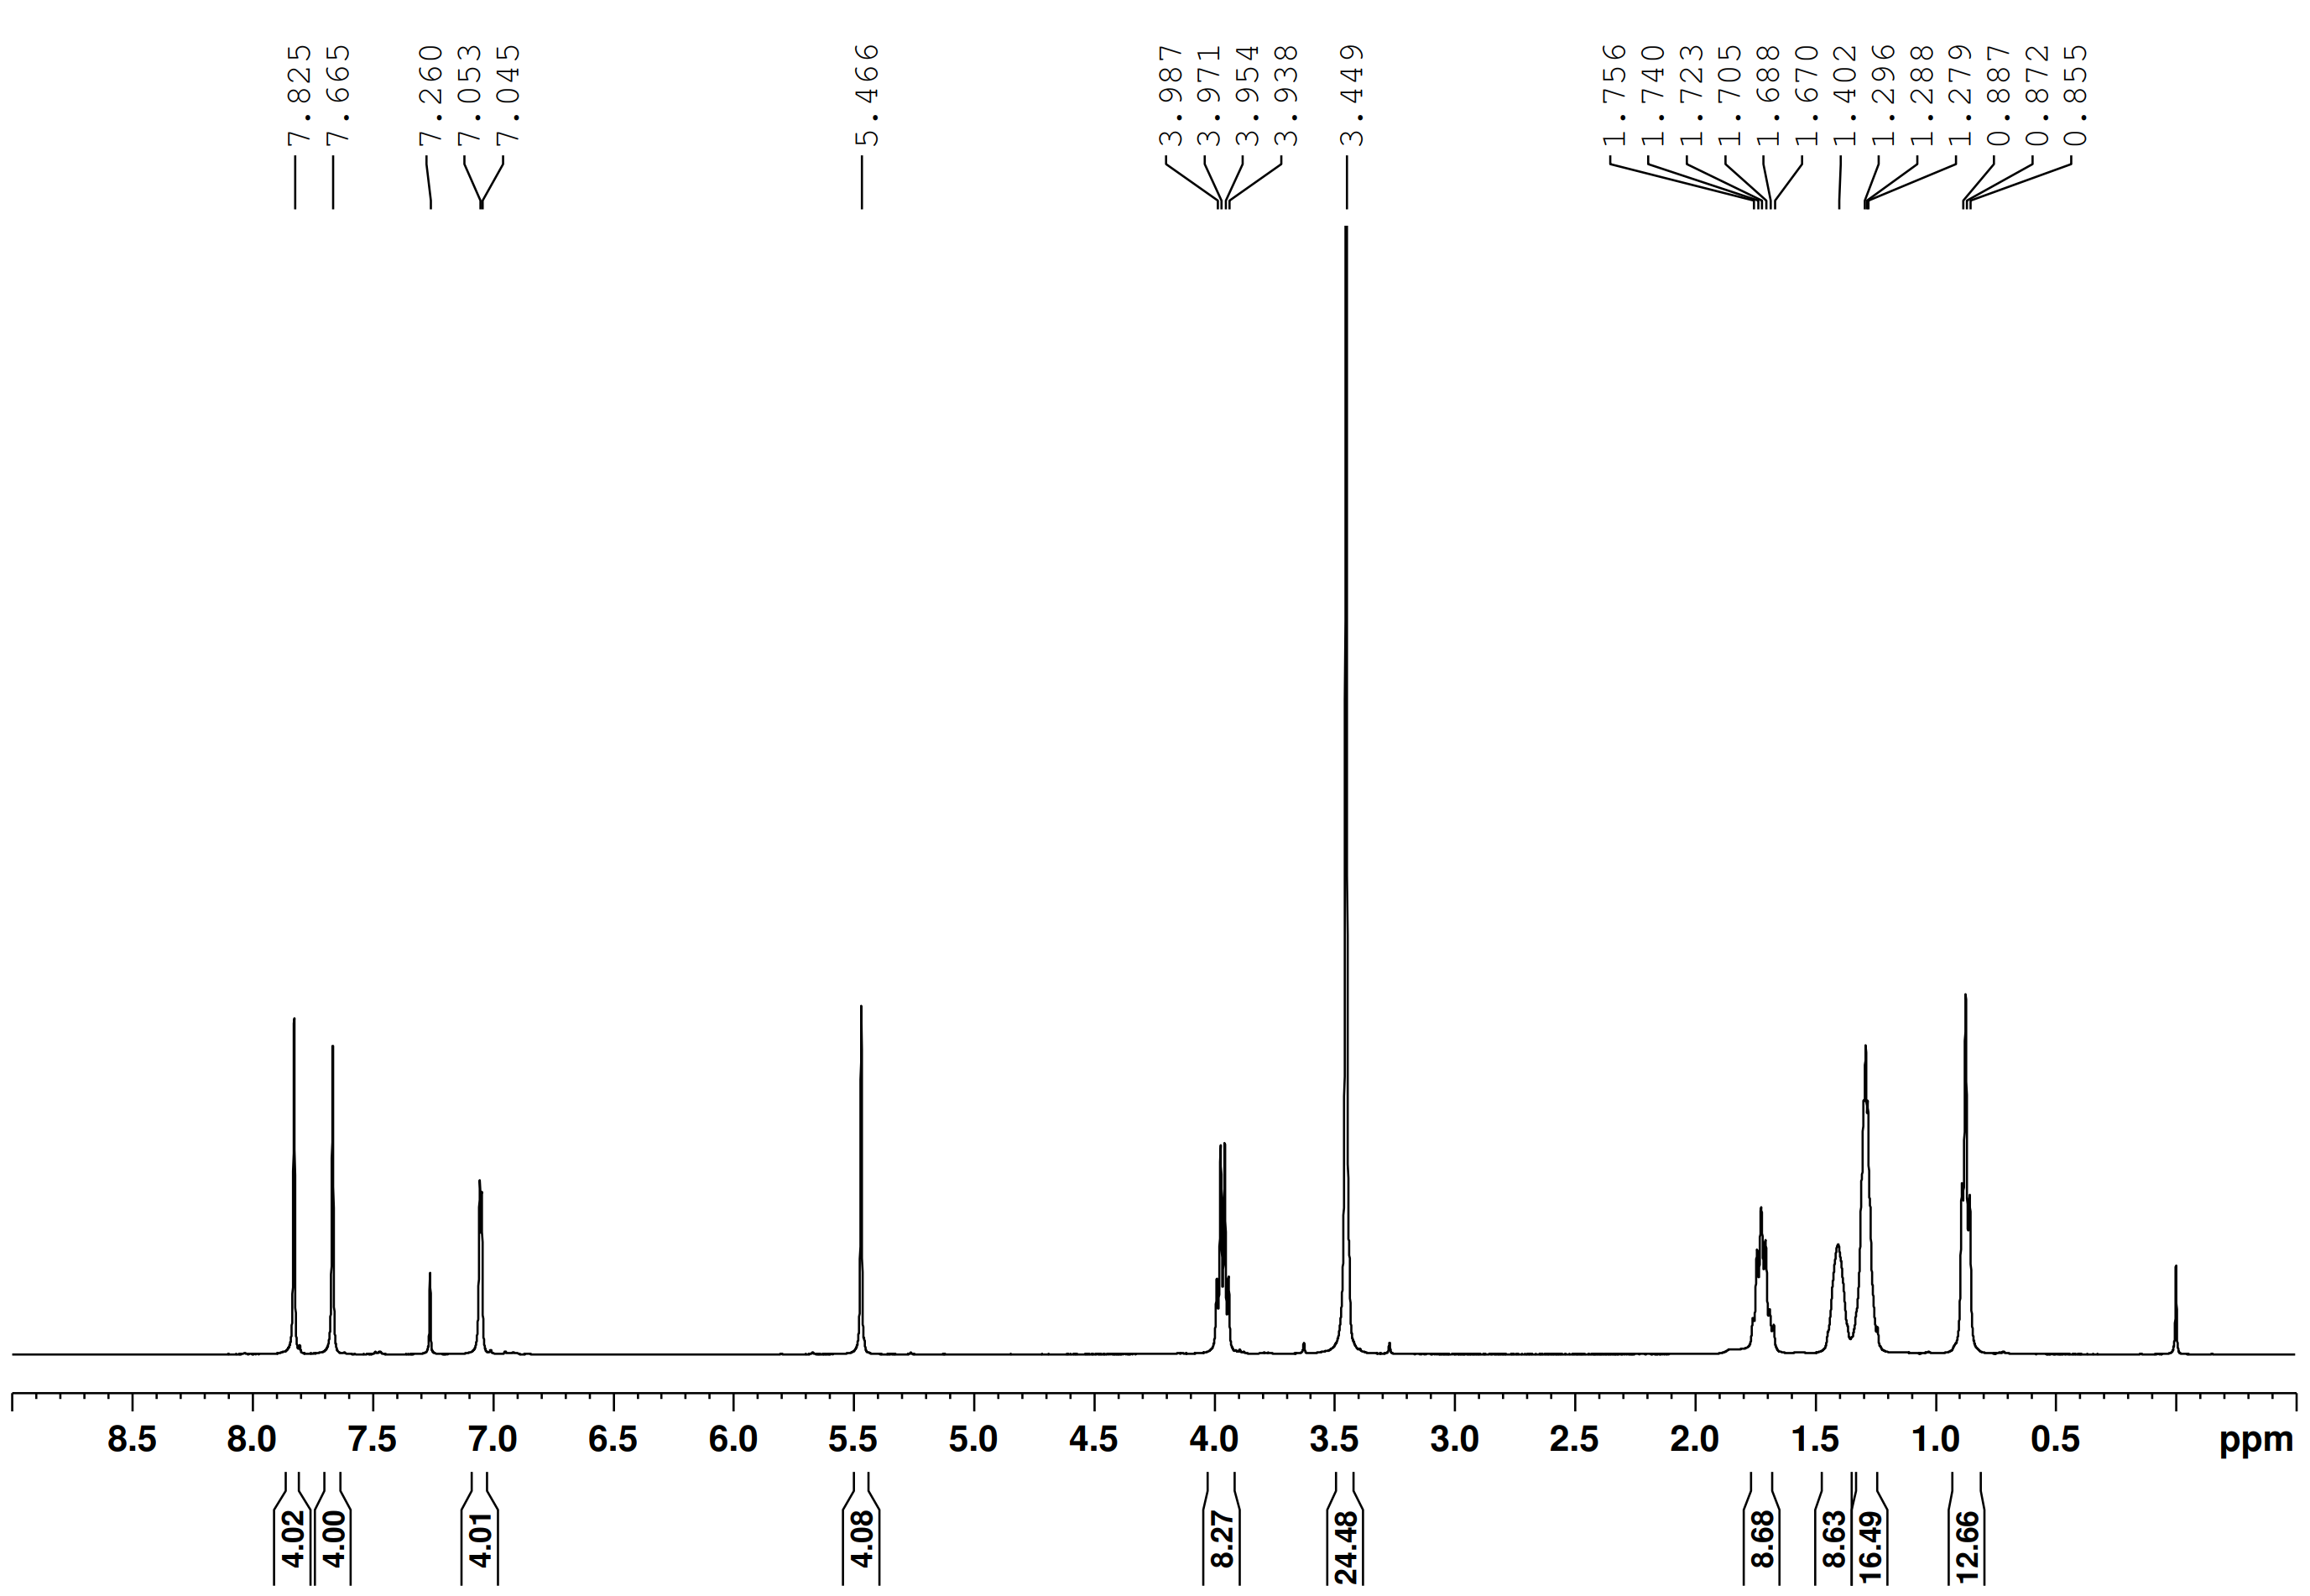


**Supplementary Figure 61 |** 1H NMR spectrum of building unit **E2** (400 MHz, CDCl3).


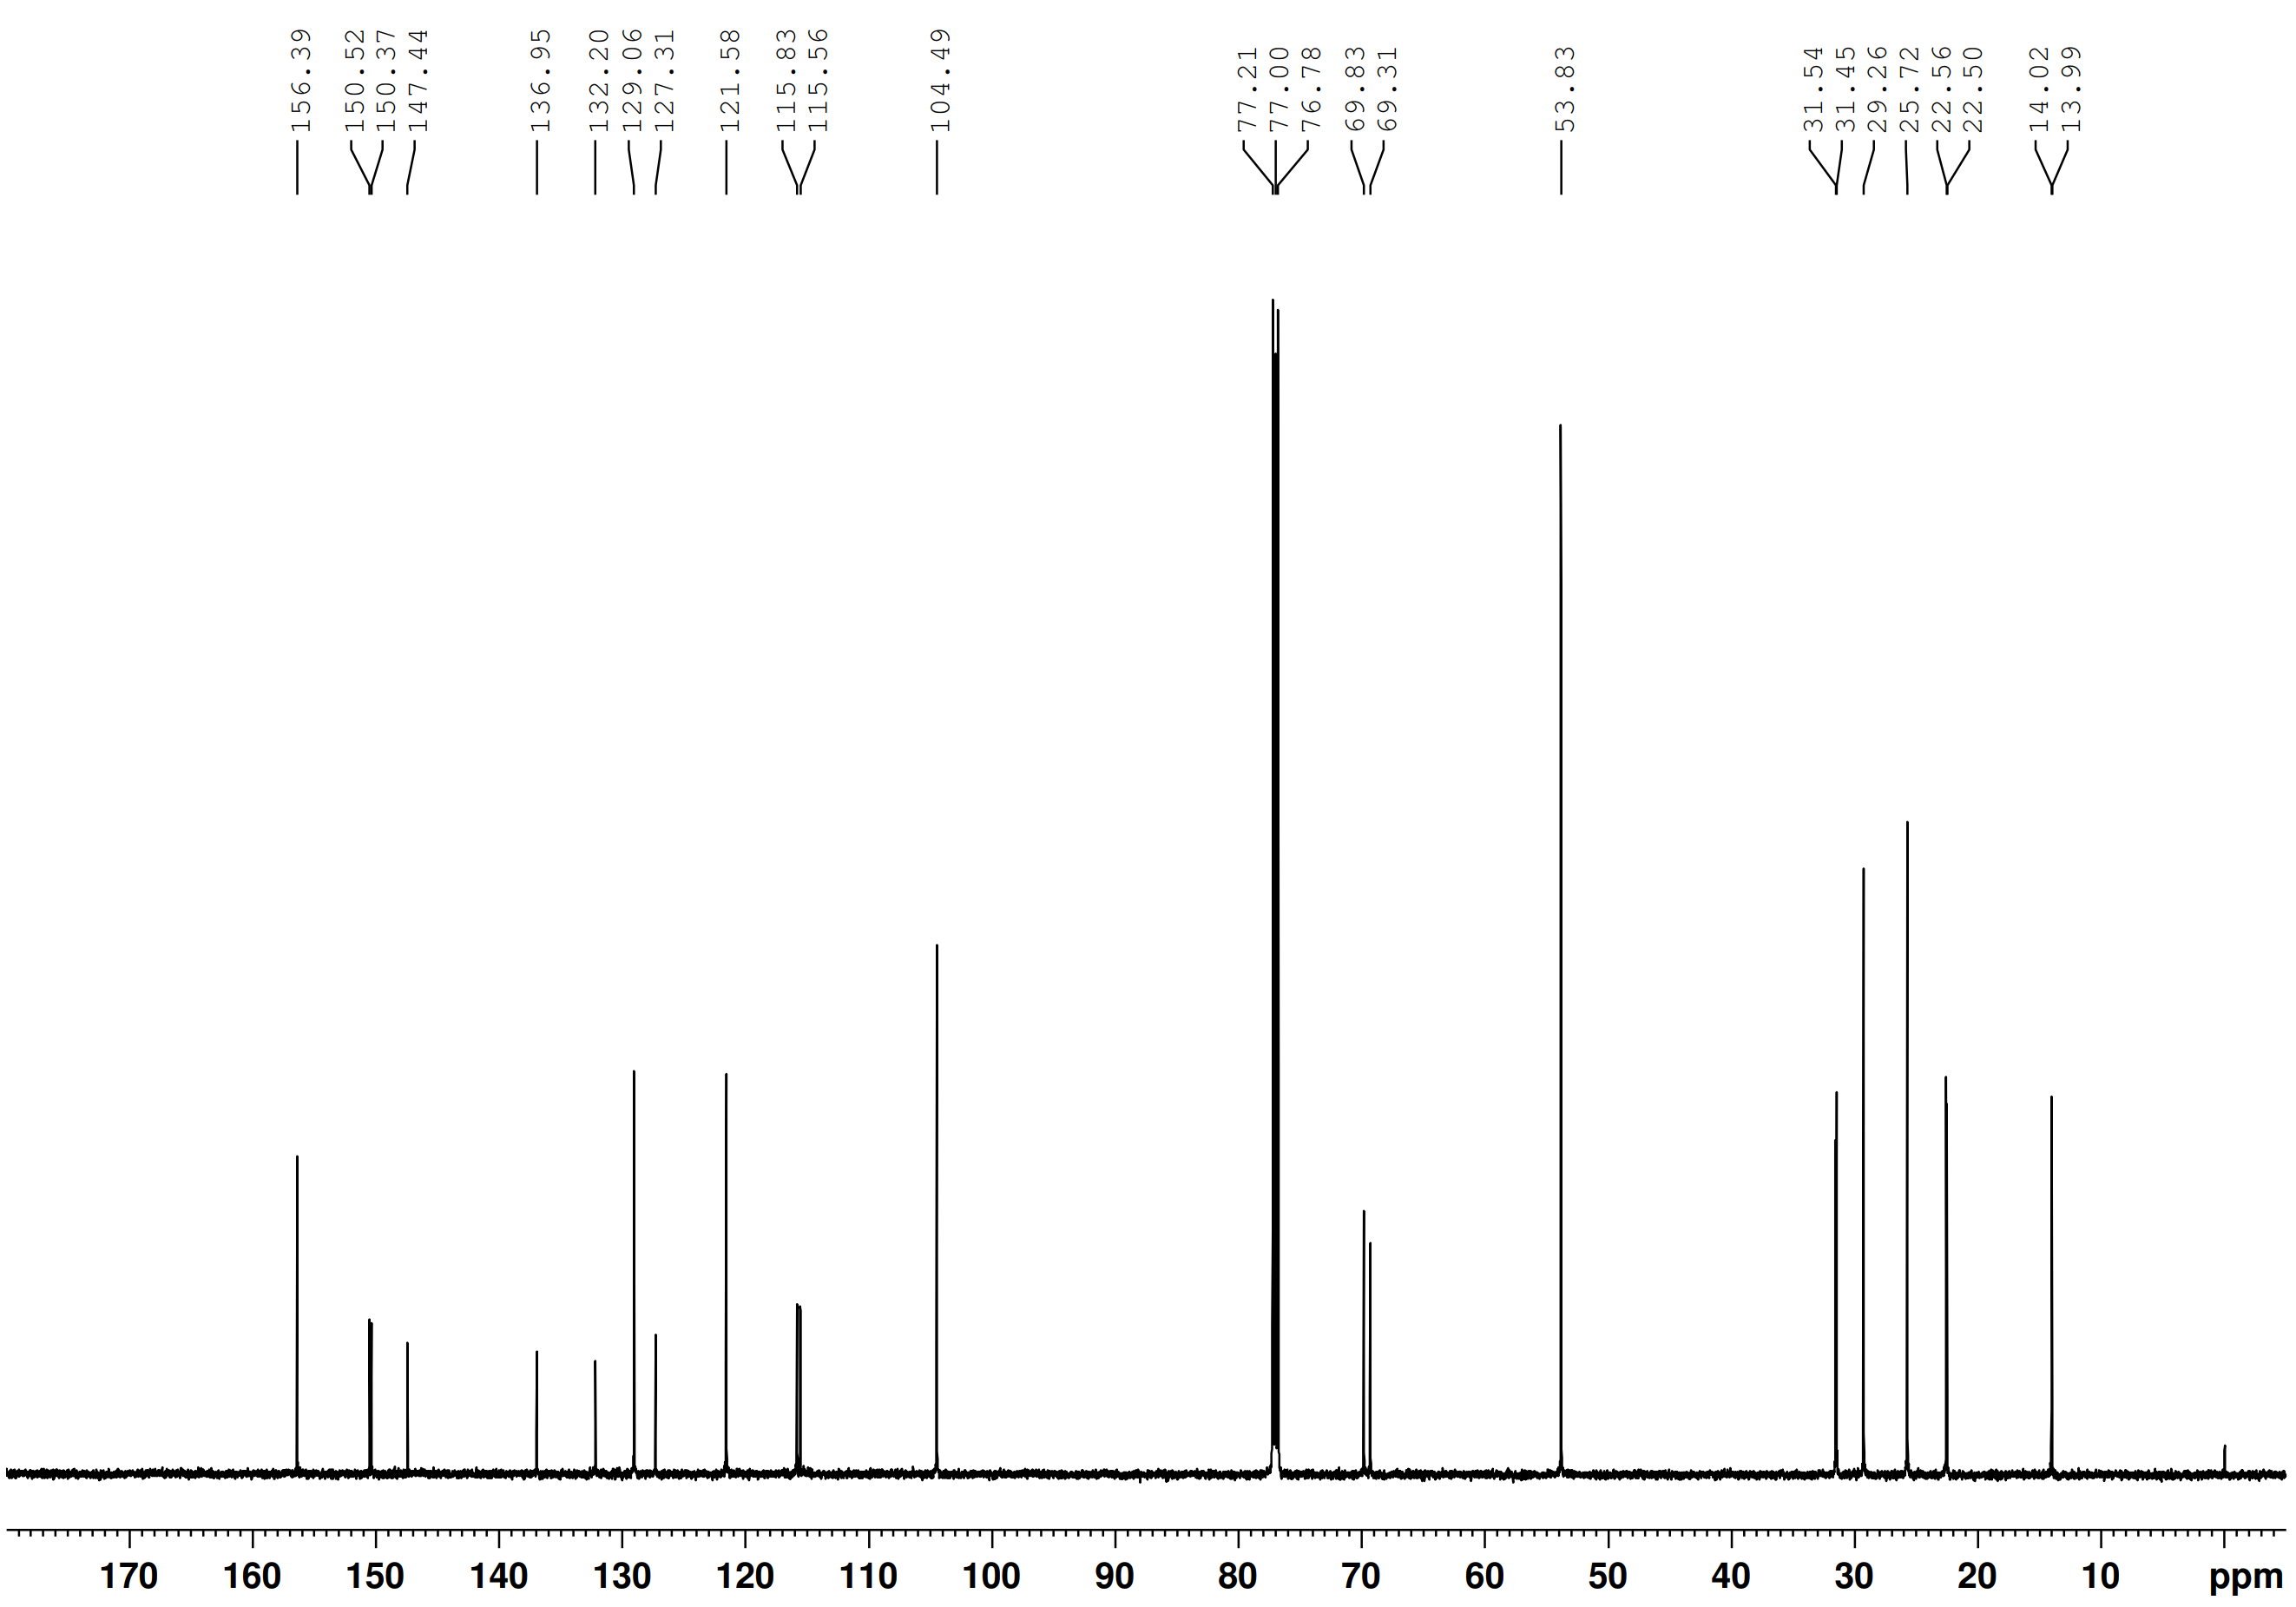


**Supplementary Figure 62 |** 13C NMR spectrum of building unit **E2** (150 MHz, CDCl3).


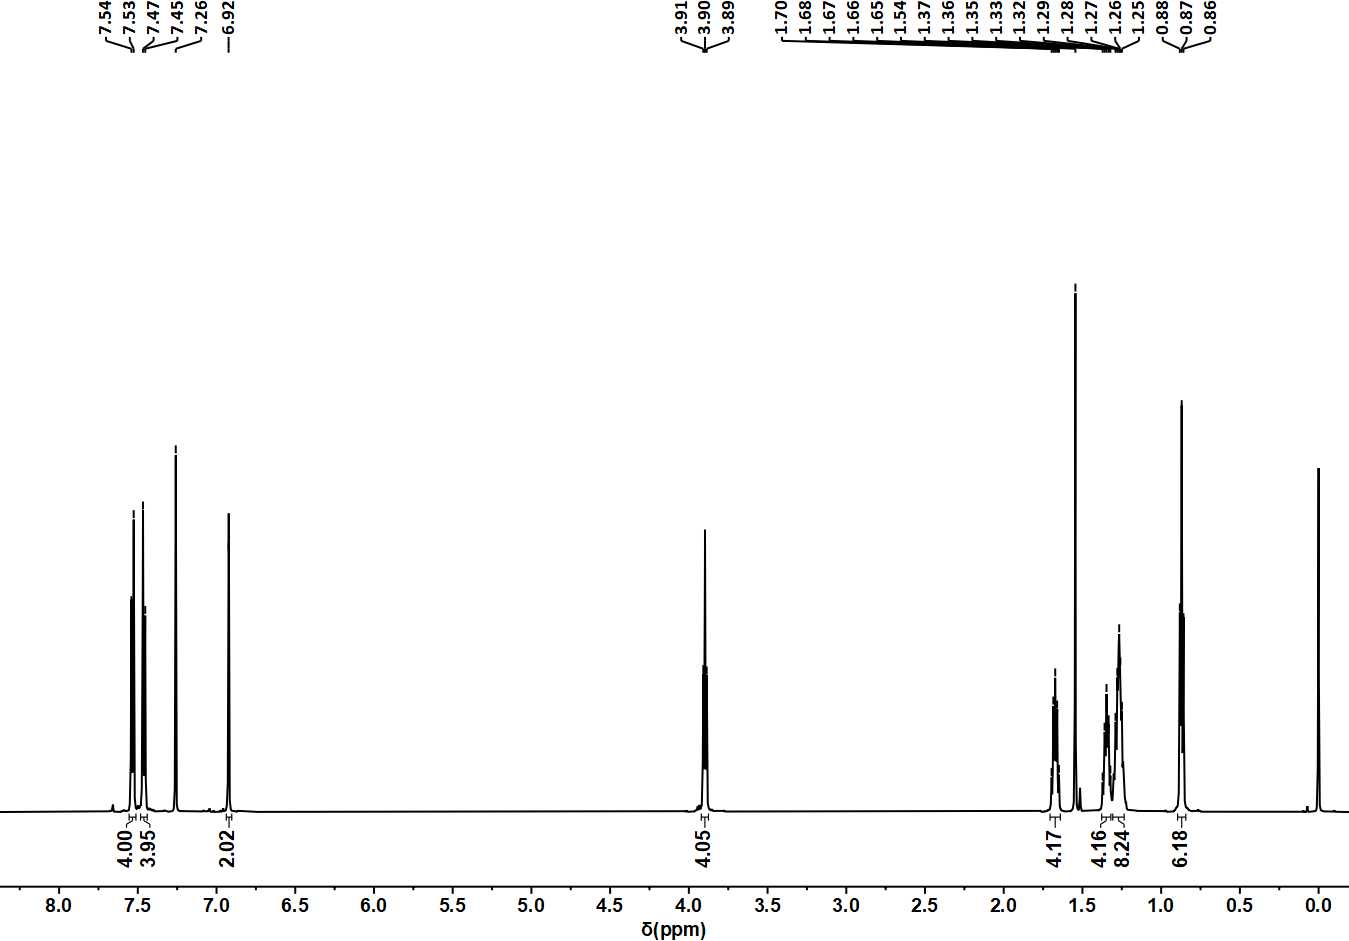


**Supplementary Figure 63 |** 1H NMR spectrum of compound **S7** (600 MHz, CDCl3).


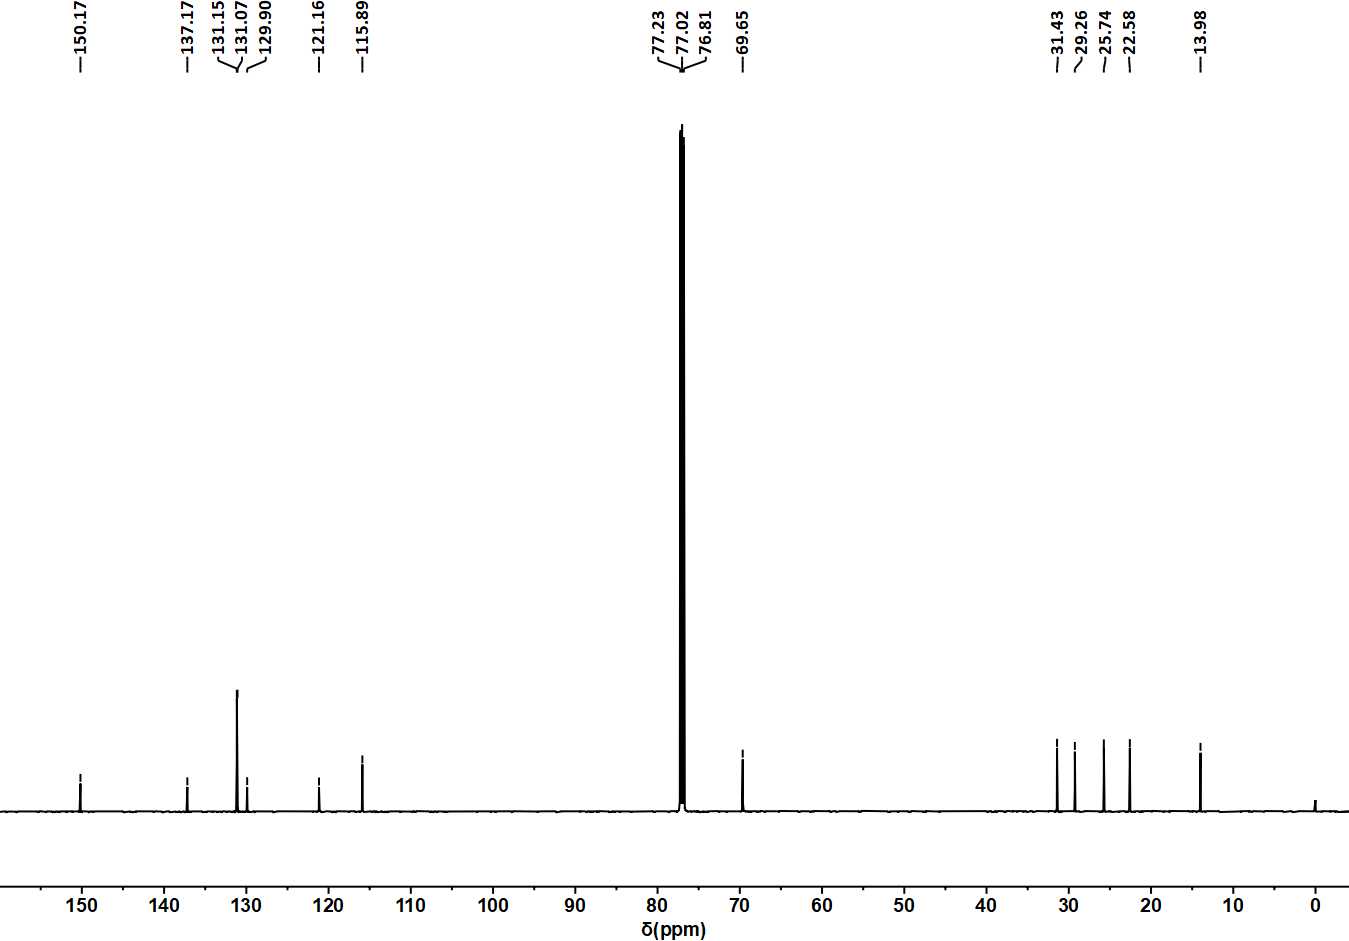


**Supplementary Figure 64 |** 13C NMR spectrum of **S7** (150 MHz, CDCl3).


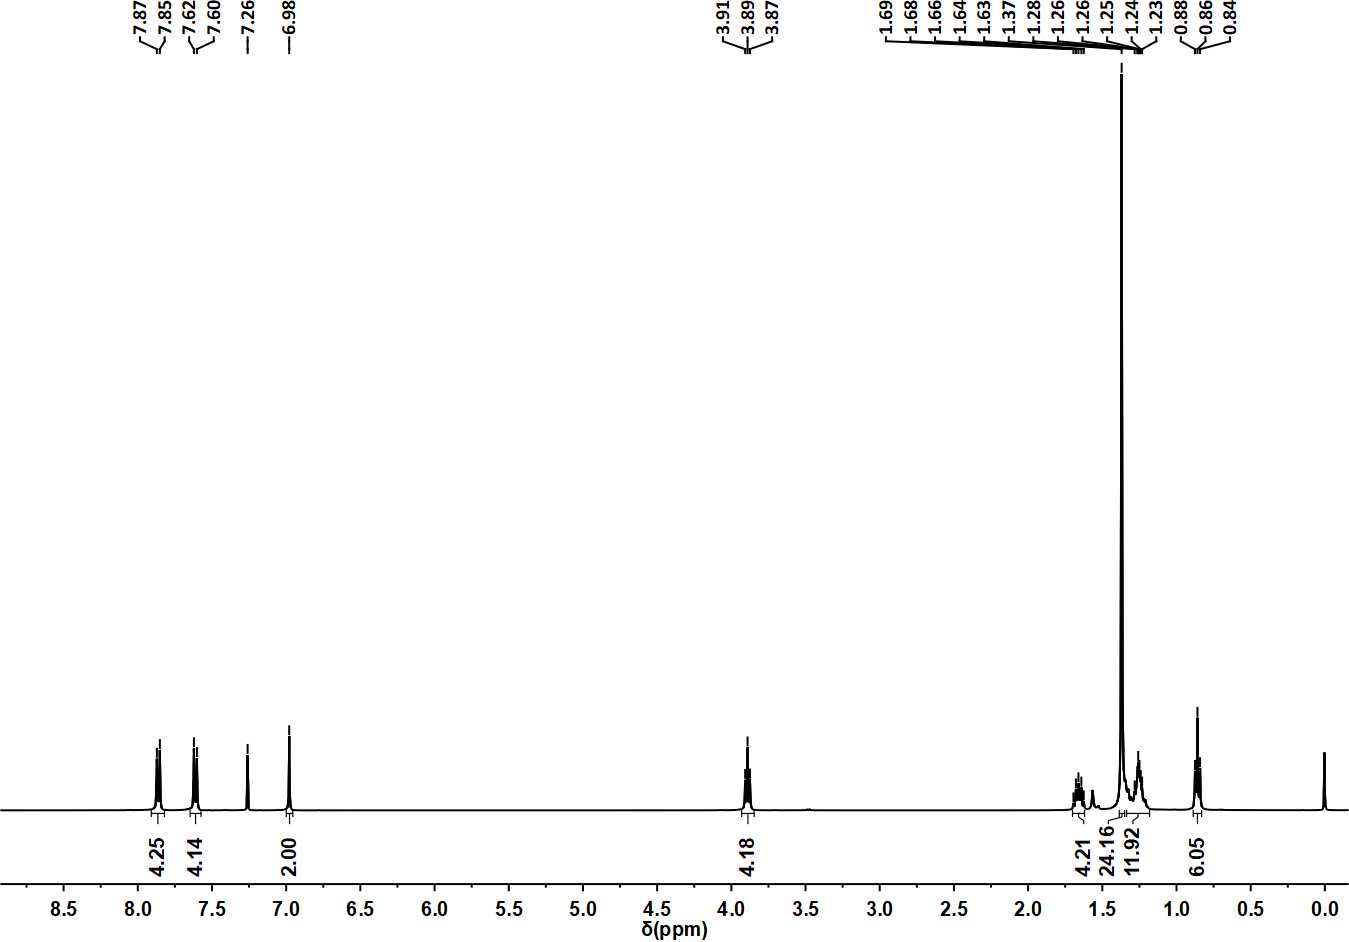


**Supplementary Figure 65 |** 1H NMR spectrum of compound **S8** (400 MHz, CDCl3).


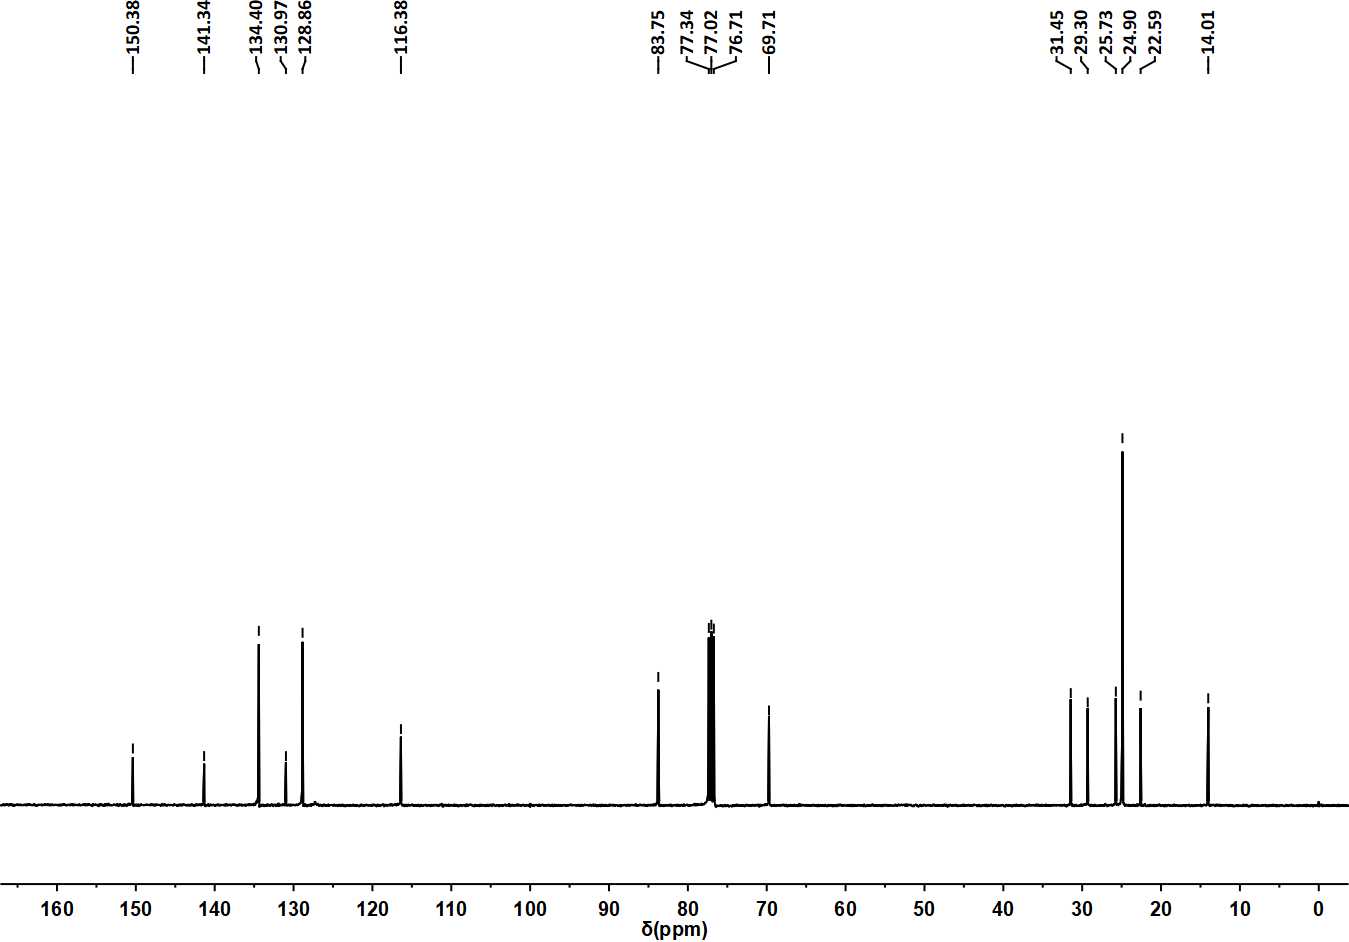


**Supplementary Figure 66 |** 13C NMR spectrum of **S8** (100 MHz, CDCl3).


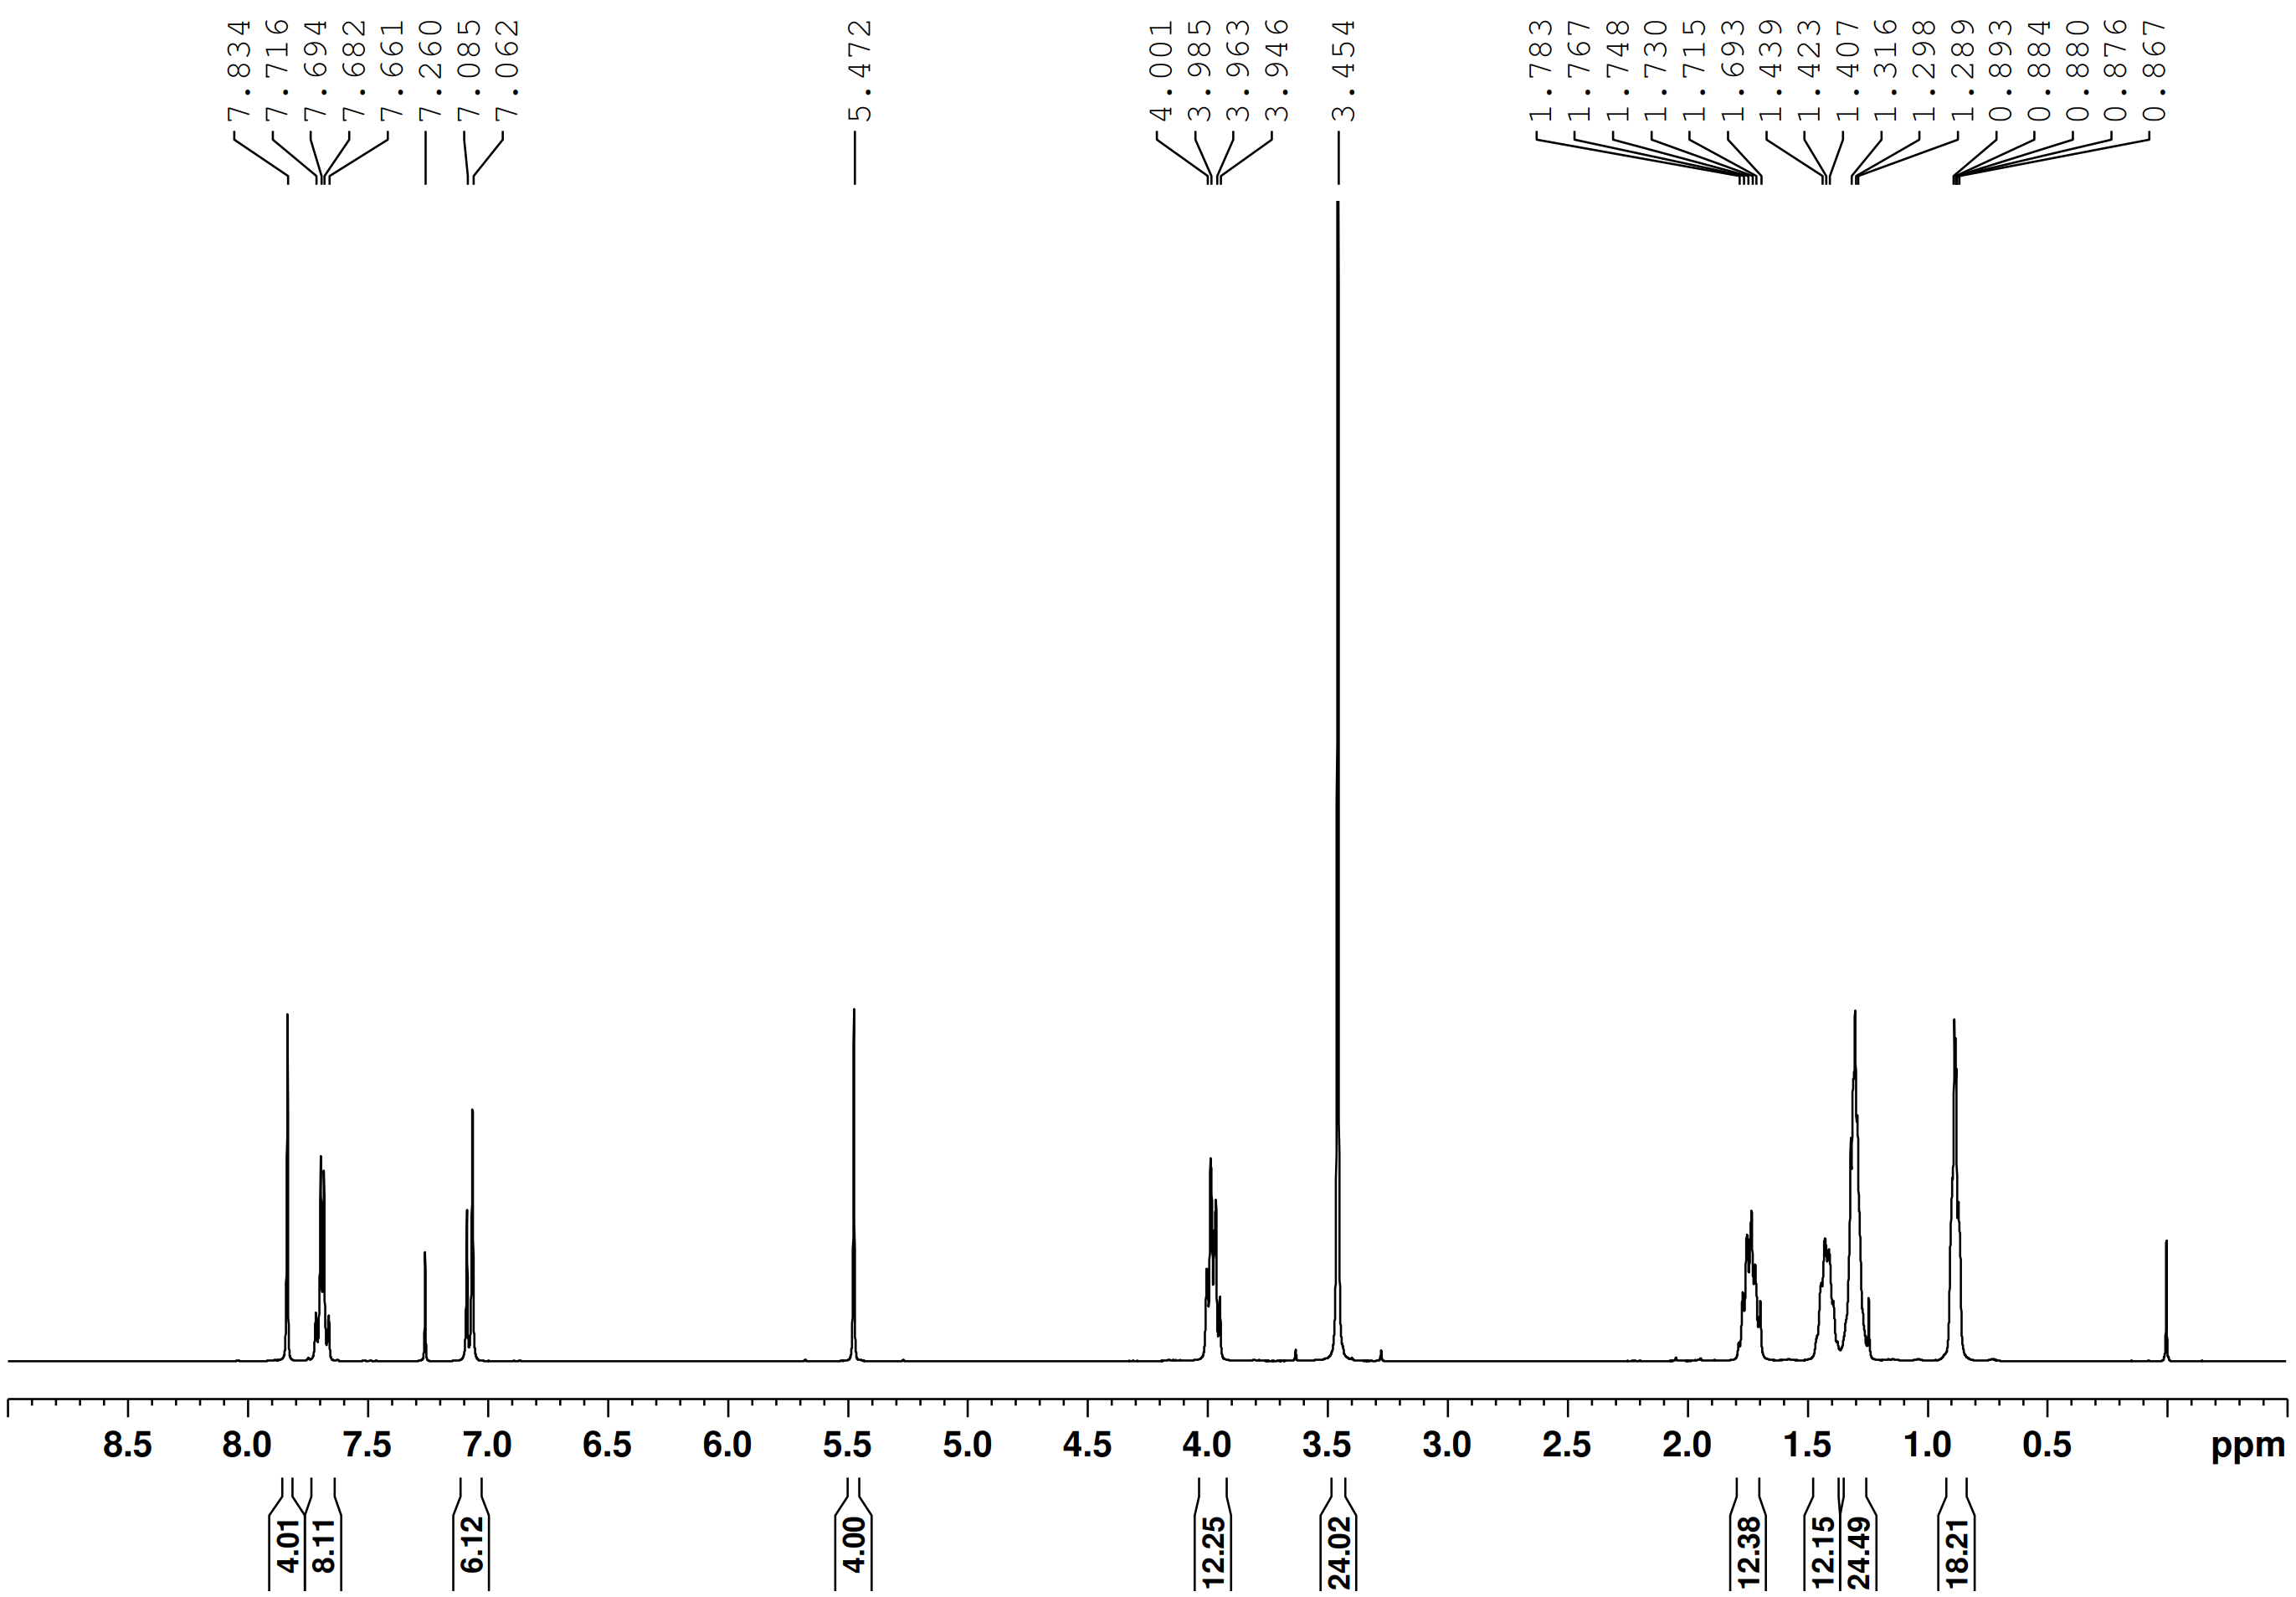


**Supplementary Figure 67 |** 1H NMR spectrum of building unit **E3** (400 MHz, CDCl3).


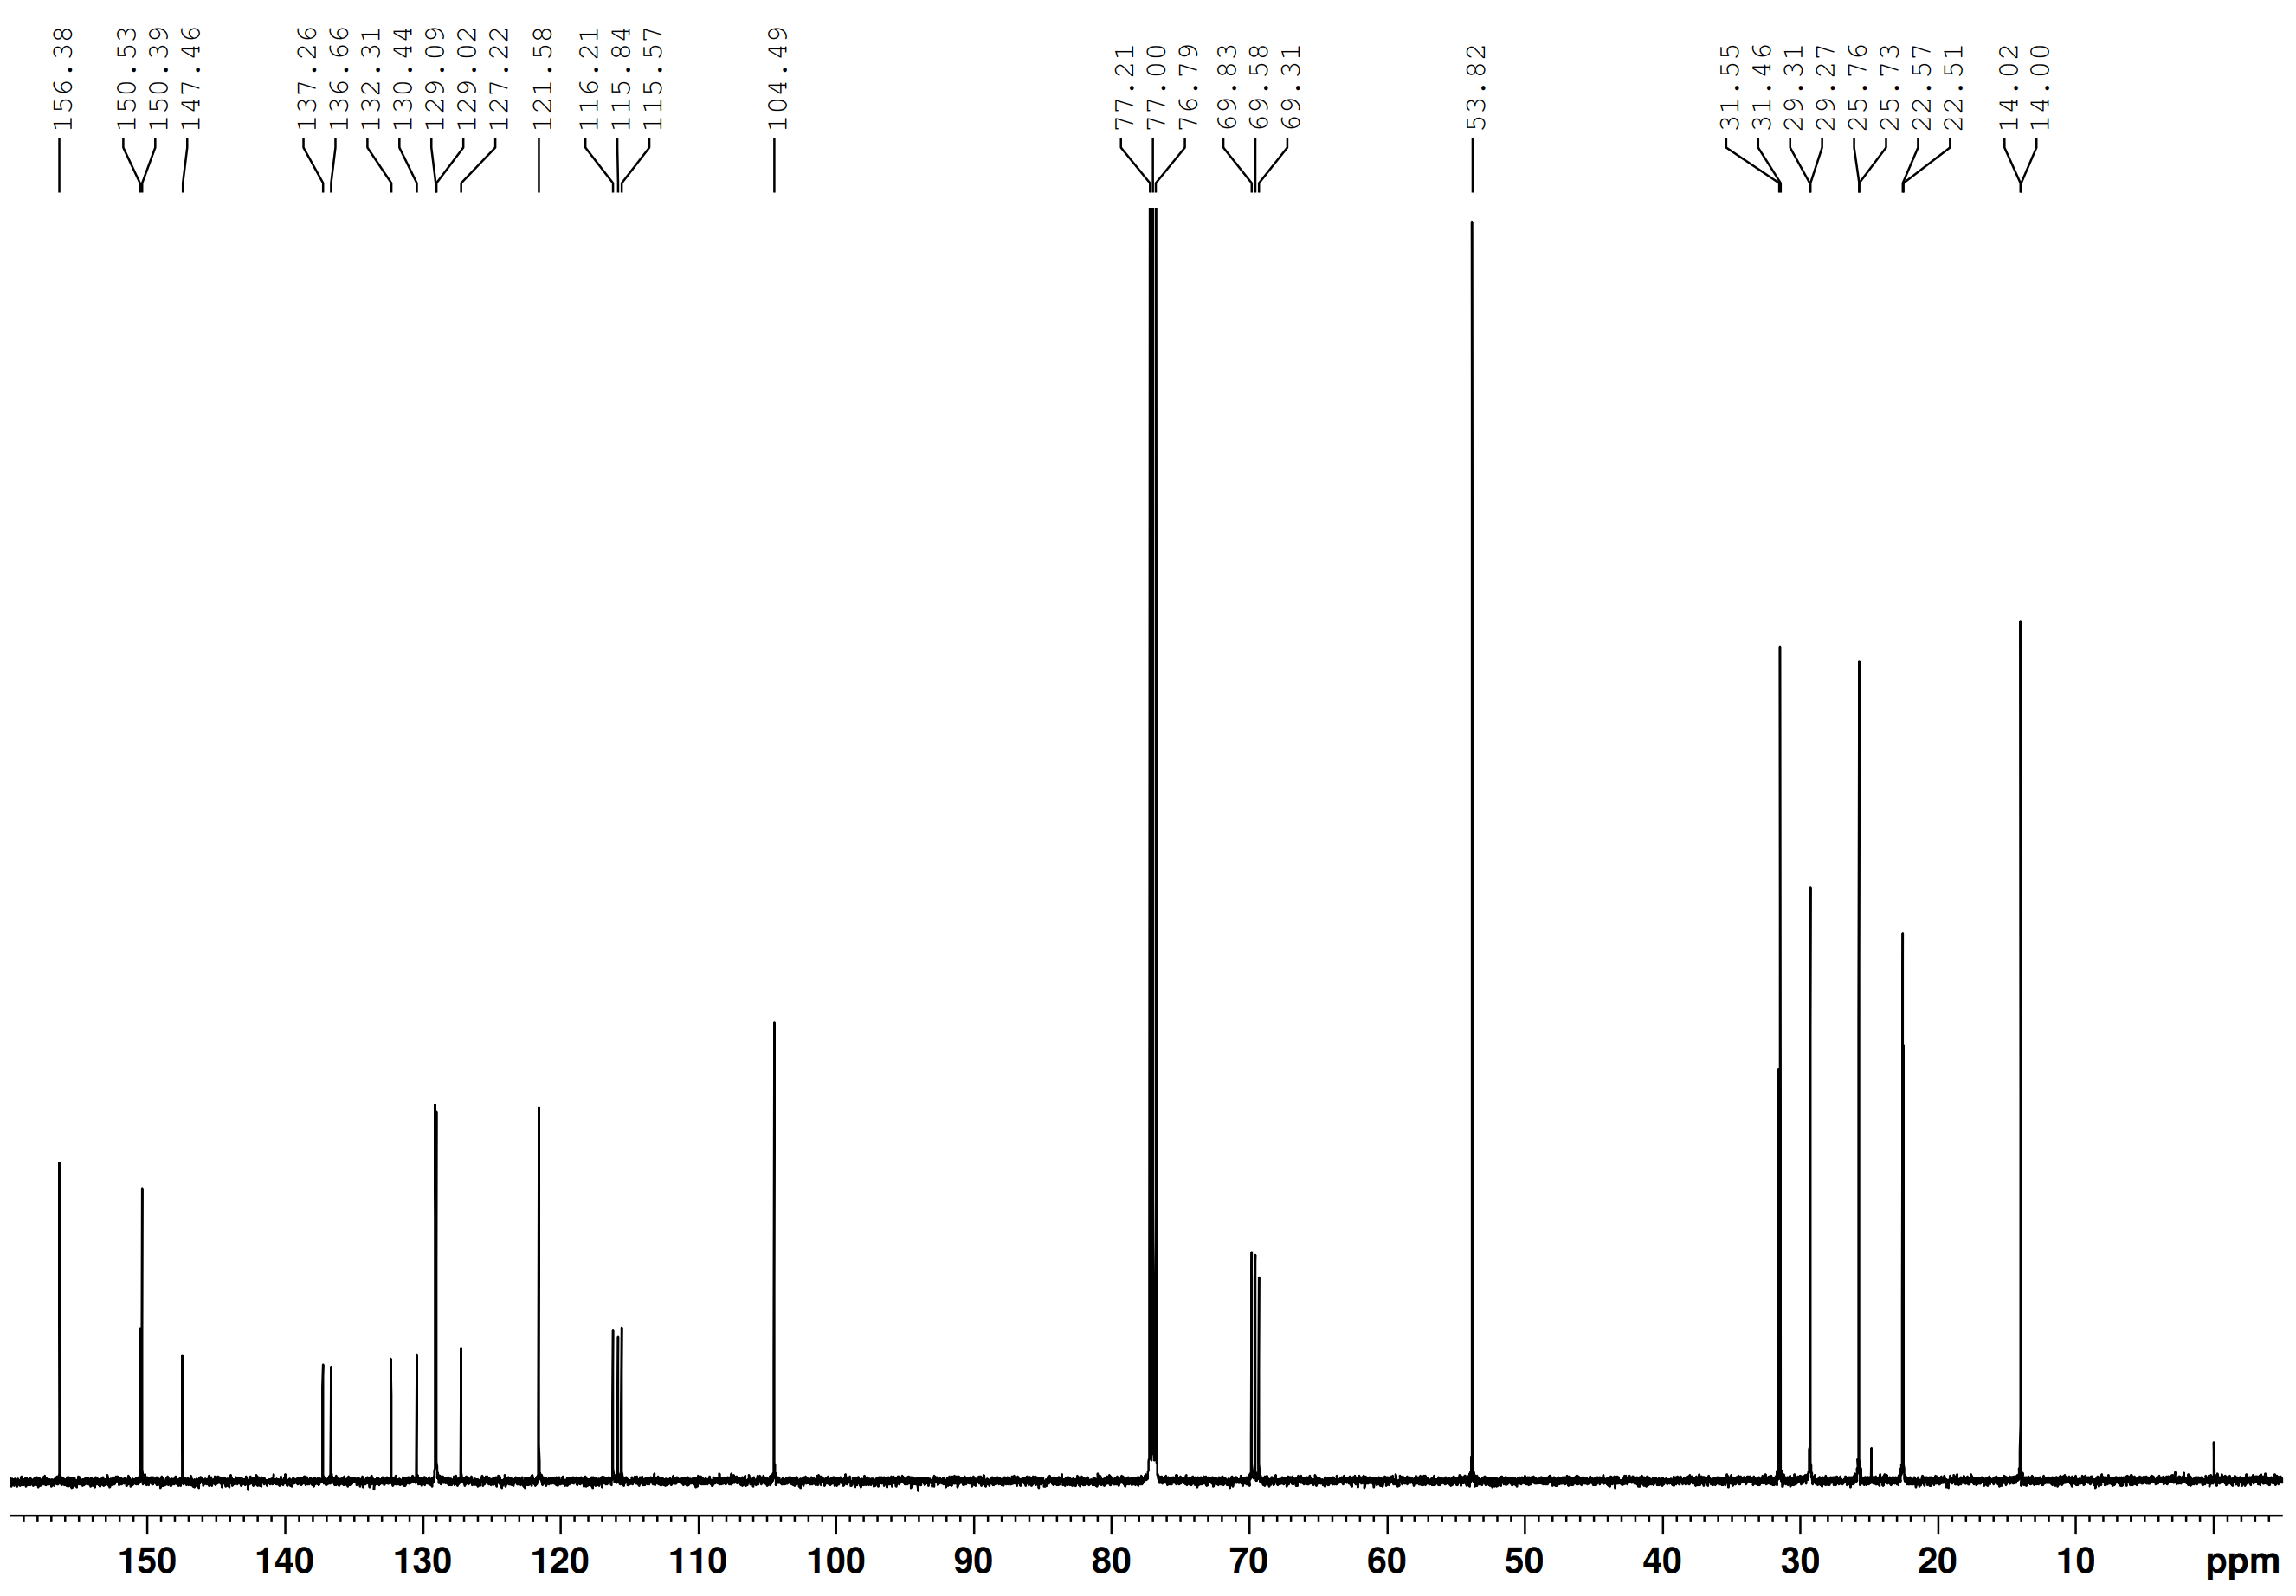


**Supplementary Figure 68 |** 13C NMR spectrum of building unit **E3** (150 MHz, CDCl3).


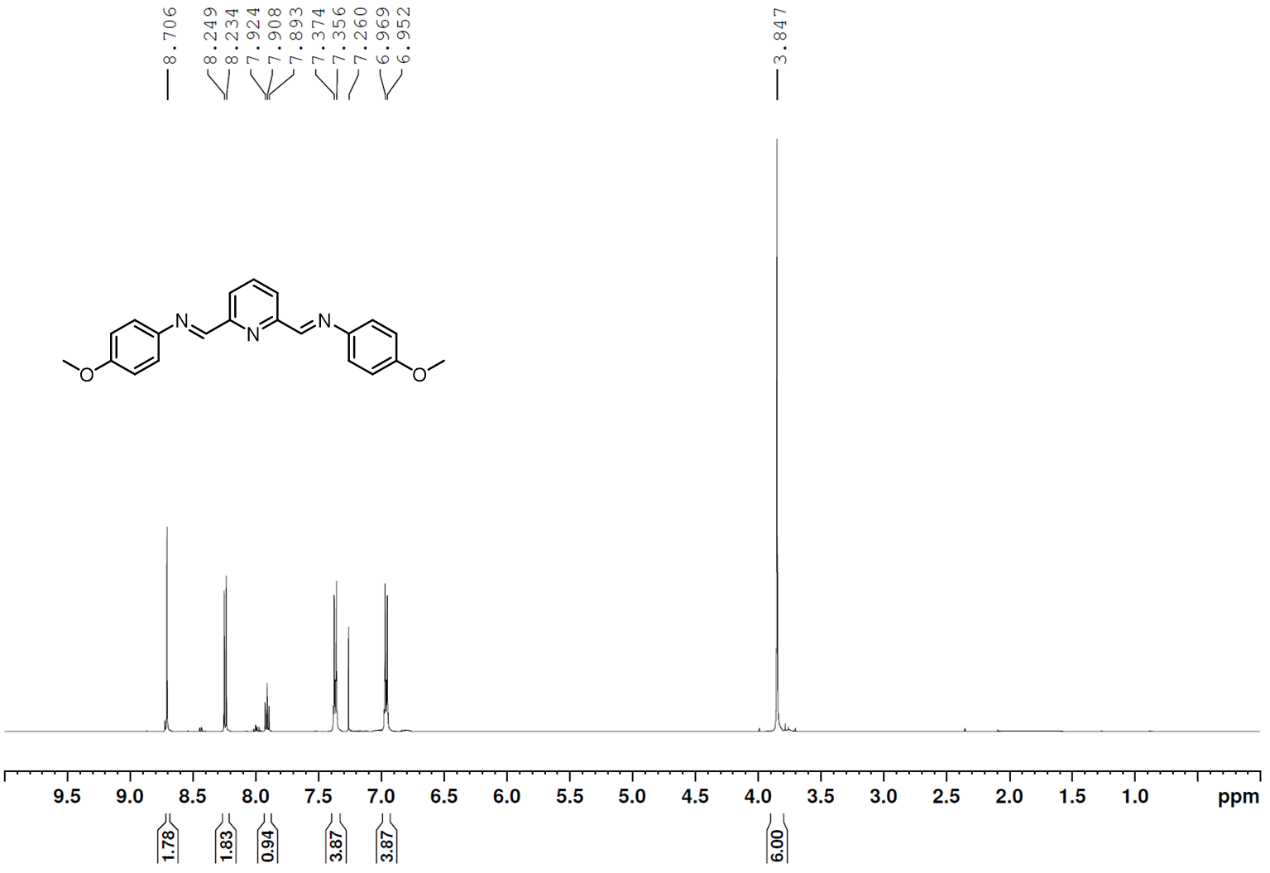


**Supplementary Figure 69 |** 1H NMR spectrum of model compound **M1** (500 MHz, CDCl3).


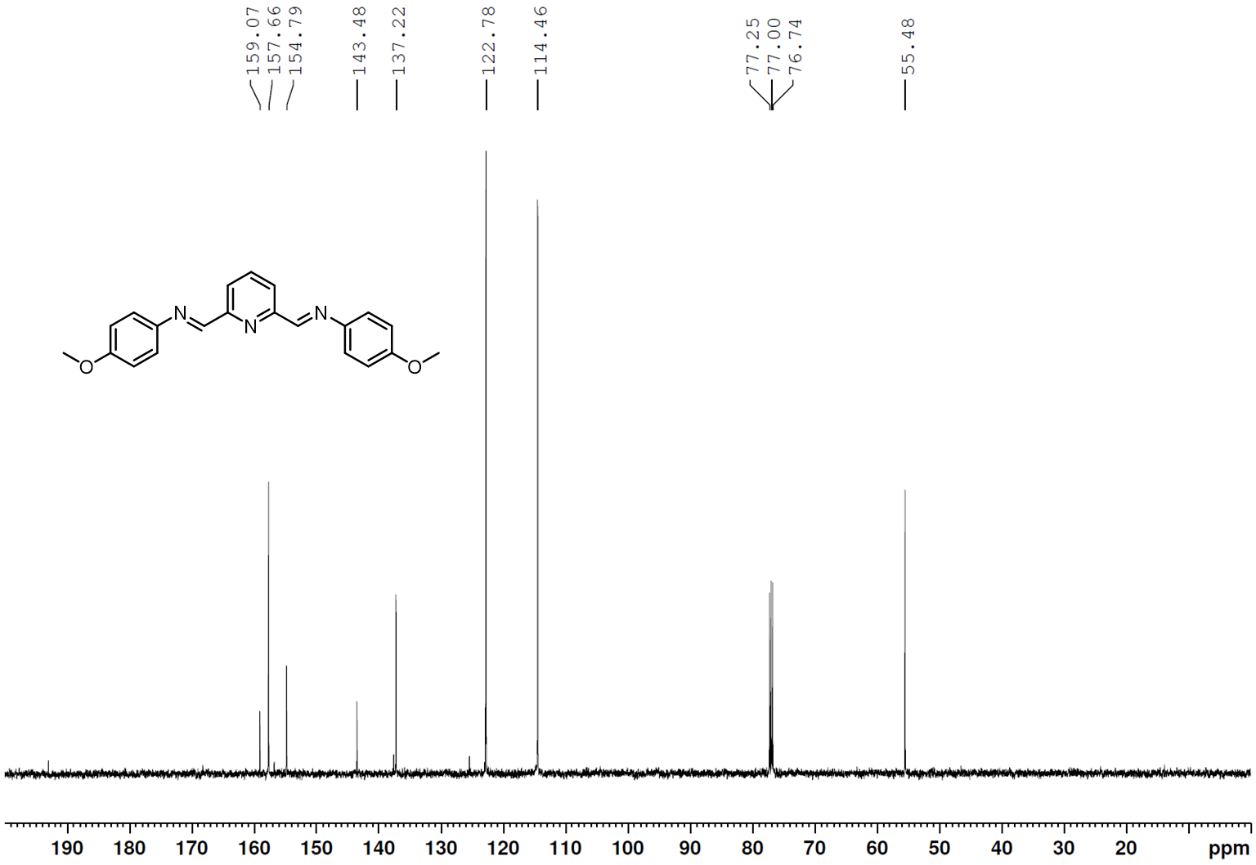


**Supplementary Figure 70 |** 13C NMR spectrum of model compound **M1** (125 MHz, CDCl3).


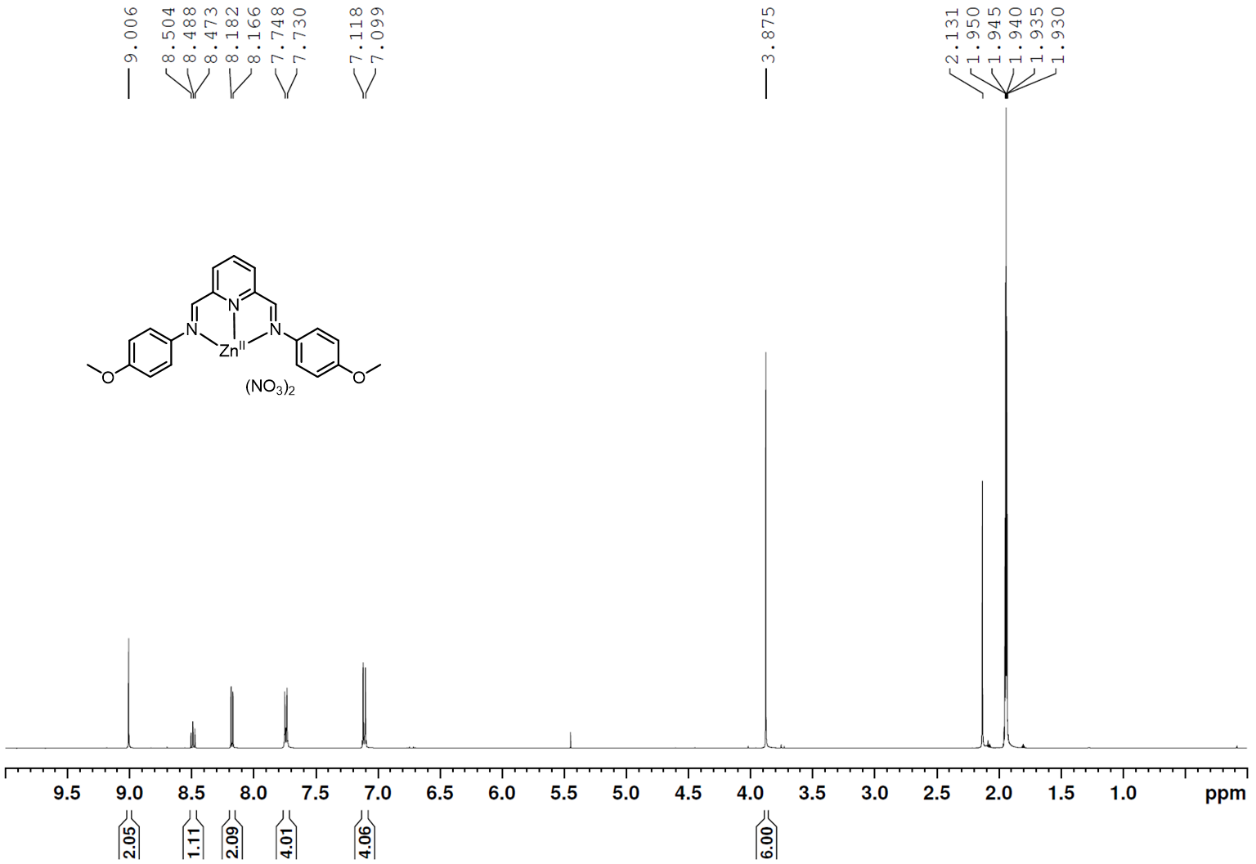


**Supplementary Figure 71 |** 1H NMR spectrum of model compound **M2** (500 MHz, CD3CN).


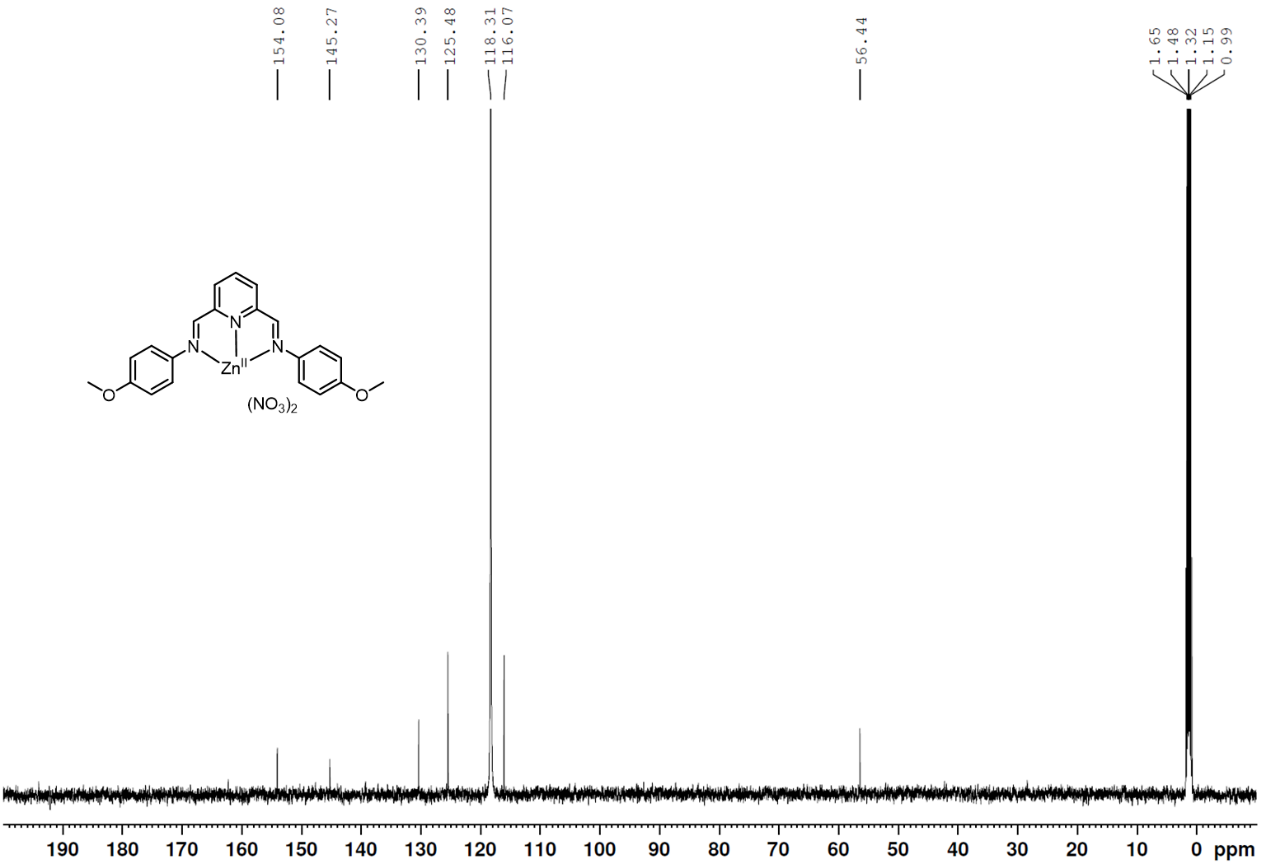


**Supplementary Figure 72 |** 13C NMR spectrum of model compound **M2** (125 MHz, CD3CN).

**Supplementary References:**

1 Wilson, E. A. *et al.* Formation of a hetero[3]rotaxane by a dynamic component-swapping strategy. *Chem. Commun.* **50**, 9665-9668 (2014).

2 Prasad, T. K. & Suh, M. P. Metal–Organic Frameworks Incorporating Various Alkoxy Pendant Groups: Hollow Tubular Morphologies, X-ray Single-Crystal Structures, and Selective Carbon Dioxide Adsorption Properties. *Chem. Asian J.* **10**, 2257-2263 (2015).

3 Hovmöller, S. CRISP: crystallographic image processing on a personal computer. *Ultramicroscopy* **41**, 121-135 (1992).

4 Cichocka, M. O., Angstrom, J., Wang, B., Zou, X. & Smeets, S. High-throughput continuous rotation electron diffraction data acquisition via software automation. *J. Appl. Crystallogr.* **51**, 1652-1661 (2018).

5 Kabsch, W. XDS. *Acta Crystallogr. Sect. D.* **66**, 125-132 (2010).

6 Wan, W., Sun, J., Su, J., Hovmoller, S. & Zou, X. Three-dimensional rotation electron diffraction: software RED for automated data collection and data processing. *J. Appl. Crystallogr.* **46**, 1863-1873 (2013).
